# Supplementary material for: Epithelial-mesenchymal transition-related genes in coronary artery disease
Source: PubMed Central journal article supplement (PMC9034345; doi:10.1515/med-2022-0476), 2022-04-22

**DAIDZEIN**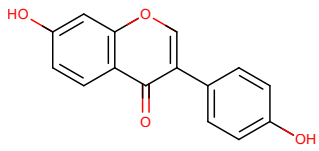**GENISTEIN**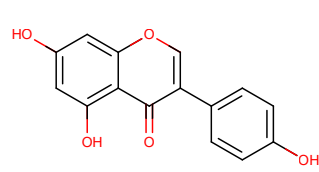**PREGNENOLONE**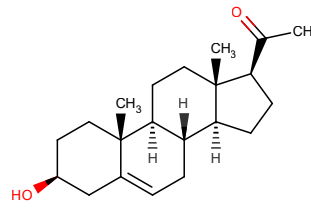**RIMEXOLONE**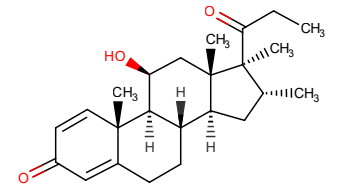**FULVESTRANT**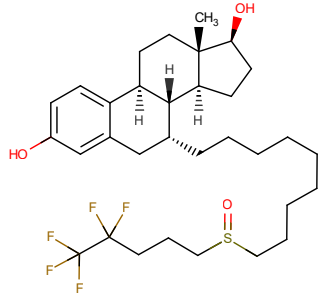**ESTRADIOL**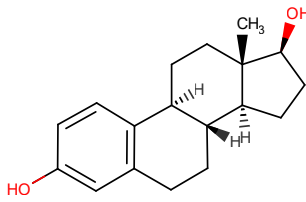**CLODRONIC ACID**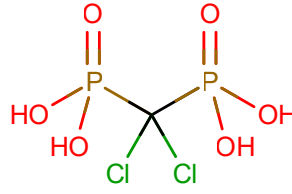**DOXORUBICIN**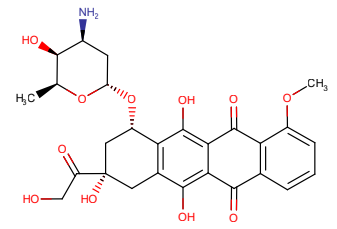**GOSERELIN**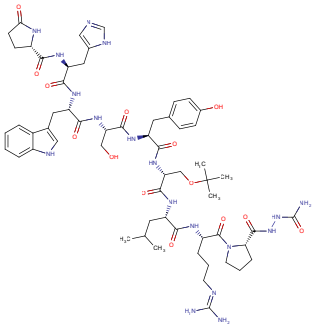**ANDROSTANOLONE**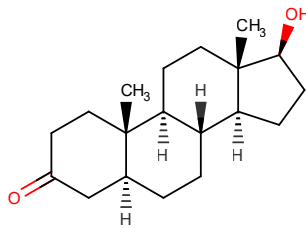**LIOTHYRONINE SODIUM**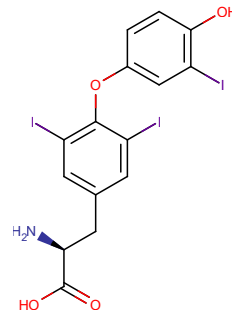**TAMOXIFEN**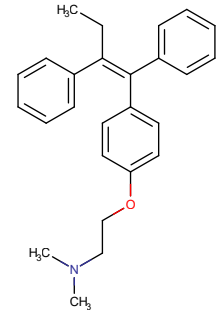**BUPIVACAINE**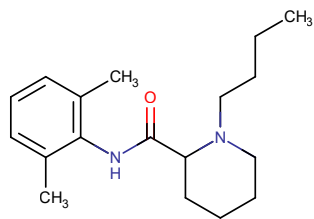**OPRELVEKIN**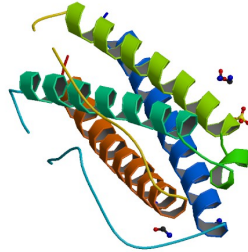**GELDANAMYCIN**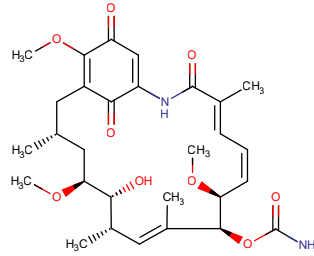**TRETINOIN**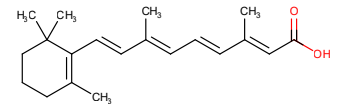**CISPLATIN**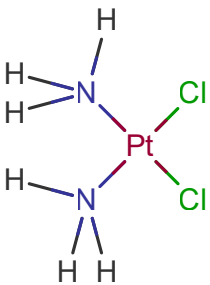**CARBOPLATIN**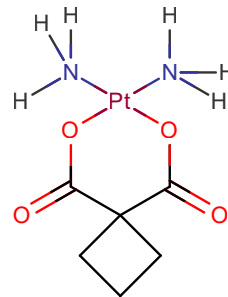**TAZAROTENE**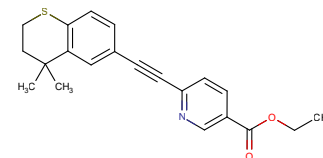**CHOLECALCIFEROL**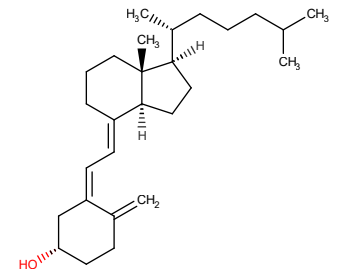**SEOCALCITOL**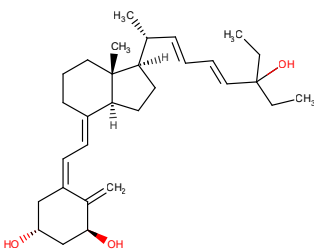**DOXERCALCIFEROL**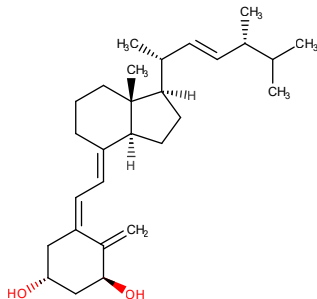**PARICALCITOL**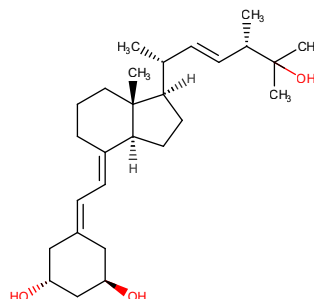**TACALCITOL**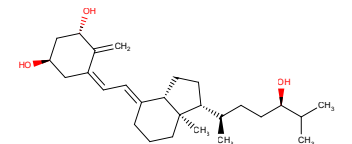

Supplement: med-2022-0476-Fig-S6B.pdf [file med-2022-0476-Fig-S6B.pdf]
