# Supplementary material for: Epithelial-mesenchymal transition-related genes in coronary artery disease
Source: PubMed Central journal article supplement (PMC9034345; doi:10.1515/med-2022-0476), 2022-04-22

DIHYDROTACHYSTEROL

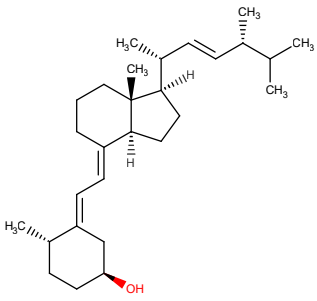

CALCIPOTRIOL

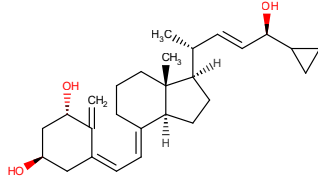

LEXACALCITOL

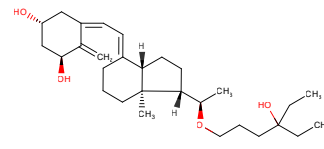

CALCIFEDIOL

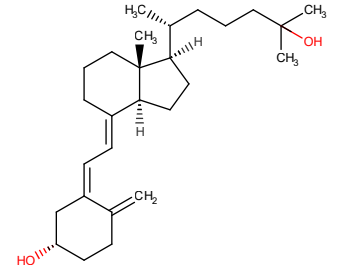

ERGOCALCIFEROL

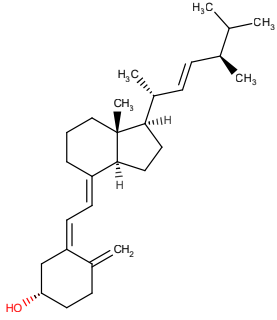

BECOCALCIDIOL

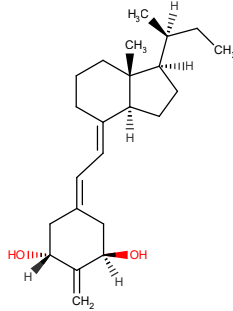

PEFCALCITOL

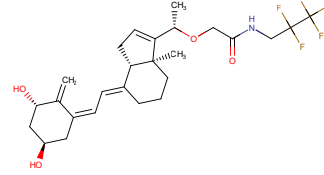

INECALCITOL

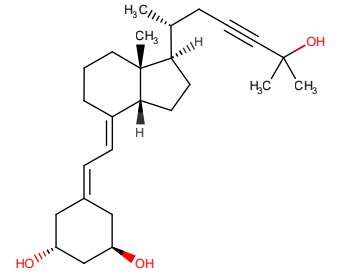

CALCITRIOL

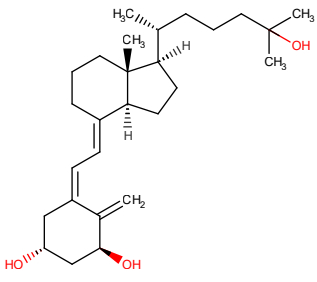

ELOCALCITOL

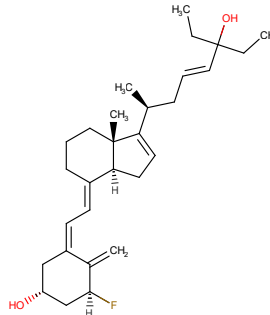

CALCIPOTRIENE

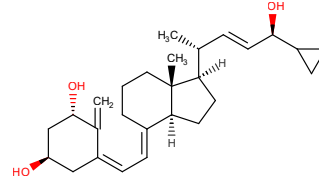

HEXACHLOROPHENE

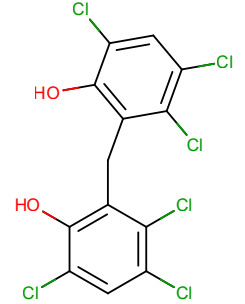

DACTINOMYCIN

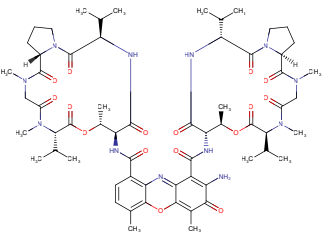

MICONAZOLE

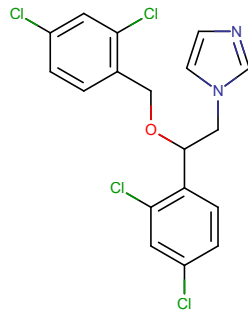

GOSSYPOL

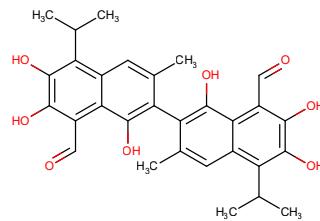

CEFOTAXIME

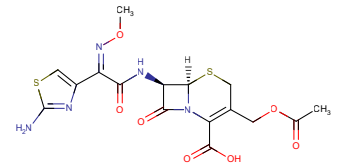

CAFFEINE

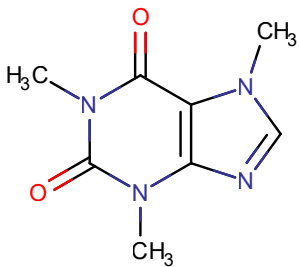

RIBAVIRIN

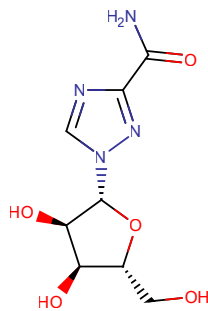

NISOLDIPINE

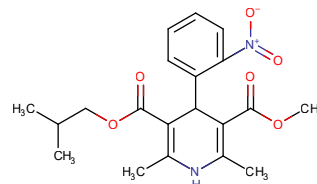

DIPHENADIONE

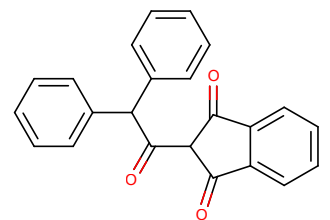

DIPYRITHIONE

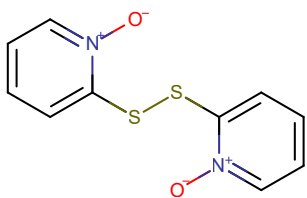

NIFEDIPINE

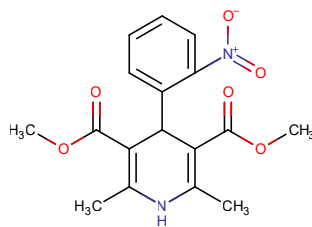

APOMORPHINE

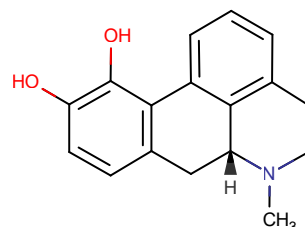

INAMRINONE

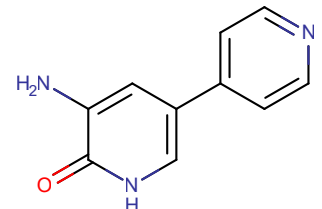

Supplement: med-2022-0476-Fig-S6C.pdf [file med-2022-0476-Fig-S6C.pdf]
