# Supplementary material for: Epithelial-mesenchymal transition-related genes in coronary artery disease
Source: PubMed Central journal article supplement (PMC9034345; doi:10.1515/med-2022-0476), 2022-04-22

ETHACRYNIC ACID

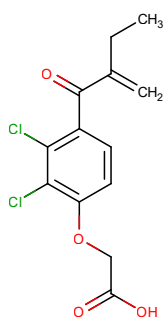

CYCLOSPORINE

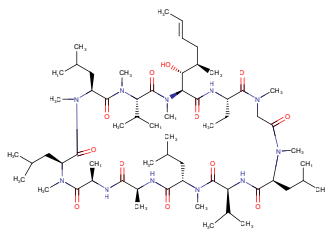

DEFERASIROX

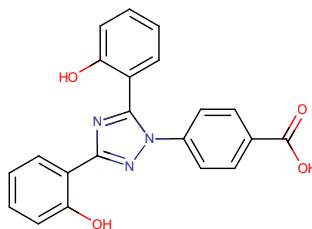

2-MERCAPTOBENZOTHAZOLE

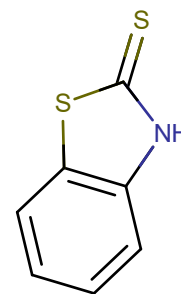CYSTEAMINE  
HYDROCHLORIDE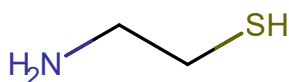

ISOLIQUIRITIGENIN

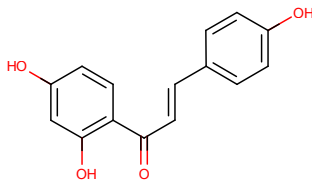

EPINEPHRINE

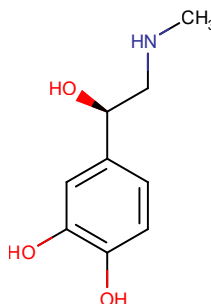

ETHACRIDINE LACTATE

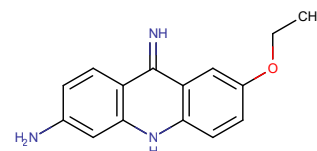

DISULFIRAM

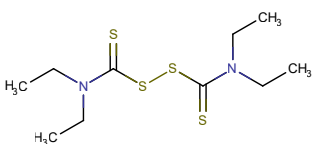

CEFACLOR

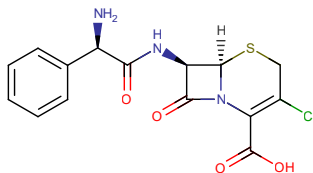

OXYPHENBUTAZONE

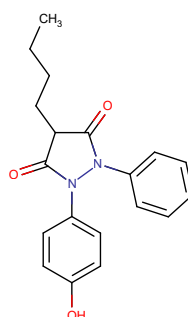

RABEPRAZOLE SODIUM

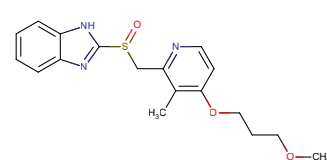

DOCONEXENT

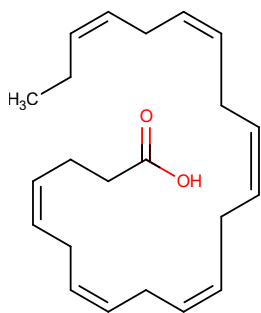

ICOSAPENT

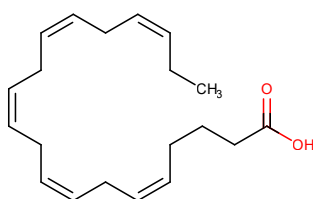

TIOXOLONE

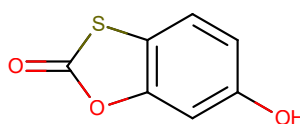

MIDAZOLAM

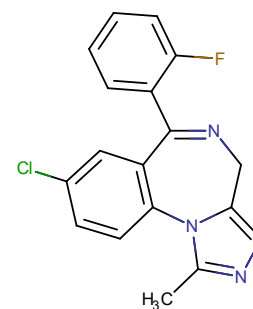

PYRITHIONE

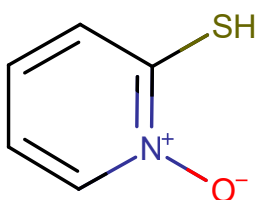

DICLAZURIL

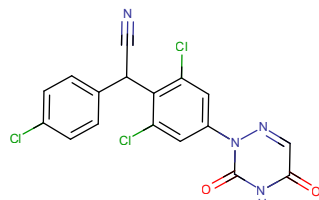

NITAZOXANIDE

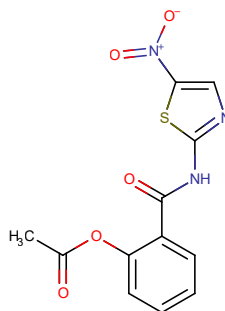

ETHACRIDINE

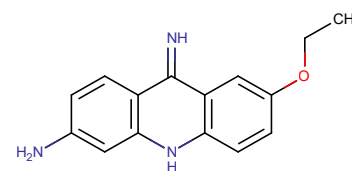

LOFEPRAMINE

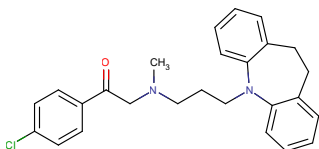

Z-PRO-PROLINAL

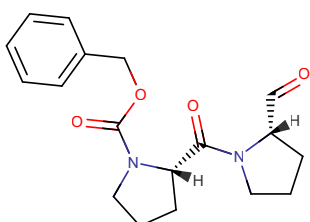

CRYPTOTANSHINONE

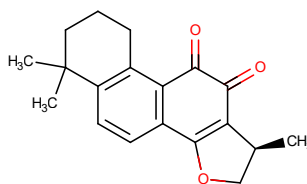

CHINIOFON

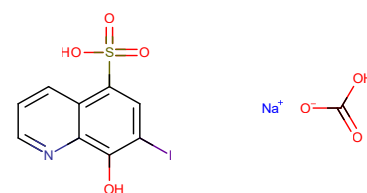

Supplement: med-2022-0476-Fig-S6D.pdf [file med-2022-0476-Fig-S6D.pdf]
