# Supplementary material for: Epithelial-mesenchymal transition-related genes in coronary artery disease
Source: PubMed Central journal article supplement (PMC9034345; doi:10.1515/med-2022-0476), 2022-04-22

**RALOXIFENE**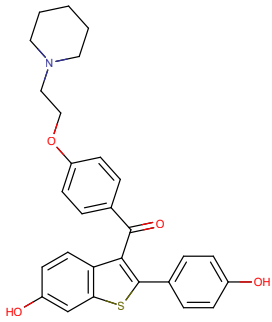**LANSOPRAZOLE**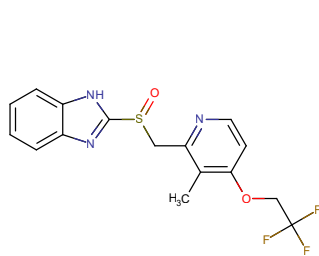**DYCLONINE**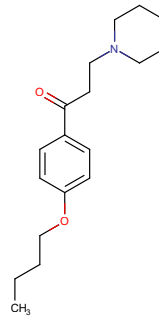**LINOLENIC ACID**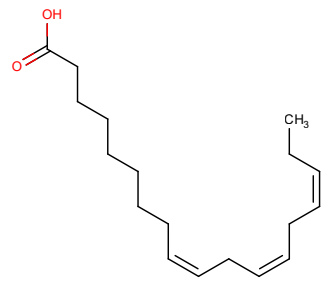**SULFOBROMOPHTHALEIN**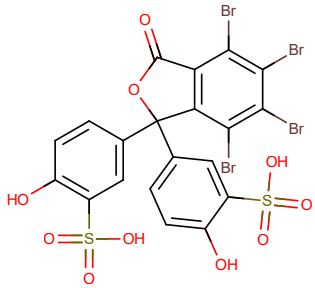**CATECHIN**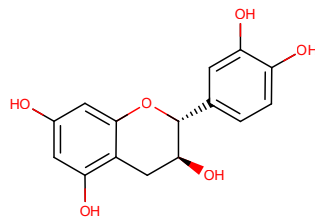**PROTOPORPHYRIN**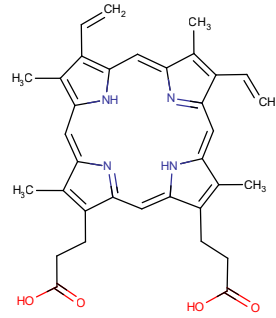**SOFALCONE**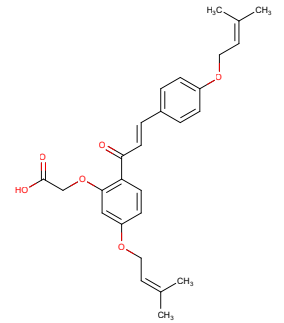**OMEPRAZOLE**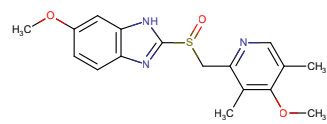**SODIUM LAURYL SULFATE**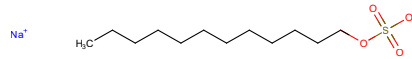**SULFINPYRAZONE**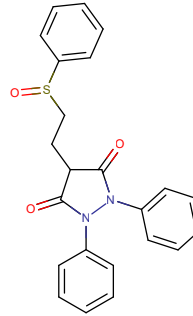**ANETHOLTRITHION**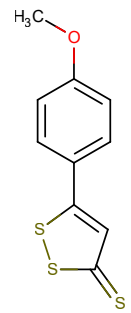**ARACHIDONIC ACID**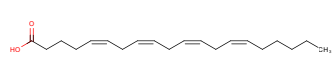**METHYSERGIDE**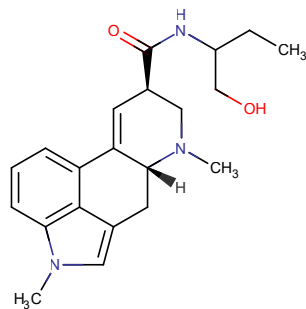**DESERPIDINE**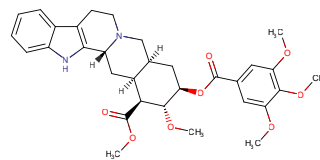**THIOTEPA**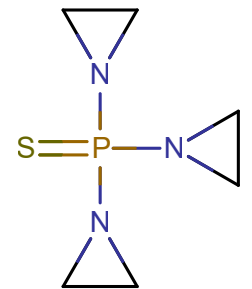**CEFPIROME**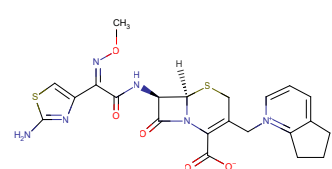**BOCEPREVIR**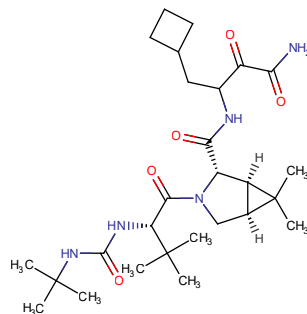**BITHIONOL**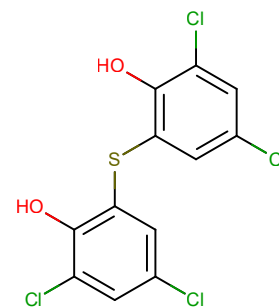**GAMOLENIC ACID**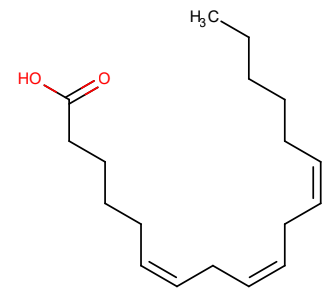**IDOQUINOL**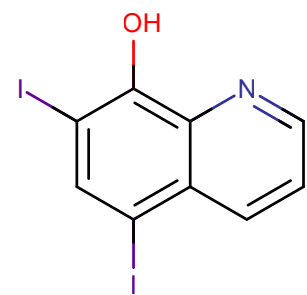**FLUPIRTINE**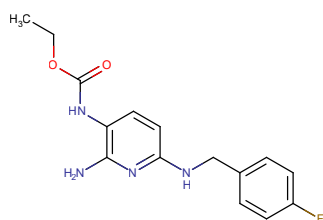**NIFEKALANT**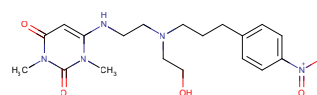**IODOFORM**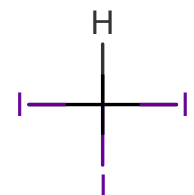

Supplement: med-2022-0476-Fig-S6F.pdf [file med-2022-0476-Fig-S6F.pdf]
