# Supplementary material for: Epithelial-mesenchymal transition-related genes in coronary artery disease
Source: PubMed Central journal article supplement (PMC9034345; doi:10.1515/med-2022-0476), 2022-04-22

**DEXAMETHASONE**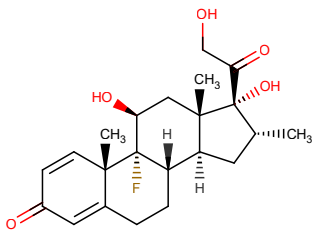**LOVASTATIN**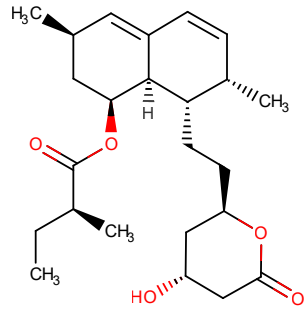**THIRAM**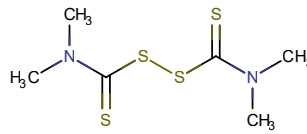**MEDROXYPROGESTERONE ACETATE**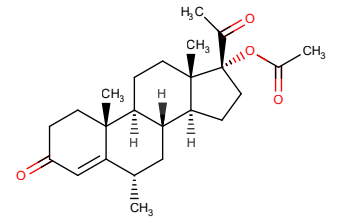**ISOETHARINE**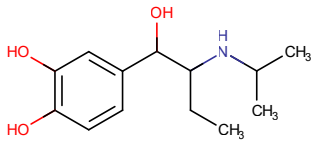**CARBARIL**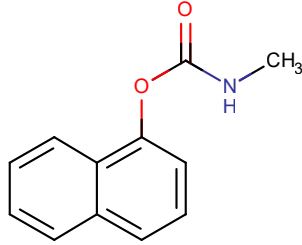**RITANSERIN**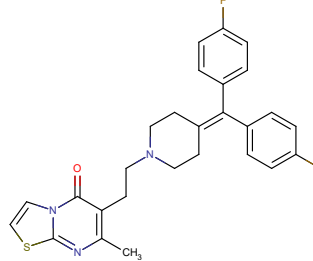**PHANQUONE**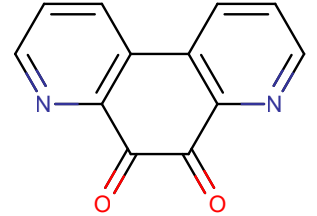**KETOCONAZOLE**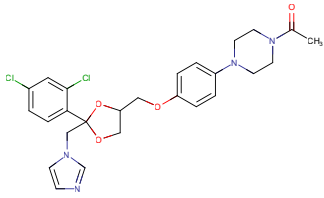**MERSALYL**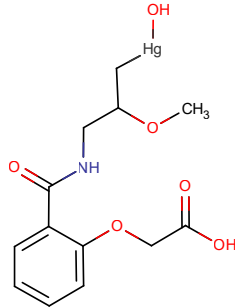**CAMPTOTHECIN**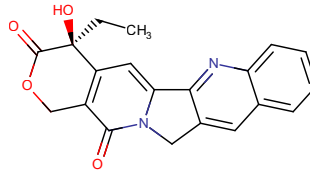**SURAMIN**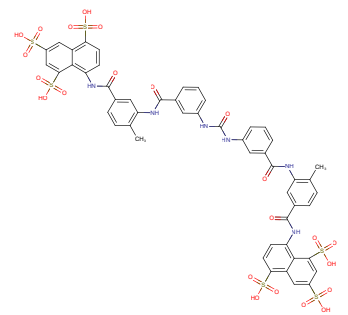**BENZBROMARONE**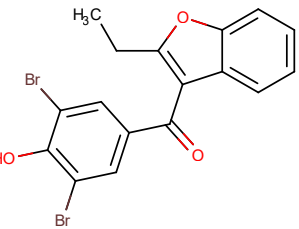**HALOPROGIN**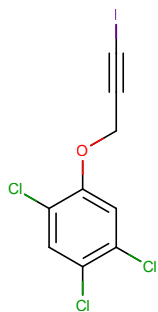**ELDECALCITOL**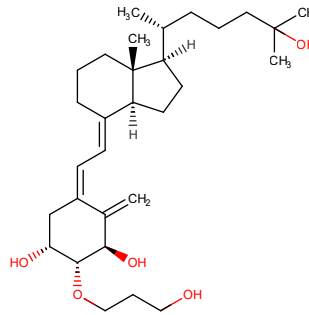**PYRITHIONE ZINC**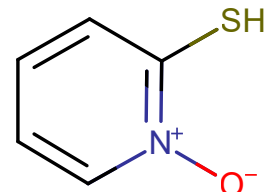**WARFARIN**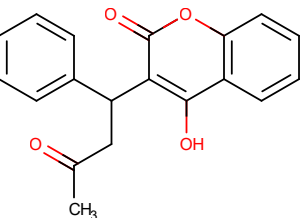**DAUNORUBICIN HYDROCHLORIDE**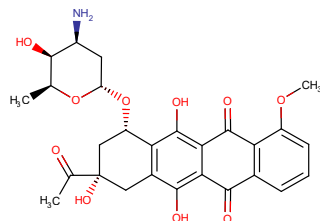**AMOXPAPINE**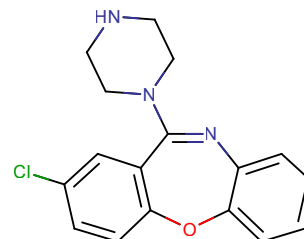**DOCUSATE**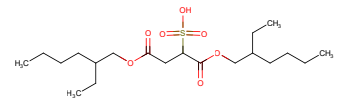**TINORIDINE**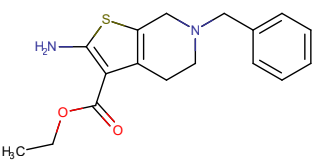**TOLFENAMIC ACID**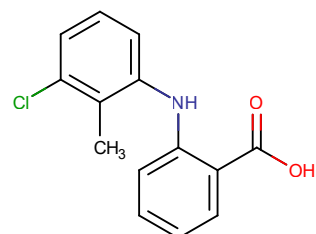**AMBAZONE**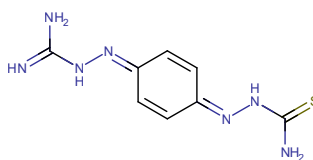**LINTITRIPT**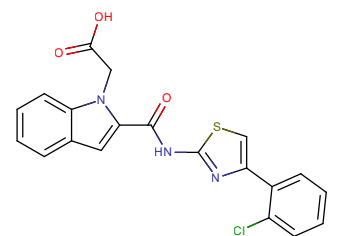

Supplement: med-2022-0476-Fig-S6G.pdf [file med-2022-0476-Fig-S6G.pdf]
