# Supplementary material for: Epithelial-mesenchymal transition-related genes in coronary artery disease
Source: PubMed Central journal article supplement (PMC9034345; doi:10.1515/med-2022-0476), 2022-04-22

**ELLAGIC ACID**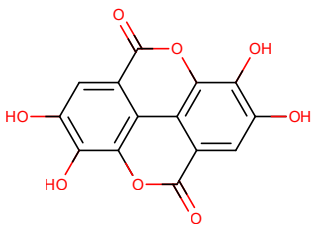**LAWSONE**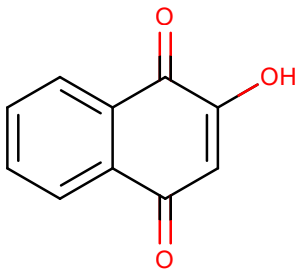**MENADIONE**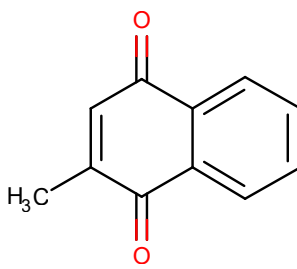**TRIMETREXATE**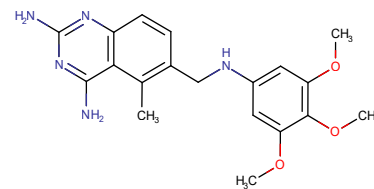**MALATHION**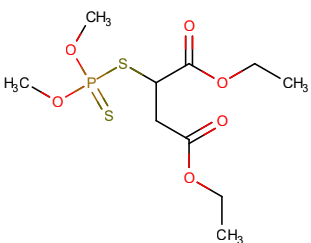**ESTROPIPATE**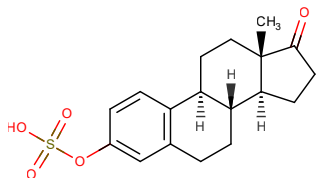**METHYLERGONOVINE**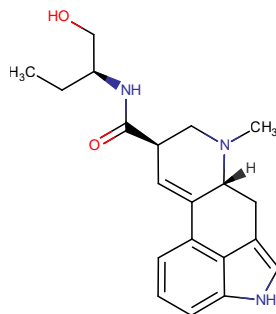**BRONOPOL**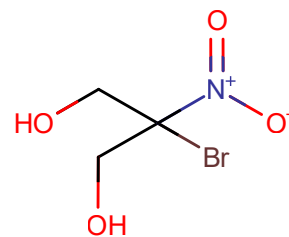**PATULIN**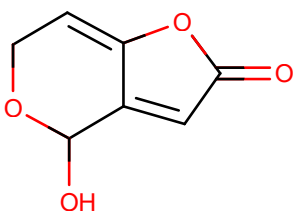**THIMEROSAL**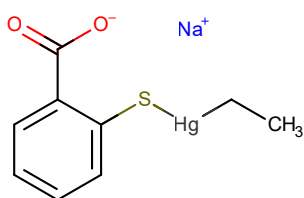**PANTOPRAZOLE**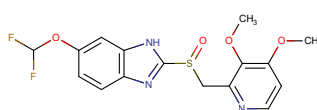**ZOMEPIRAC SODIUM**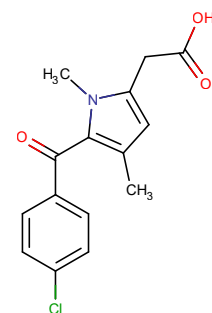**METHOTREXATE**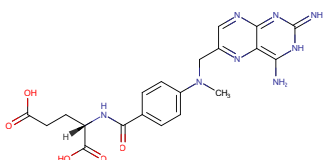**IDEBENONE**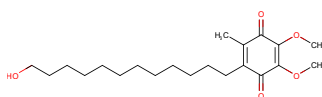**DIXANTHOGEN**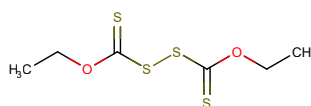**ACRIFLAVINE**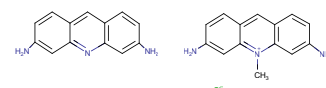**OXYTETRACYCLINE  
HYDROCHLORIDE**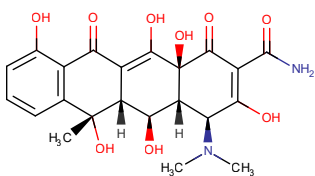**BENZIODARONE**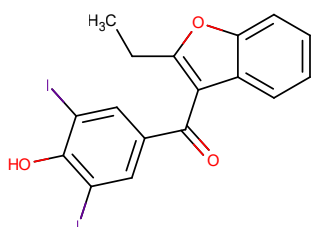**BITHIONOLATE SODIUM**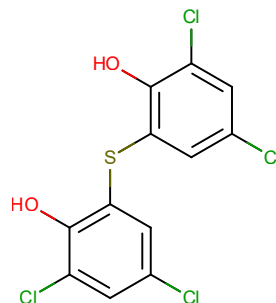**ALITRETINOIN**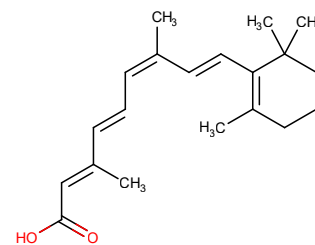**EBSELEN**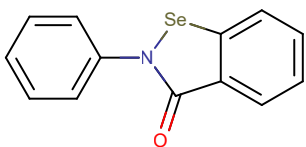**ISOPROTERENOL**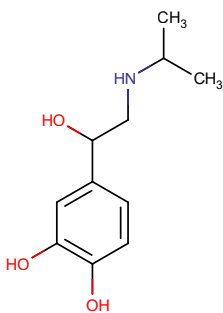**EDARAVONE**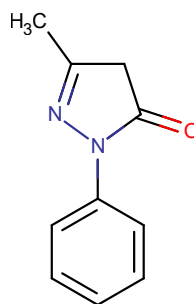**MELENGESTROL ACETATE**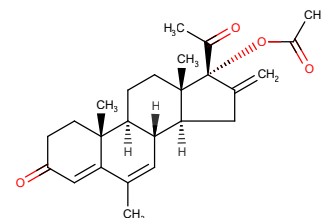

Supplement: med-2022-0476-Fig-S6H.pdf [file med-2022-0476-Fig-S6H.pdf]
