# Supplementary material for: Epithelial-mesenchymal transition-related genes in coronary artery disease
Source: PubMed Central journal article supplement (PMC9034345; doi:10.1515/med-2022-0476), 2022-04-22

BRIMONIDINE

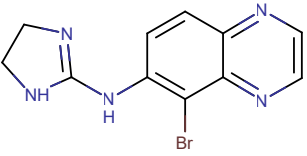

MERCURIC CHLORIDE

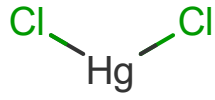

NITROXOLINE

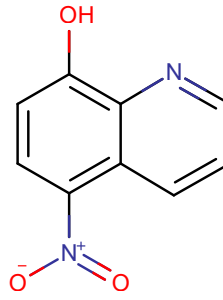

URACIL MUSTARD

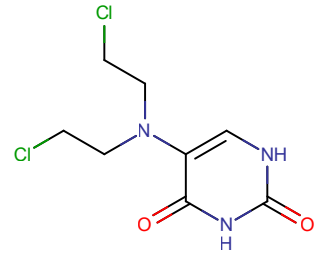

ROSE BENGAL

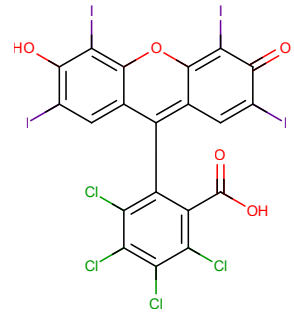

4-AMINOPHENOL

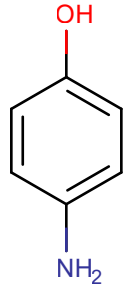

CURCUMIN

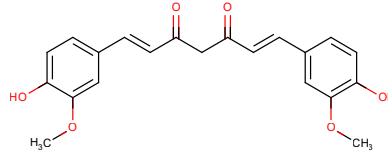

BENSERAZIDE

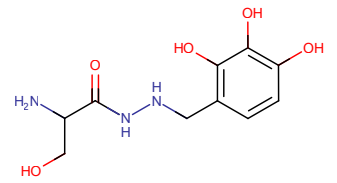

NOREPINEPHRINE

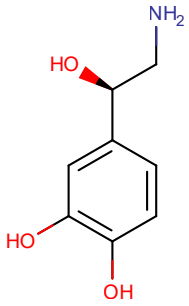

BROMOCRIPTINE

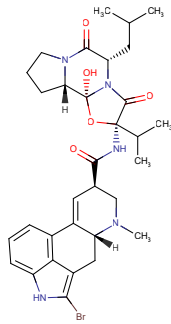

IRINOTECAN

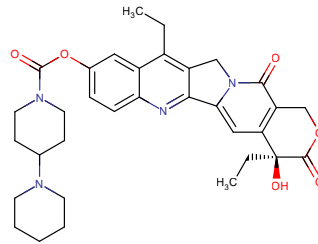

GATIFLOXACIN

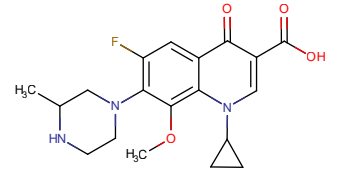

OXCARBAZEPINE

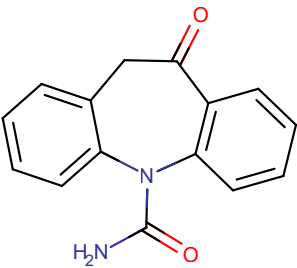

ECONAZOLE NITRATE

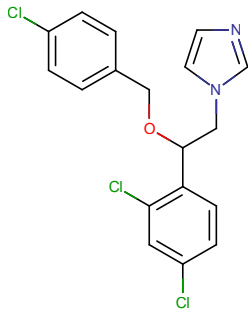

CALCIUM

Ca

NORDIHYDROGUAIARETTIC ACID

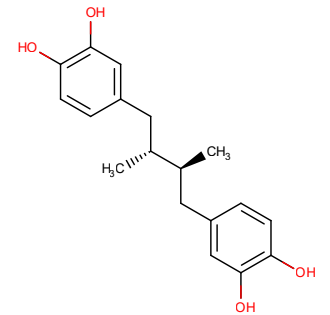

TEMEFOS

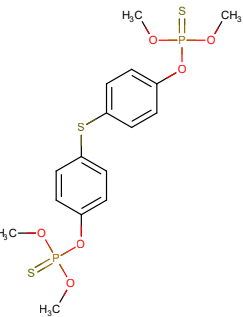

RITONAVIR

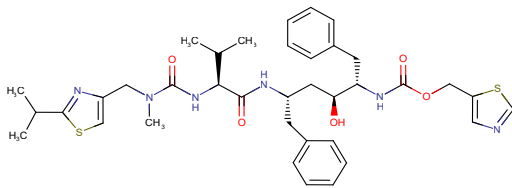

MESALAMINE

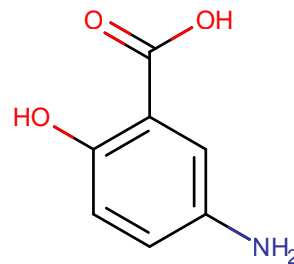

Supplement: med-2022-0476-Fig-S6I.pdf [file med-2022-0476-Fig-S6I.pdf]
