# Supplementary material for: Epithelial-mesenchymal transition-related genes in coronary artery disease
Source: PubMed Central journal article supplement (PMC9034345; doi:10.1515/med-2022-0476), 2022-04-22

**A**

CTD-2089N3.3

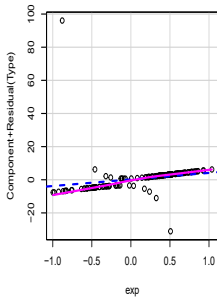

AC113167.2

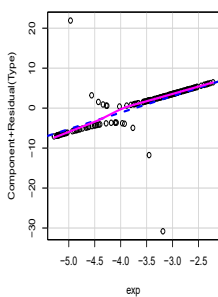

LINC02747

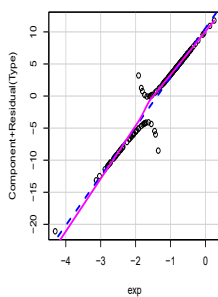

RP11-1152H15.1

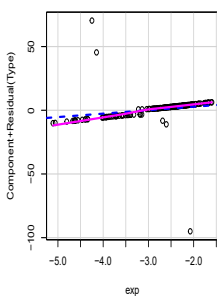

LINC02833

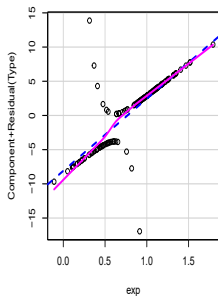

AC109460.4

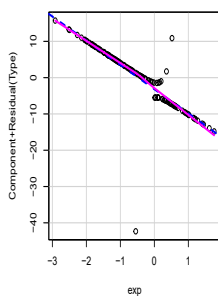

LINC01775

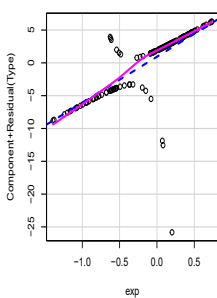

RP11-103H7.3

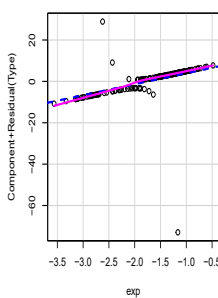**B**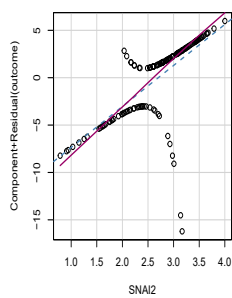

Supplement: med-2022-0476-Fig-S1.pdf [file med-2022-0476-Fig-S1.pdf]
