# Supplementary material for: Epithelial-mesenchymal transition-related genes in coronary artery disease
Source: PubMed Central journal article supplement (PMC9034345; doi:10.1515/med-2022-0476), 2022-04-22

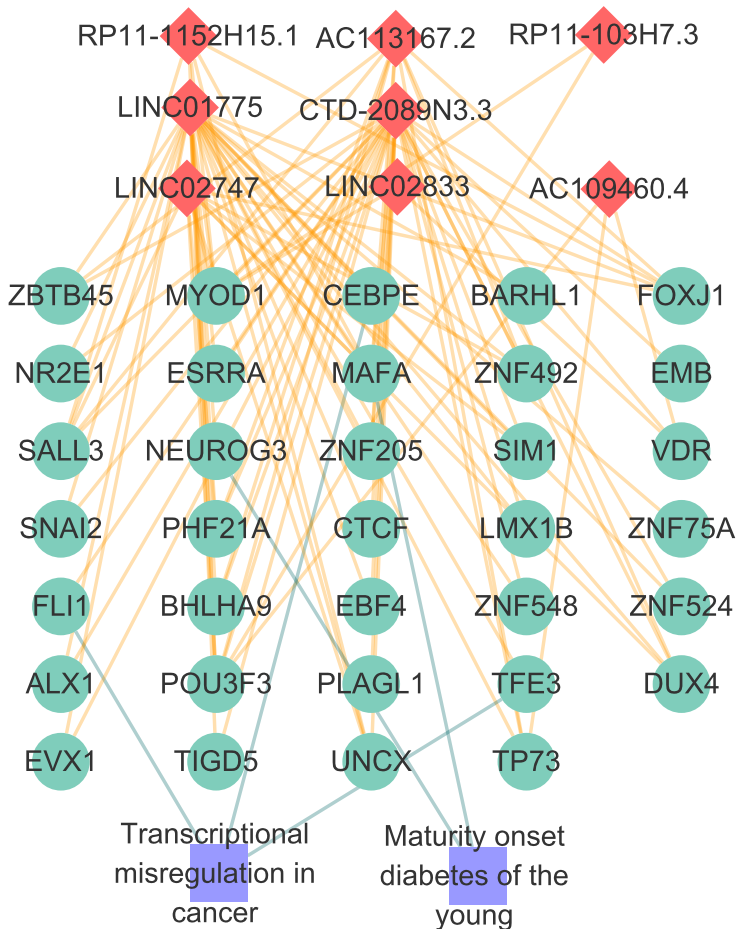

Supplement: med-2022-0476-Fig-S4B.pdf [file med-2022-0476-Fig-S4B.pdf]
