# Supplementary material for: Epithelial-mesenchymal transition-related genes in coronary artery disease
Source: Open Med (Wars). 2022 Apr 22;17(1):781–800. doi: 10.1515/med-2022-0476 (PMC9034345; doi:10.1515/med-2022-0476)
Supplement: Supplementary Table 2 [file med-2022-0476-Table-S2.xlsx]

## Sheet: Sheet1
Symbol	logFC	AveExpr	t	P.Value	adj.P.Val	B
IGSF9B	1.12185	1.55867	20.4667	2.29372e-44	4.55923e-40	90.3654
DUX4	1.24708	-0.854337	20.1788	1.03883e-43	1.03244e-39	88.874
C9orf106	1.08546	-1.12725	19.7422	1.04651e-42	6.79444e-39	86.5923
C16orf73	1.29743	-0.151592	19.692	1.3673e-42	6.79444e-39	86.3281
CLDN9	0.948001	0.406534	19.3515	8.44206e-42	3.35606e-38	84.5293
KIF17	1.83945	-1.77568	19.101	3.2523e-41	1.07743e-37	83.1962
SHANK1	1.77466	1.10824	18.9035	9.47336e-41	2.69003e-37	82.1392
POU3F3	1.14269	0.0981969	18.6487	3.78682e-40	8.76243e-37	80.7691
GCLM	1.35235	4.07003	18.629	4.2163e-40	8.76243e-37	80.6628
SHROOM4	1.21218	0.133223	18.6209	4.40833e-40	8.76243e-37	80.6188
PTGDS	1.14027	2.50519	18.5901	5.21447e-40	9.42254e-37	80.4527
NANOS2	0.851103	-1.04803	18.4788	9.5848e-40	1.51716e-36	79.8506
LOC100130745	1.16991	-1.82146	18.4725	9.92258e-40	1.51716e-36	79.8164
OPN4	1.73457	-1.39142	18.1853	4.80859e-39	6.82717e-36	78.2552
PKMYT1	1.23098	0.691376	17.9572	1.69633e-38	2.24787e-35	77.0079
HPR	0.947815	1.8239	17.7898	4.29487e-38	5.33557e-35	76.0887
LOC647070	1.26365	3.41599	17.6202	1.10461e-37	1.29155e-34	75.1538
PLEC	0.792878	0.304499	17.6047	1.20417e-37	1.32974e-34	75.0684
KLKB1	1.34083	0.415069	17.4864	2.33263e-37	2.4403e-34	74.4139
LOC100509861	1.309	-0.623254	17.3966	3.85878e-37	3.83504e-34	73.9157
C8G	0.872164	0.715755	17.1364	1.66615e-36	1.57706e-33	72.4675
HBM	1.23468	0.798664	17.0454	2.7844e-36	2.5157e-33	71.9591
XLOC_001485	1.54931	-2.42483	17.0371	2.91752e-36	2.52137e-33	71.9129
OR10AD1	1.18279	0.16522	17.0186	3.2387e-36	2.68232e-33	71.8095
DEFB1	1.15659	0.814	16.9346	5.20832e-36	4.14103e-33	71.339
BIRC7	1.86314	-2.51115	16.9186	5.70271e-36	4.35972e-33	71.2492
PPP1R3F	1.16513	0.293785	16.8927	6.60245e-36	4.86062e-33	71.1042
ADM	1.17593	2.63579	16.8173	1.0125e-35	7.18765e-33	70.6808
OR4C3	1.61715	-0.743589	16.7465	1.51327e-35	1.03722e-32	70.2828
DCUN1D1	1.1019	0.371066	16.6111	3.27039e-35	2.10449e-32	69.5196
LOC390660	0.763134	-0.122242	16.6104	3.28214e-35	2.10449e-32	69.516
GNAL	1.08743	0.448836	16.6037	3.41039e-35	2.11839e-32	69.4781
MUC3A	1.38041	-1.77807	16.5719	4.0873e-35	2.46192e-32	69.2988
PHF21A	1.23229	3.2636	16.5378	4.96605e-35	2.90324e-32	69.1059
SALL3	1.08679	2.65319	16.5291	5.21733e-35	2.96262e-32	69.057
PRLH	1.02828	0.633285	16.5233	5.39362e-35	2.96262e-32	69.0241
LOC100129406	0.903463	0.659424	16.5194	5.51477e-35	2.96262e-32	69.0021
GPR32	1.13208	-0.192143	16.4843	6.74059e-35	3.52586e-32	68.8033
ADAMTSL1	0.869373	-2.52065	16.3924	1.13945e-34	5.80742e-32	68.2833
SEMA3B	1.09167	2.3884	16.3489	1.46128e-34	7.26144e-32	68.0368
HSD3B1	1.19163	-1.34173	16.3026	1.90502e-34	9.23563e-32	67.7742
KIRREL	1.09603	-0.364508	16.2732	2.25583e-34	1.0676e-31	67.6067
XLOC_004815	1.03973	0.166952	16.2688	2.31228e-34	1.06887e-31	67.5822
LOC100287558	0.917907	-0.845684	16.2238	2.99378e-34	1.32771e-31	67.3264
LYNX1	1.0202	-1.09079	16.2231	3.00582e-34	1.32771e-31	67.3224
SLC22A31	1.14105	1.46268	16.2	3.43217e-34	1.48307e-31	67.191
GNG2	-0.960352	2.25257	-16.1918	3.59808e-34	1.52168e-31	67.1442
XLOC_001392	1.48908	-1.38942	16.1859	3.72221e-34	1.54138e-31	67.1106
TRPM5	1.71095	-2.2255	16.1576	4.37796e-34	1.77593e-31	66.9499
CDRT15L2	1.42031	-0.896516	16.1187	5.47593e-34	2.1769e-31	66.7282
KCNK9	1.13305	-1.91948	16.0677	7.34365e-34	2.86215e-31	66.4374
BHLHA9	0.849983	-0.467966	16.0235	9.46877e-34	3.61944e-31	66.1856
MYBPC3	1.03181	-1.81707	16.016	9.8863e-34	3.70773e-31	66.1429
IL17REL	1.4232	-0.191549	16.0071	1.04082e-33	3.83117e-31	66.0919
GPR150	0.931888	2.92187	15.9877	1.16399e-33	4.20666e-31	65.9811
KBTBD13	0.824708	0.136361	15.9532	1.42e-33	5.04022e-31	65.7841
C1orf70	0.72024	1.61382	15.9109	1.81304e-33	6.26931e-31	65.542
NUPR1	1.68447	-2.86458	15.9093	1.82935e-33	6.26931e-31	65.5332
IL17RC	1.04458	0.366229	15.8731	2.25458e-33	7.59563e-31	65.3261
LINC00302	1.16584	1.32738	15.8671	2.33478e-33	7.73475e-31	65.2914
HDAC10	0.865768	-0.0284324	15.8516	2.55374e-33	8.32144e-31	65.2026
CLDN2	0.881772	-1.22843	15.8348	2.81381e-33	9.02098e-31	65.1065
MAFA	0.783392	2.75118	15.8156	3.14294e-33	9.77975e-31	64.9969
XLOC_008094	0.876225	0.709784	15.8153	3.14889e-33	9.77975e-31	64.995
CNTN4	1.02445	-0.852638	15.7677	4.14795e-33	1.26844e-30	64.722
LOC100129115	1.02226	1.05866	15.7234	5.35982e-33	1.6142e-30	64.468
DRD3	1.01316	0.667867	15.7196	5.4793e-33	1.62555e-30	64.4462
GOLGA2	0.84433	1.30492	15.715	5.62766e-33	1.64492e-30	64.4197
SLC4A11	1.01337	-1.12119	15.7125	5.71008e-33	1.64492e-30	64.4053
SHROOM1	0.803756	2.98102	15.6953	6.30829e-33	1.77253e-30	64.3066
NRIP2	0.852576	0.789734	15.6946	6.33142e-33	1.77253e-30	64.3029
XLOC_002622	0.810591	-0.44314	15.6711	7.25785e-33	2.00367e-30	64.1676
UNCX	0.809694	3.84588	15.6669	7.43528e-33	2.02453e-30	64.1437
CHMP6	0.924026	1.8701	15.6481	8.28987e-33	2.22673e-30	64.0359
XLOC_000348	0.985205	1.52049	15.5666	1.33011e-32	3.52516e-30	63.5674
XLOC_007377	1.00075	0.60094	15.5314	1.63236e-32	4.26926e-30	63.3644
COL4A2	0.91517	-1.19225	15.5267	1.67691e-32	4.32883e-30	63.3378
KRT32	1.45349	-0.537224	15.523	1.71411e-32	4.36813e-30	63.316
LOC100130433	0.923352	1.37426	15.489	2.08775e-32	5.19426e-30	63.1206
HDAC11	0.668268	-1.19365	15.487	2.11265e-32	5.19426e-30	63.1089
FAIM2	1.38964	-0.770406	15.4867	2.11669e-32	5.19426e-30	63.107
ZNF492	1.34405	-1.74042	15.4533	2.57027e-32	6.2304e-30	62.9145
KANK3	0.755541	3.1566	15.4479	2.65181e-32	6.3506e-30	62.8836
PRAMEF12	1.15053	-1.24458	15.4436	2.72005e-32	6.43647e-30	62.8584
CIB3	0.876767	0.612705	15.4041	3.42248e-32	8.00338e-30	62.6308
SLC9A3R2	0.935582	1.3785	15.3972	3.56204e-32	8.23288e-30	62.5912
MYO1C	0.747805	6.74544	15.3935	3.63931e-32	8.31477e-30	62.5699
SLC5A11	1.02105	-0.852425	15.3795	3.9503e-32	8.92275e-30	62.4886
CORT	1.03123	-1.37334	15.3699	4.17733e-32	9.32952e-30	62.4332
XLOC_011950	1.24305	-1.32155	15.3627	4.35658e-32	9.62174e-30	62.3916
CLDN5	0.882438	-0.838773	15.3593	4.44344e-32	9.70575e-30	62.372
FTMT	1.7676	-0.902428	15.3406	4.95327e-32	1.06834e-29	62.2644
NEURL1B	1.08283	-3.4975	15.3391	4.9985e-32	1.06834e-29	62.2554
TM4SF5	1.51725	-2.16405	15.3232	5.48156e-32	1.15912e-29	62.164
GPR124	0.99058	-1.49059	15.3136	5.79936e-32	1.21341e-29	62.1081
GPR25	0.871046	1.31046	15.3107	5.8993e-32	1.22146e-29	62.0912
IGFALS	1.02422	-1.76126	15.2993	6.30385e-32	1.28765e-29	62.0254
ADRA2A	1.05232	1.86585	15.2981	6.34852e-32	1.28765e-29	62.0184
PRR15	0.787164	3.42495	15.2833	6.91958e-32	1.3893e-29	61.9331
LOC646014	0.969819	2.10085	15.2751	7.26031e-32	1.44313e-29	61.8854
XLOC_014119	0.996049	-0.849488	15.2613	7.86826e-32	1.54849e-29	61.8057
MYH14	0.870805	0.493257	15.206	1.08641e-31	2.11712e-29	61.486
C7orf51	1.0672	0.350035	15.188	1.20734e-31	2.31172e-29	61.3814
XLOC_013950	1.0526	-0.254515	15.1876	1.20953e-31	2.31172e-29	61.3796
TP73	0.878479	-0.0786431	15.1851	1.22735e-31	2.32342e-29	61.3651
RUSC1	0.682218	0.0359051	15.1602	1.41964e-31	2.66209e-29	61.2208
ASRGL1	1.00713	0.403317	15.1517	1.49248e-31	2.77253e-29	61.1712
PAX8	1.34945	-2.73567	15.1316	1.67803e-31	3.08835e-29	61.0551
LOC100130857	1.10326	1.92602	15.1031	1.98251e-31	3.61526e-29	60.8898
FAM179A	0.88311	-1.66024	15.0989	2.03226e-31	3.64957e-29	60.8653
KITLG	1.38306	-1.87305	15.0984	2.03805e-31	3.64957e-29	60.8624
LCE1A	1.1625	0.282715	15.0945	2.08547e-31	3.70116e-29	60.8396
XLOC_004697	1.25447	-2.00202	15.085	2.2047e-31	3.87812e-29	60.7845
LOC652586	1.08896	1.43641	15.0805	2.26335e-31	3.94637e-29	60.7585
GDF7	0.833017	0.121234	15.0772	2.30762e-31	3.98857e-29	60.7393
BCAM	1.05106	-0.551304	15.034	2.97146e-31	5.0917e-29	60.4887
XLOC_011718	1.03776	-0.818431	15.0003	3.6209e-31	6.15151e-29	60.2928
OVOS2	1.00333	2.20565	14.9958	3.71578e-31	6.25919e-29	60.2671
KCNH3	0.809641	1.48277	14.9911	3.82141e-31	6.38304e-29	60.2394
AQP8	0.985021	-2.22448	14.988	3.89028e-31	6.44392e-29	60.2217
PRAMEF7	0.879032	-1.62508	14.9584	4.62901e-31	7.6042e-29	60.0493
PPIAL4G	1.38316	3.8214	14.937	5.24547e-31	8.54625e-29	59.9254
PLEKHN1	1.13458	1.4092	14.9265	5.58123e-31	9.01936e-29	59.8639
XLOC_l2_013427	2.05112	-2.68267	14.9164	5.92128e-31	9.49171e-29	59.8053
COL23A1	0.965848	2.60719	14.9081	6.21805e-31	9.88665e-29	59.7568
XLOC_001919	1.32266	-1.45249	14.9064	6.27688e-31	9.88665e-29	59.7475
TRAIP	0.876568	-0.00866698	14.9054	6.31687e-31	9.88665e-29	59.7412
LOC100130657	0.955263	1.99433	14.9031	6.40239e-31	9.94222e-29	59.7278
KRTAP10-12	0.875925	0.710771	14.8885	6.9754e-31	1.07481e-28	59.6429
CPEB1	1.51775	-3.27207	14.8807	7.29924e-31	1.11605e-28	59.5979
CFC1	1.03649	-0.659546	14.8768	7.47197e-31	1.13374e-28	59.5747
CCR6	0.972465	0.481715	14.8738	7.60293e-31	1.14487e-28	59.5575
TTC21A	0.955706	0.35344	14.85	8.74479e-31	1.30692e-28	59.4188
TMEM174	1.00675	1.70821	14.8234	1.02209e-30	1.51613e-28	59.2642
LMAN1L	1.02291	-2.10171	14.8138	1.08182e-30	1.58747e-28	59.2079
TBC1D26	1.11005	-1.05728	14.8131	1.08616e-30	1.58747e-28	59.2039
XLOC_l2_003593	1.04759	0.361661	14.7979	1.18742e-30	1.72279e-28	59.1156
INHBA	0.891674	-0.243526	14.7856	1.27674e-30	1.83028e-28	59.0437
XLOC_004679	1.11851	0.010574	14.7851	1.27991e-30	1.83028e-28	59.0412
KIF18B	0.870309	-0.501601	14.7786	1.32986e-30	1.88812e-28	59.0033
LOC100128851	0.896272	1.75357	14.7707	1.39371e-30	1.96473e-28	58.9568
XLOC_004572	1.1252	-0.248724	14.7609	1.47645e-30	2.06651e-28	58.8996
FAM22A	0.644663	-1.88019	14.7597	1.4867e-30	2.06651e-28	58.8928
ZAN	0.942678	-0.843246	14.7263	1.80939e-30	2.49759e-28	58.698
PCDHB8	1.05964	-2.4099	14.7148	1.93561e-30	2.65339e-28	58.6312
PTGER1	1.19515	-2.47025	14.7035	2.06886e-30	2.80932e-28	58.5652
KCNC4	1.10757	2.16911	14.7028	2.07763e-30	2.80932e-28	58.561
NMNAT2	1.79267	-2.45382	14.6883	2.26273e-30	3.03894e-28	58.4764
SPDYE4	1.05271	-2.19738	14.676	2.43218e-30	3.24459e-28	58.4048
CEND1	1.20091	0.406698	14.6571	2.71957e-30	3.60379e-28	58.2941
TNNI2	1.15429	1.7551	14.6328	3.13798e-30	4.1307e-28	58.1522
LOC100129393	0.928154	-0.107298	14.6159	3.46541e-30	4.53171e-28	58.0539
PLA2R1	1.5029	-2.51357	14.6118	3.55068e-30	4.61287e-28	58.0298
EGFL7	1.16047	-2.13458	14.6099	3.59043e-30	4.63421e-28	58.0187
TAZ	0.643768	2.13259	14.6018	3.76599e-30	4.82946e-28	57.9714
BEST3	1.07136	-1.87475	14.5936	3.95176e-30	5.03521e-28	57.9237
SRF	0.950628	1.259	14.5915	4.00162e-30	5.06625e-28	57.9112
TRIM47	1.34368	-1.64332	14.5265	5.87037e-30	7.38514e-28	57.5313
LOC647983	1.21079	-0.137236	14.5238	5.96755e-30	7.46019e-28	57.5151
GRIK5	1.36507	-1.08445	14.4894	7.31128e-30	9.0829e-28	57.3137
MVD	0.877136	1.26307	14.4856	7.47315e-30	9.22632e-28	57.292
PIH1D2	1.41865	-2.2518	14.4604	8.67323e-30	1.06418e-27	57.1444
OR1J1	1.17018	-2.2559	14.3781	1.41097e-29	1.7206e-27	56.662
C19orf68	0.93135	0.853885	14.3699	1.48063e-29	1.79454e-27	56.6142
B3GNT8	1.02521	1.54054	14.3259	1.92151e-29	2.31478e-27	56.3558
SGCA	0.902888	-1.24214	14.3244	1.93823e-29	2.32086e-27	56.3472
MYO1A	0.893246	-0.456575	14.3054	2.16841e-29	2.58093e-27	56.236
TMEM125	0.979018	1.8014	14.2916	2.35378e-29	2.78489e-27	56.1546
DKFZP547L112	1.03085	2.46722	14.2881	2.40223e-29	2.82539e-27	56.1344
VDR	0.779172	1.22203	14.2753	2.59246e-29	3.0312e-27	56.0589
GRIN3B	-1.06518	-0.473811	-14.266	2.7392e-29	3.18404e-27	56.0043
TNR	0.861383	3.36592	14.2414	3.16871e-29	3.66189e-27	55.8599
PKDCC	0.771395	-2.1953	14.174	4.72292e-29	5.42644e-27	55.4642
RSG1	0.81861	-1.02023	14.1525	5.36562e-29	6.12945e-27	55.3377
PTK7	0.7851	-1.20387	14.1467	5.5529e-29	6.30714e-27	55.3037
XLOC_009191	0.993405	3.09352	14.123	6.39318e-29	7.2203e-27	55.164
NOG	1.59123	-0.0445535	14.1212	6.45849e-29	7.25284e-27	55.1539
LOC100652802	0.855912	-0.254065	14.1196	6.51989e-29	7.28067e-27	55.1446
FAM131A	0.938946	-1.29064	14.1021	7.23572e-29	8.03489e-27	55.0413
LOC100132244	0.811954	-1.6929	14.0614	9.21102e-29	1.01153e-26	54.802
KRTAP10-5	1.04657	-2.00671	14.0396	1.04865e-28	1.14527e-26	54.6734
DPYSL3	1.01751	2.89632	13.9876	1.42789e-28	1.55094e-26	54.3673
CX3CL1	1.07142	-1.50335	13.9712	1.57398e-28	1.6945e-26	54.2708
ADRA1A	1.17823	-1.16246	13.9709	1.57711e-28	1.6945e-26	54.2688
XLOC_l2_001537	1.01526	0.835613	13.9517	1.76722e-28	1.87846e-26	54.1559
CACNA1H	0.848203	2.25538	13.9236	2.08879e-28	2.19677e-26	53.9902
KIAA0284	1.12523	-0.847985	13.9079	2.29332e-28	2.39918e-26	53.8976
C20orf144	1.15181	-0.297178	13.8871	2.59482e-28	2.70038e-26	53.7751
XLOC_007460	1.21145	-1.73558	13.8845	2.63512e-28	2.72803e-26	53.7598
GDF1	0.842008	-1.69328	13.8594	3.06055e-28	3.11972e-26	53.6114
NPC1	-0.812332	0.57387	-13.8569	3.10592e-28	3.14981e-26	53.5969
AVPR1B	1.60146	-2.50915	13.8407	3.42041e-28	3.45114e-26	53.5012
LOC649201	1.04473	-1.08745	13.8337	3.566e-28	3.57987e-26	53.4599
CDR2L	0.73715	-1.51788	13.825	3.75457e-28	3.75023e-26	53.4088
MYBL1	-1.07311	2.37603	-13.8169	3.94008e-28	3.91288e-26	53.361
SNAR-G1	0.687649	2.3425	13.8162	3.95678e-28	3.91288e-26	53.3568
RNF125	-1.20232	0.267893	-13.8094	4.11981e-28	4.05394e-26	53.3168
HSPG2	0.606335	-0.994042	13.7919	4.57268e-28	4.47739e-26	53.2134
TERT	0.902284	3.17968	13.7867	4.71647e-28	4.59555e-26	53.1827
ATAD3B	0.737003	0.642479	13.7803	4.90056e-28	4.75163e-26	53.1447
XLOC_003383	1.46181	-2.3767	13.7792	4.93439e-28	4.76121e-26	53.1379
PCSK1N	1.1936	3.40463	13.7755	5.04191e-28	4.84145e-26	53.1165
FOXJ1	1.10339	-0.431102	13.772	5.14981e-28	4.92129e-26	53.0955
ING4	0.764345	-1.30715	13.7601	5.527e-28	5.25647e-26	53.0254
CHIC2	-0.700726	4.0627	-13.7426	6.13324e-28	5.80526e-26	52.9222
KCNMB1	1.04686	0.798137	13.7269	6.73444e-28	6.33695e-26	52.8295
ACTL8	0.880687	-1.80107	13.7263	6.75874e-28	6.33695e-26	52.826
WFS1	0.826353	0.0449336	13.7124	7.34508e-28	6.85437e-26	52.7435
ZC3HAV1L	0.63092	3.26341	13.6953	8.13293e-28	7.55412e-26	52.6424
XLOC_l2_000792	0.846968	-1.21504	13.6719	9.35099e-28	8.6451e-26	52.5041
C20orf201	0.651264	1.00584	13.6701	9.45179e-28	8.69783e-26	52.4934
NPB	0.660326	1.04873	13.6469	1.08541e-27	9.94227e-26	52.3563
LRRC19	0.936861	0.923058	13.6399	1.13175e-27	1.03192e-25	52.3148
ANKLE1	0.865816	-1.72954	13.6333	1.17702e-27	1.0683e-25	52.2759
XLOC_008163	1.05925	0.029885	13.6281	1.21432e-27	1.09714e-25	52.245
ASAP3	0.820881	-2.08976	13.585	1.57028e-27	1.41233e-25	51.9901
MFSD2B	0.949985	1.11203	13.5663	1.75566e-27	1.56733e-25	51.8795
MYOD1	0.880891	2.55044	13.566	1.75839e-27	1.56733e-25	51.8779
XLOC_009399	0.973545	-0.249273	13.5546	1.88209e-27	1.66466e-25	51.8105
KLC2	0.657929	2.65255	13.5544	1.88433e-27	1.66466e-25	51.8094
HSP90AB5P	0.674416	4.29767	13.5421	2.02791e-27	1.78357e-25	51.7365
FAM163B	0.883077	1.2359	13.541	2.04174e-27	1.78783e-25	51.7298
FAM132B	1.01873	2.0388	13.5388	2.06899e-27	1.80374e-25	51.7167
OR10H1	0.974366	-2.10029	13.5075	2.49454e-27	2.16524e-25	51.5312
LOC100652762	0.948009	1.98926	13.4908	2.75506e-27	2.38097e-25	51.4327
HP07349	0.746774	1.2376	13.4857	2.84e-27	2.44375e-25	51.4026
C9orf173	0.906955	0.114268	13.4805	2.93071e-27	2.51093e-25	51.3714
JRK	0.712451	1.15445	13.4613	3.28719e-27	2.79437e-25	51.2576
XLOC_001501	0.983028	0.499291	13.4611	3.28964e-27	2.79437e-25	51.2569
KCNC3	0.64685	4.66905	13.4521	3.47191e-27	2.9242e-25	51.2034
LY6H	1.33232	-2.67301	13.429	3.98707e-27	3.34392e-25	51.0662
LOC729454	1.02126	1.40712	13.414	4.36016e-27	3.64146e-25	50.9775
ZNF524	0.817685	1.64639	13.4069	4.55021e-27	3.78429e-25	50.9352
JMJD8	0.665372	2.27773	13.4024	4.67376e-27	3.86776e-25	50.9087
XLOC_010198	1.42421	-3.23536	13.4018	4.68949e-27	3.86776e-25	50.9053
ZNF205	0.86517	1.85359	13.3904	5.02105e-27	4.12411e-25	50.8376
CEP120	-1.06192	-1.56018	-13.3772	5.43172e-27	4.42485e-25	50.7597
ATP2B3	0.799819	-1.46266	13.3583	6.08198e-27	4.93435e-25	50.6475
ZNF664-FAM101A	0.754057	-1.74062	13.3569	6.13515e-27	4.95725e-25	50.6389
CATSPER3	0.945638	-1.77111	13.3522	6.30815e-27	5.06701e-25	50.6113
KIF3A	-1.00569	-0.479916	-13.3519	6.32197e-27	5.06701e-25	50.6092
MECR	0.824895	0.166621	13.3404	6.76983e-27	5.40418e-25	50.5413
P4HA3	0.861354	-0.838679	13.3362	6.94301e-27	5.52025e-25	50.5163
PLCB3	0.789015	0.544164	13.3174	7.77111e-27	6.15403e-25	50.4045
TOX2	1.08311	0.398449	13.3105	8.09591e-27	6.38581e-25	50.3639
XLOC_001942	0.948963	-1.36014	13.307	8.26932e-27	6.47123e-25	50.3429
CT62	0.912954	-0.361214	13.2887	9.22427e-27	7.19023e-25	50.2346
XLOC_009023	0.773472	3.01408	13.2832	9.53369e-27	7.40239e-25	50.2019
LOC100506119	0.845346	0.37803	13.2804	9.69346e-27	7.49716e-25	50.1854
ODF4	1.19652	-1.92191	13.2739	1.00817e-26	7.75131e-25	50.1464
TBCC	-0.787484	0.0970903	-13.2736	1.01001e-26	7.75131e-25	50.1446
STEAP3	0.74268	0.66484	13.2563	1.12014e-26	8.5635e-25	50.042
LOC645427	0.909666	1.29186	13.2538	1.13691e-26	8.65834e-25	50.0273
H1FNT	1.08738	-0.544363	13.2501	1.16237e-26	8.81851e-25	50.0053
C22orf24	0.941152	1.21755	13.2429	1.21357e-26	9.17188e-25	49.9626
UPB1	0.842097	0.93997	13.2315	1.299e-26	9.78036e-25	49.8951
C9orf139	0.86562	0.417488	13.2266	1.33779e-26	1.00345e-24	49.866
XLOC_012977	0.990036	-1.3892	13.2134	1.44768e-26	1.08179e-24	49.7877
SLC13A4	0.988126	-0.488619	13.1766	1.80506e-26	1.33878e-24	49.5689
ACP5	0.652605	2.70864	13.1706	1.87083e-26	1.38239e-24	49.5334
LOC286154	1.07264	-0.356232	13.1625	1.96418e-26	1.44268e-24	49.4852
LRRN2	1.25303	0.898091	13.1622	1.96693e-26	1.44268e-24	49.4838
PGP	0.759533	1.08105	13.1594	2.00057e-26	1.46196e-24	49.467
DOHH	1.07635	-0.506365	13.1571	2.02841e-26	1.47688e-24	49.4533
XLOC_l2_015641	0.616749	-0.0497204	13.1548	2.05679e-26	1.49207e-24	49.4395
TJP2	0.635889	-0.192277	13.153	2.07939e-26	1.50298e-24	49.4287
FAM169A	-1.49846	-1.70872	-13.152	2.09103e-26	1.50592e-24	49.4231
LOC646862	0.632586	0.351178	13.1435	2.20022e-26	1.57884e-24	49.3726
SEMA6C	0.61976	2.21628	13.1338	2.33253e-26	1.66776e-24	49.3148
C7	1.10321	0.254262	13.1257	2.4483e-26	1.74426e-24	49.2667
XLOC_l2_005295	0.916961	-1.54925	13.088	3.06957e-26	2.17906e-24	49.0425
ZBTB45	0.753312	1.08695	13.0783	3.25326e-26	2.29894e-24	48.9849
GPR182	0.932494	0.477951	13.0779	3.26156e-26	2.29894e-24	48.9823
XLOC_010247	1.41121	-3.90877	13.0693	3.43373e-26	2.41174e-24	48.9313
FAM25C	0.816401	-0.00759616	13.0682	3.45589e-26	2.41876e-24	48.925
GPR39	0.936155	0.796701	13.0564	3.70951e-26	2.58715e-24	48.8547
SRPK2	-0.699882	0.177105	-13.0493	3.86977e-26	2.68949e-24	48.8128
SIM1	0.848249	1.39629	13.0405	4.08061e-26	2.82614e-24	48.7602
LOC728254	1.37175	-1.84308	13.0383	4.13527e-26	2.85405e-24	48.747
REG3A	0.957192	-1.50893	13.0358	4.19651e-26	2.88518e-24	48.7324
PRKCH	-0.819595	2.70661	-13.0235	4.51818e-26	3.07809e-24	48.6592
SLC16A13	0.807736	0.326046	13.0234	4.52182e-26	3.07809e-24	48.6584
C2CD4C	0.800737	-1.06467	13.0074	4.97742e-26	3.37666e-24	48.5632
PYDC2	1.57122	-3.01838	13.0052	5.04222e-26	3.40899e-24	48.5504
OPLAH	0.646138	-1.66428	12.99	5.52478e-26	3.71e-24	48.4598
GADD45G	0.765745	-1.78356	12.98	5.86609e-26	3.92594e-24	48.4003
PSPN	0.738452	-1.54871	12.9771	5.96805e-26	3.98077e-24	48.3833
MAPK9	-0.585422	-0.0503452	-12.9758	6.01498e-26	3.99866e-24	48.3755
LOC100507505	1.05544	1.07748	12.9706	6.20538e-26	4.11148e-24	48.3446
GDF15	0.745432	2.40646	12.9686	6.2813e-26	4.14795e-24	48.3325
XLOC_011261	1.03659	-1.67459	12.9626	6.51073e-26	4.28522e-24	48.297
IL17B	1.08376	-2.44866	12.9422	7.35877e-26	4.8274e-24	48.1756
SDC4	0.856727	0.654639	12.9413	7.39846e-26	4.83747e-24	48.1702
ZNF286A	-0.837598	-1.18104	-12.9398	7.46254e-26	4.86337e-24	48.1617
PRKACA	0.772489	2.59325	12.9298	7.92427e-26	5.14741e-24	48.1022
C10orf91	0.782474	-0.229211	12.9118	8.82981e-26	5.71694e-24	47.9949
IDI1	-1.20302	2.08055	-12.9099	8.93212e-26	5.7644e-24	47.9835
MOS	1.12035	-2.21384	12.9034	9.28689e-26	5.97397e-24	47.9448
KRTAP9-1	0.824456	1.09587	12.9016	9.39061e-26	6.0212e-24	47.9338
TXNDC2	0.97775	1.58973	12.8986	9.55769e-26	6.10862e-24	47.9163
GPN1	-1.06279	-0.373857	-12.8957	9.72681e-26	6.19679e-24	47.8989
XLOC_008713	1.19462	-1.33992	12.8713	1.12619e-25	7.15187e-24	47.7537
ERV18-1	0.759394	1.33017	12.8579	1.22072e-25	7.72749e-24	47.6737
XLOC_014197	0.948291	-2.18317	12.8453	1.31602e-25	8.3043e-24	47.5992
LHB	0.784446	-1.14933	12.8438	1.32833e-25	8.35547e-24	47.59
VSIG10L	0.680723	-0.427983	12.836	1.3922e-25	8.72959e-24	47.5434
NUDT16L1	0.777324	2.33988	12.8207	1.5256e-25	9.53597e-24	47.4527
CTSL1	0.725362	1.80764	12.8137	1.59097e-25	9.91339e-24	47.4111
TMEM179	0.809696	-0.376456	12.8123	1.60526e-25	9.97114e-24	47.4022
NPAS1	0.989644	-0.0917664	12.8013	1.71445e-25	1.06163e-23	47.337
MAGEL2	1.14876	0.304284	12.7997	1.7314e-25	1.06879e-23	47.3272
KRTAP4-7	0.943694	-0.735031	12.7941	1.79061e-25	1.10192e-23	47.2939
THNSL2	0.866333	-1.04719	12.79	1.83442e-25	1.1254e-23	47.2699
RUFY4	0.672123	-0.240058	12.7892	1.84387e-25	1.12771e-23	47.2648
BCL7C	0.707542	0.609567	12.7837	1.90551e-25	1.16184e-23	47.2322
TDP1	-0.730551	-0.148781	-12.7589	2.21222e-25	1.34472e-23	47.0842
C2orf85	1.06847	0.14474	12.757	2.2372e-25	1.35576e-23	47.0731
XLOC_004643	0.866272	-0.983507	12.7433	2.42885e-25	1.4602e-23	46.9916
GNAZ	0.90534	2.17322	12.7431	2.43158e-25	1.4602e-23	46.9905
TOPORS	-1.04003	0.336781	-12.7347	2.55767e-25	1.53071e-23	46.9404
XLOC_003546	1.17798	-3.89022	12.7343	2.56441e-25	1.53071e-23	46.9378
ACTBL2	2.16131	1.53721	12.7326	2.59102e-25	1.54197e-23	46.9275
MYLPF	0.96331	-2.54952	12.729	2.6463e-25	1.56549e-23	46.9066
LHFPL3	1.17971	-2.1813	12.7202	2.7913e-25	1.64637e-23	46.8537
CDHR2	0.95238	1.12719	12.7176	2.83522e-25	1.66733e-23	46.8382
XLOC_003907	1.02048	-2.09909	12.7096	2.97392e-25	1.74374e-23	46.7909
XLOC_004248	0.805435	-1.12971	12.7044	3.0682e-25	1.79372e-23	46.7599
XLOC_000099	0.647908	-1.15104	12.701	3.13108e-25	1.82027e-23	46.7398
XLOC_000544	1.1171	-4.0676	12.701	3.13193e-25	1.82027e-23	46.7396
XCR1	0.930057	1.3929	12.6982	3.18509e-25	1.84577e-23	46.7229
CRHR1	0.77177	1.11994	12.6977	3.19468e-25	1.84595e-23	46.7199
LOC100132966	0.585353	1.26684	12.693	3.28569e-25	1.89303e-23	46.692
JOSD1	-0.987209	-0.646249	-12.6777	3.60375e-25	2.07028e-23	46.6004
KCNA6	0.775235	0.809299	12.6699	3.77608e-25	2.16023e-23	46.5541
NLGN2	0.703081	1.98293	12.6696	3.78207e-25	2.16023e-23	46.5525
FLJ42022	0.924469	-2.01251	12.6671	3.84018e-25	2.18714e-23	46.5374
NHLRC4	0.749737	-1.0571	12.6637	3.91854e-25	2.22539e-23	46.5174
OGFR	0.61062	1.63906	12.6632	3.9304e-25	2.22577e-23	46.5144
LOC643669	0.809047	0.588966	12.6412	4.48724e-25	2.52671e-23	46.383
XLOC_002275	1.04503	1.50684	12.6349	4.66103e-25	2.61715e-23	46.3454
KRTAP10-9	0.752441	2.22962	12.6327	4.7221e-25	2.64398e-23	46.3325
MTRNR2L7	0.923345	-0.353208	12.6282	4.85084e-25	2.70843e-23	46.3058
VASH2	1.0817	0.825791	12.6235	4.99142e-25	2.77912e-23	46.2775
MYBPH	1.03095	-1.84425	12.607	5.50967e-25	3.0591e-23	46.1795
FSCN2	0.782375	-1.11934	12.601	5.71328e-25	3.16331e-23	46.1435
GRM4	0.905719	-0.664258	12.5673	6.99786e-25	3.86379e-23	45.9425
LOC100130370	1.0806	-2.39902	12.5658	7.05966e-25	3.88711e-23	45.9337
POLD1	0.831888	0.754571	12.5649	7.09787e-25	3.88768e-23	45.9284
DNAL4	0.632919	-0.76784	12.5649	7.09981e-25	3.88768e-23	45.9281
CSAG3	1.37178	-2.99233	12.5639	7.14232e-25	3.90022e-23	45.9222
XLOC_013216	0.919458	-1.95583	12.5632	7.16988e-25	3.90454e-23	45.9184
AKAP5	-1.63869	0.478502	-12.5596	7.32679e-25	3.97909e-23	45.8969
GALNT9	0.724398	-0.256135	12.5475	7.88211e-25	4.26901e-23	45.8245
XLOC_014251	1.18994	0.904096	12.5445	8.02314e-25	4.32184e-23	45.8069
MMP11	0.831773	0.366133	12.5377	8.36078e-25	4.49155e-23	45.766
PLA2G2D	0.983857	0.430625	12.5367	8.40985e-25	4.50573e-23	45.7602
XLOC_l2_015148	0.765667	-1.06031	12.5342	8.537e-25	4.56156e-23	45.7454
ORAI2	0.768814	2.71272	12.5188	9.36694e-25	4.9916e-23	45.6534
CDRT15	0.807602	-1.61057	12.5162	9.51367e-25	5.05624e-23	45.638
CEBPE	0.887897	-0.666342	12.4955	1.0776e-24	5.69569e-23	45.5144
TMPRSS11E	1.17088	-2.36476	12.4951	1.08028e-24	5.69569e-23	45.512
LOC100507003	0.865528	-1.87399	12.4878	1.12847e-24	5.93402e-23	45.4687
PIWIL2	0.820275	-1.14103	12.4841	1.15426e-24	6.0536e-23	45.4463
LOC100507050	0.6747	0.761598	12.4731	1.23329e-24	6.43416e-23	45.3806
LOC440330	0.883684	2.69751	12.4696	1.25911e-24	6.55165e-23	45.3601
DDX3Y	-0.646753	1.45146	-12.456	1.36664e-24	7.09262e-23	45.2789
CTSE	0.8567	0.28932	12.4201	1.6964e-24	8.78107e-23	45.0646
LOC149773	0.766994	0.152416	12.4171	1.72756e-24	8.91915e-23	45.0465
CXorf64	0.790113	-0.664599	12.4059	1.84771e-24	9.51476e-23	44.9799
ARL4C	-0.923876	2.97954	-12.3847	2.09843e-24	1.07779e-22	44.8537
FOXB1	0.613198	0.796332	12.3519	2.5577e-24	1.3103e-22	44.6575
CDC20	0.912891	-0.956057	12.3487	2.60649e-24	1.33186e-22	44.6387
CD164L2	0.784023	-0.641196	12.3438	2.68516e-24	1.36853e-22	44.6093
SCNN1D	0.665784	2.09125	12.3379	2.78106e-24	1.41379e-22	44.5745
TNKS	-1.01528	-1.97051	-12.3361	2.81252e-24	1.42614e-22	44.5633
CSNK1A1	-1.97756	-1.34901	-12.3113	3.26501e-24	1.65136e-22	44.4154
GPSM1	0.624089	-0.241344	12.2997	3.50073e-24	1.76609e-22	44.3463
HRC	1.16058	-1.57826	12.2989	3.51859e-24	1.77061e-22	44.3413
XLOC_l2_010586	0.835377	-2.25794	12.2891	3.73111e-24	1.86809e-22	44.2831
CPNE5	0.841366	0.805823	12.2812	3.91409e-24	1.95478e-22	44.2357
RCN2	-1.62325	-1.66468	-12.2731	4.10827e-24	2.04662e-22	44.1877
SH2D2A	-1.29702	1.28513	-12.2657	4.29603e-24	2.1348e-22	44.1434
ZZEF1	-0.609225	-0.0414591	-12.2533	4.62886e-24	2.29446e-22	44.0694
RGS12	0.908318	0.197329	12.2492	4.746e-24	2.34667e-22	44.0446
XLOC_008083	0.981438	-0.128499	12.236	5.13822e-24	2.5343e-22	43.9659
OR5AS1	0.964315	-0.303089	12.2323	5.25402e-24	2.57862e-22	43.9438
NUDT8	0.745705	0.134744	12.229	5.35846e-24	2.6234e-22	43.9243
PRKAG3	0.953797	-0.987347	12.2213	5.61432e-24	2.74191e-22	43.878
ERVFRD-2	1.06047	6.68601	12.2204	5.64463e-24	2.74996e-22	43.8727
MVK	0.680295	2.94928	12.2195	5.67514e-24	2.75806e-22	43.8674
PIK3C2B	0.643836	1.31414	12.2162	5.79012e-24	2.80708e-22	43.8475
PIK3R1	-1.19487	-0.275589	-12.2	6.38324e-24	3.08291e-22	43.7508
XLOC_012598	0.789767	-1.64645	12.1998	6.39009e-24	3.08291e-22	43.7497
C16orf89	0.706458	-0.105098	12.189	6.81929e-24	3.27408e-22	43.6853
BARHL1	0.889849	-2.24862	12.1869	6.90574e-24	3.3076e-22	43.6728
IL18R1	-1.20837	0.585582	-12.1729	7.51298e-24	3.5898e-22	43.5892
LOC100505857	-1.25932	-1.6375	-12.1681	7.73168e-24	3.68544e-22	43.5608
GPATCH8	-0.742609	-0.535554	-12.1618	8.03343e-24	3.82011e-22	43.5228
TATDN3	0.649525	2.20793	12.1594	8.15078e-24	3.86666e-22	43.5085
HP	0.847847	0.63679	12.152	8.51939e-24	4.0319e-22	43.4646
HK3	0.886908	0.571848	12.1454	8.86751e-24	4.18669e-22	43.4249
PDE6C	0.750218	-0.777932	12.1432	8.98672e-24	4.23291e-22	43.4117
C19orf76	0.883844	-0.310983	12.1388	9.22472e-24	4.33474e-22	43.3858
HTR1B	0.88201	-0.924202	12.129	9.78427e-24	4.58684e-22	43.3274
ESRRA	0.596263	-0.239741	12.1278	9.8551e-24	4.60917e-22	43.3202
KCNQ4	0.939685	-0.0954391	12.1101	1.09655e-23	5.11645e-22	43.2144
EXOSC10	-1.0562	-0.548153	-12.1078	1.11177e-23	5.17531e-22	43.2007
KRTAP6-1	1.0772	-2.59507	12.1058	1.12536e-23	5.22634e-22	43.1887
XLOC_l2_002502	0.90234	0.146472	12.098	1.1795e-23	5.46503e-22	43.1421
SEC22B	-0.775113	1.393	-12.0976	1.18244e-23	5.46591e-22	43.1396
SYTL2	-1.29931	0.742024	-12.0932	1.21416e-23	5.59951e-22	43.1134
LCN9	0.884273	-1.88388	12.0766	1.34196e-23	6.17459e-22	43.0142
SCAMP5	0.81374	0.257978	12.0748	1.3563e-23	6.22616e-22	43.0036
AGTRAP	0.888516	2.78145	12.0694	1.40142e-23	6.41845e-22	42.9712
KRTAP10-10	0.610607	1.42476	12.0674	1.41803e-23	6.4796e-22	42.9595
XLOC_l2_011937	0.820743	-2.39348	12.0633	1.45361e-23	6.62694e-22	42.935
ADAMTS7	0.823041	0.312882	12.0497	1.57776e-23	7.17645e-22	42.8537
XLOC_l2_007204	0.961254	-2.58265	12.0463	1.61101e-23	7.29433e-22	42.833
TGFBR3	-1.15021	2.84429	-12.0419	1.65387e-23	7.46735e-22	42.807
ANKRD58	0.660227	-0.586801	12.0416	1.65674e-23	7.46735e-22	42.8053
FAM190B	-0.653498	1.79357	-12.041	1.66328e-23	7.47988e-22	42.8014
CEP78	-1.03165	2.80608	-12.0202	1.88428e-23	8.43554e-22	42.6777
HCRTR1	0.706427	-1.06487	12.0149	1.94601e-23	8.69233e-22	42.6458
MAT1A	0.827524	-2.57473	12.0132	1.96644e-23	8.76389e-22	42.6354
CPNE2	0.751467	-0.596932	12.0087	2.01967e-23	8.981e-22	42.6089
RIMS4	0.72057	-2.02455	11.9916	2.23872e-23	9.93281e-22	42.5069
FLJ44477	0.61604	3.70618	11.9891	2.27265e-23	1.00609e-21	42.4919
RNF19A	-0.651889	3.17306	-11.9848	2.33299e-23	1.03051e-21	42.466
FAM171A2	0.88931	-1.68311	11.9828	2.36068e-23	1.04043e-21	42.4543
MRGPRD	0.878235	-2.02493	11.9756	2.46547e-23	1.08178e-21	42.4112
SKAP2	0.997981	1.48968	11.9753	2.47085e-23	1.08178e-21	42.4091
OSMR	0.734799	-0.891272	11.9675	2.58958e-23	1.13128e-21	42.3625
LOC728671	0.786253	-0.501896	11.9663	2.60859e-23	1.13708e-21	42.3553
OR14A16	0.943849	-1.21008	11.9604	2.70168e-23	1.17508e-21	42.3205
KRBA2	0.979325	5.11257	11.9553	2.7863e-23	1.20924e-21	42.29
XLOC_010104	0.979876	-0.663998	11.9545	2.80065e-23	1.21282e-21	42.2849
P4HTM	-0.603098	-1.39246	-11.952	2.84309e-23	1.22852e-21	42.27
KRTAP4-1	0.901514	-0.706891	11.9444	2.97622e-23	1.28097e-21	42.2246
CDK5R2	0.962607	-1.18849	11.9443	2.97734e-23	1.28097e-21	42.2242
HOPX	-1.51441	-0.0188437	-11.9421	3.01737e-23	1.29538e-21	42.211
USH1C	0.876043	0.986896	11.9282	3.28161e-23	1.40276e-21	42.1278
XLOC_l2_015075	0.694729	-1.08627	11.9233	3.3794e-23	1.44147e-21	42.0987
XLOC_l2_011891	0.806517	2.35774	11.9184	3.47992e-23	1.48116e-21	42.0696
DEFB4A	1.04569	-3.24851	11.9125	3.60659e-23	1.5318e-21	42.0342
LOC283140	0.850318	-0.434314	11.9117	3.62315e-23	1.53555e-21	42.0296
SPRR2D	0.793041	-0.398673	11.8978	3.94105e-23	1.66673e-21	41.9462
CXorf49B	0.886043	-0.101425	11.8901	4.1281e-23	1.74213e-21	41.9003
BRWD1	-0.695107	1.14261	-11.8833	4.29949e-23	1.81061e-21	41.86
SIGLEC11	0.797878	0.0303283	11.8816	4.34422e-23	1.82558e-21	41.8497
HSPA12B	0.799214	0.177415	11.8679	4.71823e-23	1.97857e-21	41.7678
FAM158A	0.694284	0.347041	11.8513	5.21356e-23	2.18168e-21	41.6689
CBLB	-0.786925	2.11136	-11.8493	5.27734e-23	2.20373e-21	41.6568
GPR31	1.18481	-2.76934	11.8405	5.56663e-23	2.31229e-21	41.6039
TMCC2	1.06087	-0.851681	11.8403	5.5722e-23	2.31229e-21	41.6029
TSSK6	0.828955	-1.46239	11.8396	5.59564e-23	2.31632e-21	41.5988
CACNA1F	1.00712	-0.434572	11.8393	5.60521e-23	2.31632e-21	41.5971
FAM154A	1.80391	-2.10593	11.8389	5.61793e-23	2.31675e-21	41.5948
FYN	-0.953208	3.28986	-11.8376	5.66445e-23	2.3311e-21	41.5867
HECTD2	0.710636	-0.428288	11.8355	5.73543e-23	2.35544e-21	41.5743
BPIFA1	1.16355	-1.49609	11.835	5.75411e-23	2.35824e-21	41.5711
IVL	0.615901	2.20126	11.8322	5.85098e-23	2.393e-21	41.5545
SPACA5	0.776897	-1.73927	11.8241	6.14373e-23	2.50244e-21	41.5062
F2R	-1.31642	-1.57457	-11.813	6.56805e-23	2.6698e-21	41.44
LSS	-0.751592	-2.80698	-11.8054	6.87406e-23	2.76477e-21	41.3948
P2RY8	-0.683375	1.57604	-11.8052	6.88516e-23	2.76477e-21	41.3932
RGS22	1.18238	-2.27584	11.8047	6.90366e-23	2.76661e-21	41.3906
TMEM229A	0.814357	-1.31082	11.8017	7.03175e-23	2.81228e-21	41.3723
LOC100130539	0.851324	-0.722349	11.7867	7.69761e-23	3.0724e-21	41.2827
METTL9	0.733539	2.48973	11.7714	8.43928e-23	3.36167e-21	41.1915
BAG2	-1.2004	-2.03211	-11.765	8.77235e-23	3.48736e-21	41.1531
Q442D3	0.737678	0.552949	11.7558	9.27002e-23	3.67052e-21	41.0984
FBXL7	0.880254	-2.72925	11.7491	9.65082e-23	3.8137e-21	41.0585
PCOLCE2	0.760441	-1.16483	11.7443	9.93549e-23	3.91841e-21	41.0297
FSTL3	0.715521	-0.633167	11.7425	1.00466e-22	3.94951e-21	41.0187
SYT11	-1.43864	-1.48406	-11.7423	1.00541e-22	3.94951e-21	41.0179
GAS2L2	0.855843	0.294261	11.7239	1.12385e-22	4.40607e-21	40.9075
PICK1	0.76787	2.07457	11.6947	1.33924e-22	5.22986e-21	40.7338
XLOC_l2_007569	0.887174	-0.173977	11.684	1.42871e-22	5.54656e-21	40.6697
CEACAM19	0.659053	-0.311261	11.6764	1.49573e-22	5.78418e-21	40.6242
PLAGL1	0.679861	0.673677	11.6749	1.50975e-22	5.82704e-21	40.615
TFE3	0.80296	4.05071	11.674	1.51721e-22	5.84115e-21	40.6101
SLC28A2	0.984886	0.494635	11.6738	1.51928e-22	5.84115e-21	40.6087
ATP1A4	0.745037	1.30014	11.6629	1.62276e-22	6.21494e-21	40.5434
TH	0.685837	-0.768165	11.6611	1.64056e-22	6.26757e-21	40.5326
LOC148638	0.991212	-1.37126	11.6553	1.69808e-22	6.45369e-21	40.4984
C7orf46	-0.67046	-1.01646	-11.6501	1.75293e-22	6.64942e-21	40.4669
TOMM20	-0.592179	1.67435	-11.6495	1.75858e-22	6.65816e-21	40.4638
BST2	0.665729	1.02527	11.6461	1.79521e-22	6.78391e-21	40.4433
HAP1	0.826883	-2.08118	11.6406	1.85568e-22	6.99913e-21	40.4105
CRADD	-0.63711	-1.36915	-11.6382	1.88292e-22	7.0884e-21	40.396
XLOC_001287	0.966512	-2.52592	11.636	1.90818e-22	7.16991e-21	40.3828
B4GALNT1	0.873177	-2.15443	11.6343	1.92741e-22	7.22853e-21	40.3729
PPP1R14A	0.840992	0.197662	11.6326	1.94722e-22	7.28906e-21	40.3628
XLOC_003588	0.932483	-0.301894	11.6313	1.96331e-22	7.33547e-21	40.3546
BMP8A	0.994851	0.0309993	11.6268	2.01625e-22	7.51107e-21	40.3282
PRG3	0.628399	0.811875	11.6265	2.01993e-22	7.51107e-21	40.3264
GPC2	0.752658	0.145071	11.6264	2.02165e-22	7.51107e-21	40.3256
MAB21L2	0.849253	2.17898	11.6255	2.03284e-22	7.53859e-21	40.3201
TRIM39	-0.776494	-0.263674	-11.6218	2.07874e-22	7.69444e-21	40.298
KCTD11	0.91959	-0.268976	11.6188	2.11584e-22	7.81721e-21	40.2804
KLF3	-1.21679	0.687738	-11.5931	2.47055e-22	9.07712e-21	40.1268
ARAP2	-0.877462	0.565078	-11.5905	2.51028e-22	9.20606e-21	40.111
ANGEL2	-1.03084	-0.497303	-11.5872	2.55945e-22	9.35186e-21	40.0918
MB	1.36442	-3.52346	11.5779	2.70788e-22	9.87606e-21	40.0359
LOC100129125	1.02482	-2.69204	11.5753	2.74982e-22	1.00107e-20	40.0207
C20orf3	-0.794201	0.262936	-11.5668	2.89478e-22	1.04812e-20	39.9698
C16orf3	1.02075	-0.956512	11.5668	2.89489e-22	1.04812e-20	39.9697
PRPF39	-0.704403	-1.12012	-11.5642	2.94037e-22	1.06265e-20	39.9543
TRIM72	0.974736	-2.05799	11.5553	3.10175e-22	1.11894e-20	39.9013
LOC100507747	0.665575	0.205295	11.5548	3.11279e-22	1.12089e-20	39.8978
KBTBD2	-0.91114	-0.394005	-11.5498	3.20616e-22	1.15034e-20	39.8685
EPHX3	0.755869	1.087	11.5484	3.23516e-22	1.15865e-20	39.8596
LOC729424	0.864009	-0.537013	11.5424	3.35408e-22	1.19909e-20	39.8238
XLOC_000083	0.874319	-1.60614	11.5403	3.395e-22	1.21153e-20	39.8118
NCAPD3	-1.1898	-2.4515	-11.5397	3.40916e-22	1.21223e-20	39.8077
GNB4	1.12954	-0.0184261	11.5343	3.52176e-22	1.25004e-20	39.7755
NDRG3	0.747716	2.80137	11.5328	3.55183e-22	1.25846e-20	39.767
USP24	-1.27191	-0.48342	-11.527	3.67832e-22	1.29865e-20	39.7324
XLOC_l2_008639	0.699696	-1.99176	11.5249	3.72692e-22	1.31348e-20	39.7193
SNORA33	1.2604	1.12934	11.5212	3.80907e-22	1.34005e-20	39.6977
ZCWPW1	0.592229	1.33873	11.5197	3.84358e-22	1.34762e-20	39.6888
HIST1H2AB	0.7251	2.22782	11.517	3.90763e-22	1.36506e-20	39.6724
HACE1	-0.935374	-2.7828	-11.5154	3.9459e-22	1.37601e-20	39.6628
FLJ35024	1.22289	-1.96146	11.5063	4.16727e-22	1.45066e-20	39.6087
LOC100132850	0.809187	-1.34232	11.506	4.17542e-22	1.45096e-20	39.6067
ST8SIA3	0.863423	-0.349921	11.5044	4.21635e-22	1.46262e-20	39.5971
XLOC_008102	0.849395	0.0818335	11.5001	4.3272e-22	1.49846e-20	39.5713
XLOC_005127	0.748769	-1.45213	11.4962	4.42823e-22	1.53078e-20	39.5485
CLDN24	0.824074	1.07324	11.4956	4.44639e-22	1.53439e-20	39.5444
MBOAT1	0.744203	-0.318199	11.4911	4.56843e-22	1.57377e-20	39.5176
POLR3F	-1.23756	-1.74715	-11.4859	4.71324e-22	1.62085e-20	39.4866
AMN	0.58603	1.21959	11.4854	4.72617e-22	1.62249e-20	39.4839
SNAI2	1.00526	2.68328	11.4797	4.89059e-22	1.67604e-20	39.45
RDH13	0.707418	0.742883	11.4555	5.65991e-22	1.93635e-20	39.3052
XLOC_010927	-1.41067	-3.17495	-11.4515	5.79671e-22	1.97919e-20	39.2816
XLOC_012746	0.715255	-1.02	11.451	5.81547e-22	1.97919e-20	39.2784
GMDS	-0.982934	-0.61736	-11.4507	5.82495e-22	1.97919e-20	39.2768
AMDHD2	0.636166	-0.780204	11.4328	6.48715e-22	2.20043e-20	39.1701
SLC25A36	-1.05181	-0.0231682	-11.4271	6.71498e-22	2.27383e-20	39.1358
FGL1	0.880294	0.628799	11.4169	7.13869e-22	2.41319e-20	39.0752
XLOC_011554	0.892627	-0.809081	11.4067	7.59409e-22	2.55411e-20	39.0139
DKKL1	0.764373	0.290782	11.4018	7.82085e-22	2.62593e-20	38.9848
NGF	0.908711	-2.0529	11.3989	7.9576e-22	2.66734e-20	38.9676
CPNE7	0.778348	0.546062	11.3948	8.15937e-22	2.73037e-20	38.9428
DACT3	0.958955	-2.25398	11.3806	8.88496e-22	2.96817e-20	38.8583
PWP1	-0.910274	-0.493642	-11.3801	8.91037e-22	2.97167e-20	38.8555
SLIT3	0.683511	-2.56236	11.3782	9.01229e-22	3.00062e-20	38.8442
GPR35	0.675608	1.92633	11.3737	9.26208e-22	3.07864e-20	38.8171
KPRP	0.841328	-1.44226	11.373	9.30102e-22	3.0829e-20	38.813
XLOC_000181	1.08282	-3.62677	11.3729	9.30592e-22	3.0829e-20	38.8125
OR5C1	0.939366	-1.74836	11.3559	1.03088e-21	3.40946e-20	38.711
EPS8L2	0.881413	0.715996	11.3514	1.05953e-21	3.4984e-20	38.6839
RORA	-1.14683	2.75924	-11.348	1.08128e-21	3.56428e-20	38.6637
THEM5	0.838564	0.353519	11.3353	1.16684e-21	3.83996e-20	38.5883
THPO	0.75878	-2.74801	11.3277	1.22147e-21	4.01308e-20	38.5429
PKLR	0.807689	-1.10503	11.3264	1.23141e-21	4.03907e-20	38.5349
XLOC_005114	0.944514	-2.59081	11.3258	1.23616e-21	4.04797e-20	38.5311
PDZD2	0.682336	0.615993	11.3243	1.24685e-21	4.07627e-20	38.5225
FCHSD1	0.712536	-1.66045	11.3087	1.36966e-21	4.46495e-20	38.4295
RRP1	0.695897	0.640014	11.3087	1.37024e-21	4.46495e-20	38.429
PAFAH1B3	0.613962	0.456962	11.3066	1.38704e-21	4.51231e-20	38.417
SLC25A38	-0.731472	0.773234	-11.2902	1.53078e-21	4.97178e-20	38.3192
SHANK3	0.870829	-1.84159	11.2831	1.59812e-21	5.1736e-20	38.2766
INSRR	-1.33878	-4.31174	-11.2826	1.60257e-21	5.17956e-20	38.2738
CELF5	0.690757	-1.26844	11.2773	1.65467e-21	5.33928e-20	38.2421
XLOC_000117	1.20545	-3.45277	11.2761	1.66636e-21	5.36827e-20	38.2351
XLOC_006121	1.13256	-1.81638	11.2735	1.69357e-21	5.44709e-20	38.2191
CCL24	0.66051	-0.38272	11.2713	1.71521e-21	5.50232e-20	38.2065
LOC284072	0.773183	-0.935213	11.2703	1.72561e-21	5.52334e-20	38.2005
MAP3K10	0.85863	2.50176	11.2661	1.77016e-21	5.64774e-20	38.1753
HIST4H4	0.712644	-0.298195	11.25	1.95016e-21	6.21206e-20	38.0793
ADRA2C	0.593752	2.13297	11.2466	1.99022e-21	6.32953e-20	38.0592
C17orf72	0.631112	-0.731966	11.232	2.17356e-21	6.89056e-20	37.9718
HELT	1.09591	-3.34881	11.2267	2.2435e-21	7.10096e-20	37.9404
CHRD	0.661016	0.542156	11.2229	2.29568e-21	7.25457e-20	37.9177
ZNF831	-0.901532	-1.36782	-11.2226	2.29963e-21	7.25553e-20	37.916
JMY	-0.824664	-0.827129	-11.2156	2.39904e-21	7.55717e-20	37.874
THOC4	-0.933403	-1.60005	-11.2121	2.44989e-21	7.70515e-20	37.8532
DDX27	-0.875317	-0.662476	-11.2112	2.46406e-21	7.73747e-20	37.8475
MIDN	0.788118	2.83401	11.2026	2.5945e-21	8.13421e-20	37.7964
WNK4	0.594884	-2.12688	11.1974	2.67728e-21	8.38051e-20	37.7653
NRF1	-1.16268	-3.58324	-11.1832	2.91523e-21	9.11101e-20	37.6809
ZCCHC3	-1.06837	-1.63436	-11.1818	2.94046e-21	9.17542e-20	37.6724
MOAP1	-0.668087	0.699812	-11.1788	2.99449e-21	9.31478e-20	37.6543
XLOC_001208	0.887493	-1.16643	11.1749	3.06523e-21	9.51993e-20	37.6312
MT3	0.669893	1.10206	11.1742	3.07676e-21	9.54085e-20	37.6275
XLOC_000754	0.905864	1.59126	11.1635	3.282e-21	1.01299e-19	37.5635
COL4A1	0.762726	2.7847	11.1562	3.42974e-21	1.05695e-19	37.5199
COX5A	-1.16683	-2.44694	-11.1548	3.45892e-21	1.06429e-19	37.5115
C6orf146	0.990477	-2.26122	11.1516	3.52564e-21	1.08314e-19	37.4925
MARVELD1	0.66946	2.59524	11.1451	3.66533e-21	1.12432e-19	37.454
FGD2	0.831342	0.960652	11.1447	3.67584e-21	1.1258e-19	37.4512
SP100	0.612078	4.45675	11.1432	3.70873e-21	1.13413e-19	37.4424
NXT2	-0.768667	-0.344309	-11.1353	3.88866e-21	1.18369e-19	37.3954
FAM73B	0.606757	0.620658	11.1325	3.95504e-21	1.20205e-19	37.3787
TTC3	-0.617078	-0.0509402	-11.1269	4.08956e-21	1.24104e-19	37.3455
DIRC1	0.760419	1.29744	11.1266	4.09906e-21	1.24203e-19	37.3432
PIGT	0.623524	2.17613	11.1254	4.12719e-21	1.24865e-19	37.3364
C1orf21	-1.13579	2.51698	-11.1216	4.22315e-21	1.27574e-19	37.3137
COL20A1	0.766094	-0.123746	11.1193	4.28193e-21	1.29153e-19	37.3
TNC	0.924276	-1.02642	11.1159	4.36991e-21	1.31607e-19	37.2798
G2E3	-0.944151	0.0928458	-11.1149	4.39769e-21	1.32243e-19	37.2735
LENG9	0.681673	4.66247	11.114	4.42186e-21	1.3277e-19	37.2681
HOXA2	0.765228	-0.954167	11.0912	5.07032e-21	1.51781e-19	37.1325
PIP4K2A	-0.604915	1.44621	-11.0908	5.08308e-21	1.51935e-19	37.13
TNNT2	0.748698	1.98726	11.0858	5.23834e-21	1.5634e-19	37.1002
XLOC_004848	-1.36959	-2.81986	-11.0833	5.3183e-21	1.58251e-19	37.0852
AIM1L	0.699517	-0.392281	11.0778	5.49604e-21	1.63128e-19	37.0526
ZNHIT6	-0.629082	-0.519026	-11.0777	5.49861e-21	1.63128e-19	37.0522
ZFP1	-1.34208	-2.8459	-11.0696	5.77391e-21	1.7104e-19	37.0038
BSND	0.887095	-1.32482	11.0673	5.8544e-21	1.73167e-19	36.9901
SOCS2	-1.45352	-2.96678	-11.0669	5.8694e-21	1.73352e-19	36.9875
NLRC3	0.71462	2.7918	11.0614	6.06406e-21	1.78836e-19	36.9552
PAQR6	1.24521	0.0183003	11.0528	6.38762e-21	1.88099e-19	36.9037
PSME4	-0.822036	-1.49528	-11.0515	6.43596e-21	1.89242e-19	36.8962
EML2	0.620481	-0.194289	11.0501	6.49167e-21	1.90598e-19	36.8877
C20orf26	1.08436	-4.13149	11.0457	6.66523e-21	1.95118e-19	36.8615
TSPO2	0.729469	-1.54084	11.0435	6.75288e-21	1.97393e-19	36.8486
MAGEE1	0.681092	-0.796194	11.0403	6.88642e-21	2.01001e-19	36.8292
C8orf73	0.70141	0.614192	11.0385	6.96246e-21	2.02901e-19	36.8183
EVX1	0.669096	-0.131449	11.0382	6.97195e-21	2.02901e-19	36.817
CCDC115	-0.658279	0.122562	-11.0336	7.17052e-21	2.08071e-19	36.7891
ACTN1	0.793748	4.905	11.0316	7.25476e-21	2.10208e-19	36.7776
RAB24	0.644224	1.97143	11.0283	7.40232e-21	2.14172e-19	36.7576
IGHMBP2	0.656821	-1.56285	11.0267	7.47363e-21	2.1592e-19	36.7481
GALNT12	-0.862231	-1.33613	-11.025	7.54912e-21	2.17746e-19	36.7382
OLFML2B	0.638309	-1.59093	11.0248	7.55872e-21	2.17746e-19	36.7369
GJA4	0.699736	-1.40523	11.0225	7.66193e-21	2.204e-19	36.7235
LOC100130701	1.29089	-2.73973	11.0212	7.72396e-21	2.21863e-19	36.7155
MYF5	1.48912	-2.60686	11.017	7.92114e-21	2.27198e-19	36.6905
FOXC1	-0.947907	-4.39681	-11.0155	7.99263e-21	2.28589e-19	36.6816
PPAN-P2RY11	0.745245	-0.0826584	11.0131	8.10844e-21	2.31568e-19	36.6673
JAZF1	-0.638237	-0.527851	-11.0052	8.50126e-21	2.42091e-19	36.6205
PDE4D	-0.88854	-1.0909	-11.001	8.71868e-21	2.47927e-19	36.5954
PDGFRB	-1.73704	-3.35113	-10.9997	8.78737e-21	2.49524e-19	36.5877
SBDS	-0.633713	1.72415	-10.9943	9.08161e-21	2.57511e-19	36.555
XLOC_l2_008252	1.07801	-2.98344	10.9907	9.27961e-21	2.6275e-19	36.5337
C1QTNF3	-0.734914	0.315762	-10.9864	9.52121e-21	2.69208e-19	36.5082
GLT25D1	0.630482	1.91002	10.984	9.65943e-21	2.72728e-19	36.4939
SERPINA10	0.846474	-0.942788	10.9821	9.77264e-21	2.75533e-19	36.4824
FAM47A	-1.14851	-4.00212	-10.9758	1.01472e-20	2.85687e-19	36.4451
MRPL9	-0.812349	1.07165	-10.9739	1.02631e-20	2.88543e-19	36.4339
XLOC_003025	0.834286	-2.00045	10.9712	1.04287e-20	2.92783e-19	36.418
USP51	0.691685	1.00964	10.9694	1.05441e-20	2.95606e-19	36.4071
KCNK3	0.733303	0.848621	10.9637	1.09138e-20	3.0554e-19	36.373
NUDT13	0.722424	3.90976	10.9627	1.09754e-20	3.06832e-19	36.3674
CAB39L	-0.662183	-2.37416	-10.9581	1.12879e-20	3.15127e-19	36.3396
LOC100505625	0.771885	-2.95218	10.9556	1.14553e-20	3.19352e-19	36.325
IL17RA	0.665554	0.731764	10.9485	1.19544e-20	3.32798e-19	36.2827
ZNF821	0.616252	-1.55614	10.9451	1.22028e-20	3.38765e-19	36.2624
GPR144	0.800435	1.08308	10.9443	1.22621e-20	3.39936e-19	36.2576
KCNJ16	1.0657	-3.63803	10.9384	1.27029e-20	3.51665e-19	36.2226
LOC644649	0.804282	0.000514194	10.9348	1.29831e-20	3.58921e-19	36.201
BTNL3	0.923438	-1.51199	10.9335	1.3085e-20	3.61238e-19	36.1932
C10orf118	-1.00815	-1.77438	-10.9305	1.33191e-20	3.67189e-19	36.1756
C9orf24	0.700341	0.322168	10.9165	1.44882e-20	3.98867e-19	36.0923
KRT77	0.832003	-0.0854986	10.9119	1.4894e-20	4.09472e-19	36.0649
XLOC_004555	1.01257	-2.29307	10.9099	1.50778e-20	4.13255e-19	36.0528
LRRK1	0.813359	1.38445	10.9094	1.51214e-20	4.13437e-19	36.0499
YBX2	0.823438	-1.96333	10.9038	1.56426e-20	4.27098e-19	36.0163
KRT15	0.786587	-1.61369	10.8986	1.61372e-20	4.39396e-19	35.9855
PRSS38	0.851225	2.27642	10.8922	1.67728e-20	4.56078e-19	35.9472
CACNB3	0.658816	-1.74494	10.8865	1.73475e-20	4.71061e-19	35.9138
PARP2	-1.37952	-3.57787	-10.8829	1.77293e-20	4.80771e-19	35.8923
DDX31	-0.626055	-0.283464	-10.8796	1.80911e-20	4.89914e-19	35.8723
KIAA1751	0.838455	-2.60206	10.8754	1.85445e-20	5.0151e-19	35.8477
XLOC_l2_007767	0.791094	-2.31015	10.8714	1.89994e-20	5.13112e-19	35.8237
XLOC_004761	1.01725	-2.19543	10.8676	1.94363e-20	5.24199e-19	35.8012
ERBB2	0.658637	0.634182	10.8671	1.94994e-20	5.2519e-19	35.798
GGT6	0.877382	-0.0278589	10.8579	2.0601e-20	5.54109e-19	35.7436
SLC37A1	0.608711	0.25332	10.8553	2.09271e-20	5.62119e-19	35.728
CHRNA10	0.734058	-1.14975	10.8525	2.12864e-20	5.70228e-19	35.7111
PNMA3	0.839758	1.27396	10.8521	2.13288e-20	5.70597e-19	35.7092
SYNE1	-0.667313	2.15988	-10.8497	2.16465e-20	5.78316e-19	35.6945
NCCRP1	0.839823	0.123413	10.846	2.2136e-20	5.90601e-19	35.6724
RCN3	0.674872	0.869758	10.8457	2.21702e-20	5.90721e-19	35.6708
NR2C1	-0.749285	0.339399	-10.8418	2.26918e-20	6.03809e-19	35.6478
XLOC_002970	0.843811	-1.0707	10.8346	2.36998e-20	6.29787e-19	35.6047
CCDC81	0.747181	-1.52054	10.8312	2.41817e-20	6.41735e-19	35.5848
XLOC_001796	0.718231	-0.733002	10.8297	2.4398e-20	6.46613e-19	35.576
XLOC_008100	0.725777	0.485791	10.8239	2.52654e-20	6.68709e-19	35.5414
ACCN5	0.873775	-2.47702	10.8194	2.59689e-20	6.86416e-19	35.5142
XLOC_l2_009947	0.798202	-1.44368	10.8174	2.62801e-20	6.93066e-19	35.5024
KDM6A	-0.888601	-2.76481	-10.8153	2.66097e-20	6.98706e-19	35.49
C10orf53	0.680676	1.55073	10.815	2.66617e-20	6.99149e-19	35.4881
FBXW2	-1.12382	-1.2086	-10.8127	2.7034e-20	7.07595e-19	35.4744
NUDT16	0.683388	-0.654028	10.8125	2.7055e-20	7.07595e-19	35.4736
EXOC8	-0.595124	0.280753	-10.81	2.74762e-20	7.16725e-19	35.4583
LOC284930	0.960151	-1.11625	10.8083	2.77563e-20	7.23084e-19	35.4482
PKD1L2	0.728481	-3.09525	10.8058	2.81773e-20	7.32131e-19	35.4333
XLOC_013781	0.727063	-1.7954	10.8042	2.84486e-20	7.38216e-19	35.4238
XLOC_006245	0.942292	-2.52082	10.8029	2.86584e-20	7.42691e-19	35.4165
KLRB1	-0.930351	2.37591	-10.7927	3.04815e-20	7.88301e-19	35.3555
GPD1	0.74796	2.44355	10.7926	3.04977e-20	7.88301e-19	35.3549
XLOC_006289	0.784997	-0.174851	10.7911	3.07634e-20	7.94136e-19	35.3463
WDR47	-1.29968	-4.17936	-10.789	3.11655e-20	8.02431e-19	35.3335
ARVCF	0.718913	-0.699487	10.7837	3.21699e-20	8.2615e-19	35.3021
FADS3	0.610261	0.170076	10.7829	3.23178e-20	8.28879e-19	35.2975
S100A14	0.885264	-0.228415	10.773	3.42894e-20	8.77181e-19	35.2388
C10orf96	1.01346	-0.482277	10.7646	3.60665e-20	9.21458e-19	35.1888
FUT1	0.776335	0.147666	10.7577	3.75937e-20	9.59243e-19	35.1477
DERL2	-0.982423	-0.396822	-10.7574	3.76631e-20	9.59781e-19	35.1459
NCAM1	-1.09755	-3.52385	-10.7533	3.86018e-20	9.82442e-19	35.1215
LOC100127940	0.749319	-1.61742	10.7512	3.90999e-20	9.93848e-19	35.1088
GPRIN2	0.968627	-2.33096	10.751	3.915e-20	9.93851e-19	35.1075
ITGB1BP2	0.651581	1.10887	10.7496	3.94637e-20	1.00054e-18	35.0996
COL9A2	0.664675	-1.93008	10.7459	4.03655e-20	1.02209e-18	35.0772
GRXCR2	0.756179	-0.330456	10.739	4.20576e-20	1.06359e-18	35.0366
ACTN3	0.824407	-0.325294	10.7322	4.38204e-20	1.10676e-18	34.9959
NFKB1	-0.647128	0.165183	-10.7248	4.57996e-20	1.15528e-18	34.9521
FERMT3	0.586449	5.0421	10.7177	4.77863e-20	1.20386e-18	34.9101
PAPD5	-1.35304	-3.9595	-10.7061	5.12349e-20	1.28911e-18	34.8411
B3GNT3	0.935205	-3.17297	10.7009	5.28532e-20	1.32647e-18	34.8103
XLOC_003784	0.868032	-2.05492	10.6995	5.32992e-20	1.33346e-18	34.8019
RIN1	0.750283	0.64087	10.6994	5.33267e-20	1.33346e-18	34.8014
UHRF1BP1	-0.980099	-0.383659	-10.6994	5.33329e-20	1.33346e-18	34.8013
ZNF621	-0.585531	-0.680928	-10.6971	5.40932e-20	1.35077e-18	34.7873
FSD1	0.623561	-0.0588512	10.696	5.44329e-20	1.35754e-18	34.7811
XLOC_013167	0.767534	1.28499	10.6708	6.33245e-20	1.57732e-18	34.6312
ERLEC1	-0.723188	-1.13062	-10.6695	6.38065e-20	1.58715e-18	34.6237
TMEM57	-0.831819	-0.184635	-10.6628	6.6432e-20	1.64647e-18	34.5838
LINC00263	-1.21823	-4.42964	-10.6619	6.6796e-20	1.65343e-18	34.5783
FAM116B	0.621414	0.740356	10.6611	6.71081e-20	1.65909e-18	34.5737
NDRG2	0.650242	0.607089	10.659	6.79586e-20	1.67803e-18	34.5613
DDX23	-1.09788	-1.83457	-10.6576	6.85382e-20	1.69024e-18	34.5528
KRTAP19-7	0.692417	0.145138	10.657	6.87573e-20	1.69354e-18	34.5497
C22orf31	-2.07593	-1.36525	-10.6436	7.4509e-20	1.83067e-18	34.4701
MEGF11	0.670318	-2.15532	10.6428	7.48995e-20	1.83573e-18	34.4649
XLOC_010908	0.62563	0.018851	10.6376	7.72692e-20	1.89148e-18	34.4341
CNGB1	0.644317	-1.07285	10.6372	7.74588e-20	1.89379e-18	34.4317
PNPO	0.643056	0.770362	10.6346	7.86411e-20	1.92033e-18	34.4167
OR2AG1	1.15439	-2.41209	10.6331	7.9349e-20	1.93524e-18	34.4078
LOC646498	0.796767	-1.848	10.6268	8.24433e-20	2.00578e-18	34.3699
C20orf7	-0.732455	0.592251	-10.6259	8.28745e-20	2.01381e-18	34.3647
PNPLA5	1.07073	-3.19967	10.6253	8.31659e-20	2.01842e-18	34.3612
C9orf41	-0.622698	-1.36829	-10.6234	8.40995e-20	2.03859e-18	34.3502
OR2A5	0.668452	-1.34961	10.6231	8.42889e-20	2.04069e-18	34.348
ZNF354C	-1.00739	-2.01836	-10.6227	8.44552e-20	2.04223e-18	34.346
XAGE2B	0.858897	0.608998	10.6192	8.62629e-20	2.08088e-18	34.325
XLOC_l2_008078	0.738913	-1.43529	10.6157	8.80864e-20	2.11972e-18	34.3043
LOC100128703	0.718259	1.11719	10.6135	8.92469e-20	2.14506e-18	34.2913
LOC100132174	0.844798	-1.5104	10.6092	9.15694e-20	2.19822e-18	34.2659
OR10W1	0.949178	-2.07277	10.583	1.07162e-19	2.56018e-18	34.1102
S1PR5	-1.12602	1.11451	-10.5766	1.11348e-19	2.65698e-18	34.0722
FERD3L	0.906629	-1.99883	10.5743	1.12874e-19	2.69017e-18	34.0587
SHISA8	0.712427	1.01404	10.5721	1.14372e-19	2.7226e-18	34.0457
XLOC_002859	0.790128	1.51626	10.5679	1.1732e-19	2.78611e-18	34.0205
ARHGDIG	0.953953	-1.87177	10.5652	1.19191e-19	2.82715e-18	34.0048
LOC100288902	0.735062	-1.58982	10.563	1.20798e-19	2.86185e-18	33.9915
XLOC_004916	0.901088	-2.08302	10.562	1.21504e-19	2.87175e-18	33.9858
KRTAP10-8	0.891536	-1.77724	10.5604	1.22696e-19	2.8941e-18	33.9761
MYL7	0.712861	-1.54834	10.5572	1.25055e-19	2.94516e-18	33.9572
MED18	1.46658	-1.18756	10.5512	1.29677e-19	3.05041e-18	33.9213
XLOC_l2_001640	0.984921	-1.71312	10.5469	1.32992e-19	3.12469e-18	33.8963
XLOC_l2_008008	0.96263	-3.0485	10.546	1.33736e-19	3.13845e-18	33.8908
LOC100129721	1.52622	-3.09967	10.545	1.34515e-19	3.15301e-18	33.885
LELP1	1.12996	-2.15888	10.541	1.37824e-19	3.22297e-18	33.8609
LOC100133190	0.632585	-0.761948	10.5333	1.44318e-19	3.37087e-18	33.8153
XLOC_008539	0.728901	-2.17621	10.5315	1.45911e-19	3.40408e-18	33.8045
ADSS	-1.50666	-1.16106	-10.53	1.47169e-19	3.4294e-18	33.796
ZNF835	0.826922	-2.0341	10.5225	1.53907e-19	3.57803e-18	33.7516
XLOC_l2_012103	0.922838	-1.70707	10.5179	1.58204e-19	3.66935e-18	33.7244
LOC100292905	0.791128	-1.79373	10.5168	1.59257e-19	3.68944e-18	33.7178
GRB2	0.601825	3.12993	10.5152	1.60821e-19	3.72134e-18	33.7081
FXYD1	0.897183	-2.43152	10.5145	1.61489e-19	3.73246e-18	33.704
ACTL6B	0.97366	-1.51007	10.5121	1.63882e-19	3.77897e-18	33.6894
SCARA3	1.01492	-0.438972	10.5109	1.64995e-19	3.80024e-18	33.6827
SIGIRR	-0.6595	1.86237	-10.5103	1.65614e-19	3.81008e-18	33.679
MTERFD2	-0.829182	-0.849061	-10.5074	1.68539e-19	3.87289e-18	33.6617
SYTL3	-0.780764	0.629474	-10.5063	1.69622e-19	3.89327e-18	33.6554
ARHGEF33	-2.78716	-3.54909	-10.5025	1.73567e-19	3.97923e-18	33.6326
IQCF2	0.70382	-0.0298404	10.502	1.74097e-19	3.98678e-18	33.6296
SMARCAD1	-0.880873	1.12242	-10.5002	1.75902e-19	4.02348e-18	33.6193
WDR61	-0.707825	-0.849932	-10.4964	1.79937e-19	4.11103e-18	33.5969
PRSS8	0.774815	0.280656	10.4945	1.82073e-19	4.15507e-18	33.5852
PDLIM7	0.66606	0.817769	10.4891	1.88062e-19	4.28191e-18	33.5532
PRKCQ	-0.851	0.32171	-10.4864	1.9113e-19	4.34678e-18	33.5371
DEFB105B	0.842775	-0.658634	10.4763	2.02954e-19	4.60516e-18	33.4777
PPT2	-1.17514	-3.81628	-10.4713	2.09154e-19	4.74042e-18	33.4479
ELF1	-0.749231	5.02494	-10.4673	2.14236e-19	4.85007e-18	33.4241
FBXW9	1.11091	-3.74124	10.4648	2.17414e-19	4.91643e-18	33.4095
METTL18	-0.977322	-1.47488	-10.4642	2.18269e-19	4.93015e-18	33.4056
AHI1	-1.05823	-4.6295	-10.4607	2.22848e-19	5.02787e-18	33.3851
SETD1B	0.601659	1.37779	10.4595	2.24504e-19	5.05592e-18	33.3777
TSNAXIP1	0.797399	-2.46344	10.4594	2.246e-19	5.05592e-18	33.3773
CPNE6	1.00915	-2.48762	10.459	2.25173e-19	5.06307e-18	33.3748
IKZF5	-1.33664	-2.45202	-10.4578	2.26809e-19	5.09411e-18	33.3676
OR1F1	0.915339	-0.42603	10.4556	2.29741e-19	5.15412e-18	33.3549
SIKE1	-0.671893	0.355254	-10.4504	2.36967e-19	5.31026e-18	33.3242
ANTXR1	1.31246	-2.97695	10.4443	2.45791e-19	5.50179e-18	33.288
JAKMIP2	-1.18255	0.301714	-10.4377	2.55754e-19	5.71837e-18	33.2487
LOC286299	1.09457	-2.76397	10.4371	2.56657e-19	5.7321e-18	33.2452
FOXK1	-0.6896	-0.128165	-10.4358	2.58659e-19	5.77034e-18	33.2375
ITPR3	-1.17437	2.37108	-10.4204	2.83583e-19	6.29809e-18	33.1464
PTN	0.624422	-1.15619	10.4088	3.0398e-19	6.72851e-18	33.0776
DNAJB6	-0.591891	0.94134	-10.4015	3.17538e-19	7.0208e-18	33.0344
SLC41A1	-0.98875	-2.31501	-10.3939	3.32257e-19	7.33808e-18	32.9895
RNF2	-0.771321	-0.059073	-10.3902	3.39741e-19	7.49504e-18	32.9675
FZD9	0.708023	2.8833	10.3885	3.43133e-19	7.56148e-18	32.9577
RASAL1	1.07837	-3.38944	10.3874	3.45428e-19	7.60363e-18	32.951
SMAD7	-1.17043	-0.487689	-10.3841	3.5236e-19	7.74763e-18	32.9314
COL18A1	1.14594	2.82772	10.3792	3.6278e-19	7.96794e-18	32.9025
TPO	0.699926	-0.40929	10.3746	3.73028e-19	8.18396e-18	32.8749
UNK	-1.01897	-0.780746	-10.3729	3.76638e-19	8.25406e-18	32.8654
PITPNB	-0.989182	-0.276857	-10.3644	3.96273e-19	8.67481e-18	32.8151
GORASP1	0.589727	1.83048	10.3637	3.97916e-19	8.70119e-18	32.811
FKRP	0.610807	-0.528915	10.3606	4.0536e-19	8.85423e-18	32.7926
BNC2	-1.72427	-2.00013	-10.3592	4.08827e-19	8.92016e-18	32.7842
KRTAP5-7	0.884385	-3.16443	10.3566	4.1532e-19	9.05188e-18	32.7686
SLC30A3	0.593266	1.72227	10.3551	4.19077e-19	9.12376e-18	32.7597
RAB17	0.698267	-0.99983	10.3466	4.40945e-19	9.56841e-18	32.7093
CNTD2	0.68821	-1.42086	10.3422	4.52511e-19	9.78733e-18	32.6837
EBF4	0.771622	-0.563332	10.3385	4.62673e-19	9.97445e-18	32.6617
GTDC1	-1.00791	-3.43749	-10.3384	4.63074e-19	9.97445e-18	32.6608
IL13RA1	1.13507	0.0169696	10.3383	4.63169e-19	9.97445e-18	32.6606
BRF2	-1.22194	-3.66887	-10.3374	4.6567e-19	1.00175e-17	32.6553
HIST2H2BE	0.862024	2.9809	10.3338	4.75825e-19	1.02248e-17	32.6339
C5orf65	0.587781	0.0166051	10.3212	5.12939e-19	1.09867e-17	32.5596
GNLY	-0.960828	5.20595	-10.3125	5.40364e-19	1.15369e-17	32.508
LOC100505856	0.759892	0.880851	10.3119	5.42414e-19	1.15682e-17	32.5042
XLOC_005478	0.888062	-2.33487	10.3097	5.49496e-19	1.17067e-17	32.4914
ZNF548	-1.5425	-3.7198	-10.3088	5.52594e-19	1.17559e-17	32.4858
TSN	-0.745806	-1.28802	-10.3087	5.52987e-19	1.17559e-17	32.4851
DCAF12L2	0.874411	-2.40442	10.3028	5.72716e-19	1.21623e-17	32.4504
CES2	0.6596	2.72901	10.2941	6.03347e-19	1.27991e-17	32.3988
GZMB	-1.194	4.36652	-10.2913	6.13319e-19	1.29967e-17	32.3826
CD6	-0.79461	0.837649	-10.2904	6.16714e-19	1.30435e-17	32.3771
XLOC_007643	1.13192	-1.80964	10.2904	6.16837e-19	1.30435e-17	32.3769
CCDC112	0.866766	-0.404555	10.2881	6.25187e-19	1.3206e-17	32.3636
SPN	0.700226	2.05108	10.2878	6.265e-19	1.32197e-17	32.3615
VCPIP1	-0.588273	-0.269808	-10.2827	6.45747e-19	1.36114e-17	32.3316
UBE2S	0.760252	-0.0830442	10.2814	6.50848e-19	1.37043e-17	32.3238
RIOK2	-0.867172	-2.0963	-10.2759	6.72632e-19	1.41481e-17	32.2912
PCDHA7	0.847686	-0.729198	10.2732	6.83532e-19	1.43318e-17	32.2753
USP15	-0.896684	-1.2458	-10.2696	6.98276e-19	1.46255e-17	32.2541
XLOC_004626	0.803597	-3.54783	10.2654	7.15835e-19	1.49775e-17	32.2296
MED16	0.611061	0.814922	10.2587	7.4506e-19	1.55399e-17	32.1899
LTK	0.621819	-0.71763	10.2562	7.56339e-19	1.57586e-17	32.1751
TIGD5	0.627775	-0.0117353	10.2516	7.77482e-19	1.61822e-17	32.1478
RAVER1	0.827145	2.40172	10.2507	7.81797e-19	1.6238e-17	32.1423
ZNF383	-0.669492	-0.133679	-10.2503	7.83258e-19	1.62514e-17	32.1404
CTF1	-0.943459	-3.79434	-10.2339	8.63755e-19	1.78656e-17	32.0436
XLOC_l2_010020	1.17894	-2.65356	10.2317	8.75373e-19	1.80683e-17	32.0303
B3GNT7	-1.04759	-1.09848	-10.2278	8.96188e-19	1.84788e-17	32.0071
TOX	-1.35806	-1.8938	-10.2254	9.09093e-19	1.87061e-17	31.9929
DSCR3	-0.625175	2.03035	-10.2206	9.3562e-19	1.9232e-17	31.9645
CLTCL1	0.655253	1.55795	10.2157	9.62802e-19	1.97703e-17	31.9361
TTC39B	-0.934692	-0.693913	-10.2077	1.01035e-18	2.07252e-17	31.8884
LOC145757	0.786067	-2.36173	10.2068	1.01565e-18	2.08124e-17	31.8832
ACBD5	-0.936201	-1.83986	-10.2019	1.04566e-18	2.14053e-17	31.8544
ZFX	-1.02581	-0.752644	-10.2009	1.05207e-18	2.15145e-17	31.8483
OR2J2	1.2572	-3.12353	10.2	1.05748e-18	2.16029e-17	31.8432
GDF9	0.838276	-2.18878	10.1996	1.06038e-18	2.16399e-17	31.8405
EPB49	0.692369	2.45941	10.1978	1.07184e-18	2.18512e-17	31.8299
CDH22	0.658556	1.15909	10.192	1.1095e-18	2.25902e-17	31.7957
ZNF213	0.745145	3.21033	10.1917	1.1112e-18	2.25902e-17	31.7942
MGAT4A	-0.829805	2.84385	-10.1875	1.13961e-18	2.31379e-17	31.7692
CCDC48	0.691194	-1.96224	10.1843	1.16132e-18	2.35546e-17	31.7505
PDGFD	-1.69845	-1.84254	-10.1721	1.24924e-18	2.52606e-17	31.6783
CLEC4G	0.814127	-0.582856	10.1717	1.25167e-18	2.5284e-17	31.6763
PHF20L1	-0.647166	-1.22381	-10.1702	1.26346e-18	2.54962e-17	31.6671
CD70	0.652026	3.09494	10.1687	1.27493e-18	2.57016e-17	31.6581
XLOC_006777	0.770212	0.966506	10.1669	1.28835e-18	2.59457e-17	31.6477
MSR1	0.729463	-0.498328	10.1653	1.30035e-18	2.61611e-17	31.6386
XLOC_005570	0.84907	-1.74726	10.1644	1.30762e-18	2.62806e-17	31.633
LOC100131129	0.724256	1.35069	10.1628	1.3202e-18	2.65066e-17	31.6236
LOC100130152	0.653361	-2.06926	10.1608	1.33612e-18	2.67992e-17	31.6117
LOC100507055	0.663344	-1.82486	10.1503	1.42272e-18	2.85075e-17	31.5495
NPY	0.713698	-2.0534	10.1475	1.44647e-18	2.89541e-17	31.5331
GPR77	0.758372	0.0975153	10.1449	1.46853e-18	2.93661e-17	31.5182
CCNB1IP1	-0.687151	-1.09763	-10.1342	1.56529e-18	3.12383e-17	31.455
CDK5RAP1	-0.700174	0.529849	-10.1303	1.60249e-18	3.19486e-17	31.4317
XLOC_l2_005916	0.742038	-0.0239838	10.1207	1.69663e-18	3.37577e-17	31.3752
NFIX	0.670758	-0.387758	10.1182	1.72236e-18	3.42353e-17	31.3603
ANKRD54	-1.03287	-1.93992	-10.1128	1.77792e-18	3.52692e-17	31.3289
SNORA71A	0.612208	-0.457454	10.1079	1.83137e-18	3.62499e-17	31.2996
XLOC_014215	0.786956	-2.09799	10.1063	1.84903e-18	3.65339e-17	31.2901
CDC14A	-0.842146	2.95523	-10.1021	1.89582e-18	3.74212e-17	31.2653
XLOC_008587	0.671164	0.816596	10.101	1.90746e-18	3.76137e-17	31.2593
ACER3	0.638299	2.59694	10.1004	1.91488e-18	3.77226e-17	31.2554
SLC22A10	-1.13734	-4.07763	-10.1001	1.91832e-18	3.7753e-17	31.2537
XLOC_004526	0.870685	-2.4085	10.0968	1.95568e-18	3.84502e-17	31.2346
MTRNR2L10	0.968112	-0.997289	10.0962	1.96308e-18	3.85575e-17	31.2308
XLOC_007205	0.758516	-2.3382	10.0935	1.99503e-18	3.91463e-17	31.2148
SCUBE1	0.891586	-3.12739	10.0922	2.01039e-18	3.94087e-17	31.2073
UBXN11	0.616876	2.01243	10.0905	2.03048e-18	3.97634e-17	31.1974
EFNA2	0.798231	-0.149621	10.0887	2.05324e-18	4.01696e-17	31.1864
SNX25	-0.788868	-0.918327	-10.0867	2.07714e-18	4.05972e-17	31.1749
ARHGAP22	0.681381	-1.74689	10.0862	2.08333e-18	4.06782e-17	31.172
CRYBB3	1.15295	-1.32758	10.0854	2.09346e-18	4.08359e-17	31.1672
MRS2	-0.720715	-1.76448	-10.0847	2.10248e-18	4.09716e-17	31.1629
XLOC_010495	0.6483	-1.1832	10.0826	2.1291e-18	4.14497e-17	31.1505
DEK	1.08084	0.329547	10.0794	2.17016e-18	4.22077e-17	31.1315
C1QL2	0.646323	1.42735	10.0771	2.19954e-18	4.26956e-17	31.1182
RALYL	0.760007	-1.34899	10.0766	2.20561e-18	4.27717e-17	31.1155
LOC100507653	0.748885	-0.604497	10.0763	2.2104e-18	4.28228e-17	31.1134
XLOC_002912	0.879939	-1.16626	10.0648	2.36667e-18	4.58055e-17	31.0457
KLC3	1.18411	-3.73547	10.0624	2.40108e-18	4.64264e-17	31.0315
OTC	1.39228	-3.60835	10.0526	2.54566e-18	4.90787e-17	30.9736
LOC644961	0.687614	4.63915	10.0521	2.55234e-18	4.91598e-17	30.971
ELN	0.747952	-0.389375	10.0502	2.58173e-18	4.96778e-17	30.9596
SV2C	0.904278	-1.95711	10.047	2.6306e-18	5.05691e-17	30.9411
KLHDC7B	0.690405	1.81567	10.0456	2.65312e-18	5.09527e-17	30.9327
KIAA0930	0.730323	3.56732	10.0377	2.78101e-18	5.33057e-17	30.8861
RUFY2	-0.72469	-0.918161	-10.0297	2.91642e-18	5.58476e-17	30.839
XLOC_l2_005921	0.730504	0.186405	10.0291	2.92697e-18	5.59955e-17	30.8354
SMARCD1	-0.735684	-0.504716	-10.0277	2.9512e-18	5.64049e-17	30.8273
KLRF1	-1.19798	0.384676	-10.0264	2.97386e-18	5.67833e-17	30.8197
LOC100129840	0.881808	-0.996106	10.0219	3.05459e-18	5.82687e-17	30.7932
LAIR1	0.592595	2.79391	10.0209	3.07265e-18	5.85571e-17	30.7873
DLK2	0.641182	0.874079	10.0097	3.28508e-18	6.24259e-17	30.7212
NPR2	0.681675	-0.176903	10.0069	3.3399e-18	6.34071e-17	30.7048
SCN8A	-1.24118	-3.97358	-10.0048	3.38241e-18	6.41529e-17	30.6923
PTS	-0.948515	-0.865139	-9.99961	3.48794e-18	6.60453e-17	30.6619
CABP1	0.698841	1.00982	9.99825	3.51632e-18	6.65023e-17	30.6538
AGA	-0.71279	-1.04304	-9.99348	3.61736e-18	6.82832e-17	30.6258
EFHD2	-0.736177	3.91013	-9.98928	3.70881e-18	6.9943e-17	30.6011
SPANXN4	0.794017	-3.33419	9.98856	3.72487e-18	7.01793e-17	30.5968
XLOC_005912	0.924516	-2.47912	9.9873	3.75284e-18	7.05726e-17	30.5894
FLJ31715	-0.871934	-4.63932	-9.98646	3.77152e-18	7.08568e-17	30.5845
LOC100652996	0.73646	0.12191	9.98529	3.79784e-18	7.12839e-17	30.5776
NPM3	0.615212	-0.756271	9.97688	3.99249e-18	7.48668e-17	30.5281
AIFM3	0.696696	-0.62549	9.97649	4.0018e-18	7.49705e-17	30.5258
FOLR1	0.694212	-2.16327	9.97414	4.05805e-18	7.59527e-17	30.512
ALX1	0.825326	0.122771	9.97305	4.08443e-18	7.63747e-17	30.5056
GRHL2	-1.01571	-4.67814	-9.96898	4.18444e-18	7.80978e-17	30.4817
ITGBL1	0.93534	1.12058	9.96696	4.23489e-18	7.89652e-17	30.4698
LOC729696	-1.02071	-1.15932	-9.96538	4.27506e-18	7.96396e-17	30.4605
CMC1	-1.29742	-0.249661	-9.95876	4.44652e-18	8.26013e-17	30.4215
PLTP	0.603601	-1.73675	9.95644	4.50816e-18	8.35902e-17	30.4079
HIST3H2BB	0.64851	-1.09567	9.95301	4.60091e-18	8.52305e-17	30.3878
XLOC_001933	0.750099	-1.5272	9.94904	4.71081e-18	8.7104e-17	30.3644
GRRP1	0.724886	-0.424917	9.9488	4.71741e-18	8.71449e-17	30.363
ZSCAN5D	0.626548	-1.11245	9.94513	4.82146e-18	8.89843e-17	30.3414
PIDD	0.623535	1.45701	9.94497	4.82615e-18	8.89883e-17	30.3405
PADI6	0.78429	-2.06108	9.92981	5.28101e-18	9.71052e-17	30.2513
CD247	0.635763	1.10491	9.92798	5.33844e-18	9.78221e-17	30.2406
BGN	0.76608	0.721345	9.92794	5.33969e-18	9.78221e-17	30.2404
CAPG	0.621927	1.24287	9.92358	5.47996e-18	1.00299e-16	30.2147
C19orf80	0.840315	-2.74906	9.90523	6.11076e-18	1.11332e-16	30.1069
C16orf80	-0.870705	-1.2281	-9.90503	6.11788e-18	1.1136e-16	30.1057
KIR2DS4	-1.47126	3.04647	-9.90438	6.14142e-18	1.11616e-16	30.1019
IL20	1.022	-2.72814	9.89896	6.34244e-18	1.15131e-16	30.0701
MGC42157	0.63646	0.289532	9.89418	6.52493e-18	1.18228e-16	30.042
TSEN54	-0.596265	1.92515	-9.89114	6.64355e-18	1.20158e-16	30.0242
AES	-0.912256	1.63148	-9.89023	6.6796e-18	1.207e-16	30.0188
SCAI	-0.903311	-2.50822	-9.88996	6.69054e-18	1.20788e-16	30.0172
PAFAH1B2	-0.644216	-0.469619	-9.88974	6.69922e-18	1.20835e-16	30.0159
TUT1	0.610278	-1.24858	9.88579	6.85799e-18	1.23464e-16	29.9927
XLOC_013195	0.78611	-1.33485	9.88468	6.90325e-18	1.24065e-16	29.9862
TMEM66	-0.791248	4.06579	-9.88355	6.94972e-18	1.24787e-16	29.9796
CASZ1	-0.660386	-1.48493	-9.87741	7.20779e-18	1.29071e-16	29.9435
PIK3R2	0.587529	0.301413	9.87029	7.51884e-18	1.34399e-16	29.9017
PDCL	-1.39672	-3.00021	-9.87007	7.5285e-18	1.3444e-16	29.9004
ZNF622	-0.763585	-1.90047	-9.86978	7.54142e-18	1.3444e-16	29.8987
LOC100506403	0.882315	-3.02307	9.86859	7.59485e-18	1.35271e-16	29.8917
LRRC37BP1	0.795237	-1.0924	9.86729	7.65366e-18	1.36197e-16	29.8841
UBA2	-0.698755	-0.232452	-9.86465	7.77439e-18	1.37975e-16	29.8686
RGPD5	-1.00267	0.357933	-9.86355	7.82551e-18	1.38744e-16	29.8621
XLOC_010541	0.983403	-0.747983	9.86342	7.83172e-18	1.38744e-16	29.8613
XLOC_002077	0.906082	-1.19301	9.85683	8.14388e-18	1.44146e-16	29.8226
SAMSN1	-1.27755	0.473899	-9.85618	8.17517e-18	1.44571e-16	29.8189
ELSPBP1	0.801036	-1.52607	9.85537	8.21443e-18	1.45136e-16	29.8141
MCM2	0.647523	0.567242	9.85467	8.24879e-18	1.45614e-16	29.81
XLOC_003695	0.708347	-1.06441	9.85303	8.32929e-18	1.46904e-16	29.8004
FOXE3	0.903952	-0.729778	9.84812	8.57529e-18	1.51109e-16	29.7716
FAH	0.798861	1.53632	9.8476	8.60219e-18	1.51426e-16	29.7685
PTPRH	0.910392	-0.27109	9.84747	8.60853e-18	1.51426e-16	29.7677
CDH5	1.13639	-1.50973	9.84425	8.77458e-18	1.54211e-16	29.7488
PRAM1	0.721316	1.31155	9.84403	8.78579e-18	1.54271e-16	29.7476
RGNEF	-1.13654	-3.98862	-9.84286	8.84716e-18	1.55212e-16	29.7407
RARRES2	0.836782	-2.92321	9.84171	8.90795e-18	1.5614e-16	29.7339
MCTP2	-0.629352	2.99193	-9.84098	8.94641e-18	1.56677e-16	29.7296
BBOX1	0.81475	-0.277346	9.83692	9.1642e-18	1.60349e-16	29.7058
XLOC_000212	1.09403	-2.45238	9.83315	9.3717e-18	1.63692e-16	29.6837
OR2AG2	0.939412	-2.78032	9.82259	9.97678e-18	1.74108e-16	29.6218
ADD3	-1.0511	0.741879	-9.82161	1.0035e-17	1.74969e-16	29.616
SPDEF	0.752918	0.0642168	9.82064	1.00932e-17	1.75831e-16	29.6103
CIAPIN1	-0.811679	-1.25973	-9.81657	1.03396e-17	1.79966e-16	29.5864
SEMA5B	0.730111	-2.57415	9.81339	1.05363e-17	1.83069e-16	29.5678
LTN1	-0.596994	-1.32444	-9.81244	1.05956e-17	1.83778e-16	29.5622
NR2E1	0.811159	0.116431	9.8085	1.08462e-17	1.8796e-16	29.5391
STAG1	-1.34278	-2.95478	-9.80789	1.08856e-17	1.88479e-16	29.5355
FAM108B1	-0.867067	-1.29564	-9.80739	1.09178e-17	1.88871e-16	29.5326
GNB3	0.680246	-1.40615	9.80435	1.11158e-17	1.92129e-16	29.5148
NCK1	-0.815494	-0.283935	-9.79805	1.1539e-17	1.99098e-16	29.4778
CLEC1B	0.91805	0.917653	9.79679	1.16253e-17	2.00414e-16	29.4704
CDH4	0.780343	-0.0567337	9.79391	1.18258e-17	2.03517e-16	29.4535
CTCF	-1.19548	-1.29049	-9.79337	1.18637e-17	2.03991e-16	29.4504
TBP	-0.675033	-1.16032	-9.78934	1.21501e-17	2.08556e-16	29.4268
C11orf49	-0.613759	-0.895345	-9.78661	1.2348e-17	2.11769e-16	29.4108
RAPH1	0.597279	-1.31002	9.78551	1.24288e-17	2.12972e-16	29.4043
METAP2	-0.815773	-1.75023	-9.78394	1.25453e-17	2.14783e-16	29.3951
RTN4	0.985161	3.26157	9.77848	1.29572e-17	2.21644e-16	29.3631
YWHAG	0.757098	0.638489	9.77723	1.30538e-17	2.23104e-16	29.3558
SELK	-0.793044	1.22894	-9.77329	1.33616e-17	2.27973e-16	29.3327
CLDN19	0.731597	1.22788	9.77042	1.35906e-17	2.31483e-16	29.3159
LOC100132336	0.84147	-2.07948	9.7674	1.38361e-17	2.35462e-16	29.2982
RDH12	-1.12132	-3.80727	-9.76508	1.40272e-17	2.38511e-16	29.2846
DBF4	-0.777985	-2.67317	-9.76291	1.42091e-17	2.41397e-16	29.2719
XLOC_002517	0.955324	-1.71918	9.76164	1.43163e-17	2.43011e-16	29.2644
SHC4	0.830575	-1.79621	9.75982	1.44717e-17	2.45183e-16	29.2537
IL17C	-0.957093	-4.56974	-9.7597	1.44813e-17	2.45183e-16	29.2531
XLOC_000682	0.69653	-1.4056	9.75902	1.45406e-17	2.45977e-16	29.249
TMCC3	-1.18788	-0.633854	-9.75539	1.48561e-17	2.51101e-16	29.2278
RNASE13	-0.751461	-4.66062	-9.75505	1.48857e-17	2.51387e-16	29.2258
PCNA	-0.807986	-0.333075	-9.74416	1.58777e-17	2.67685e-16	29.162
SPINK7	0.610736	-0.990262	9.74262	1.60231e-17	2.69908e-16	29.153
FAM76A	-0.632263	-1.57409	-9.74078	1.61985e-17	2.72631e-16	29.1422
ADAM11	-0.946291	-2.59336	-9.73492	1.67697e-17	2.81768e-16	29.1079
SNORA2A	-1.17225	-1.04499	-9.73278	1.69833e-17	2.85116e-16	29.0954
RTEL1	0.704808	0.252408	9.73089	1.71748e-17	2.88087e-16	29.0843
CRIM1	-1.36019	-3.90525	-9.72791	1.74804e-17	2.92966e-16	29.0668
TP53BP2	-0.974276	-2.05439	-9.72672	1.76038e-17	2.94623e-16	29.0599
DYRK2	-0.895176	0.747534	-9.72667	1.76089e-17	2.94623e-16	29.0596
KRTAP20-1	0.846737	-0.661555	9.72238	1.80616e-17	3.0169e-16	29.0345
UBD	0.680478	-0.192127	9.71948	1.83741e-17	3.06651e-16	29.0175
SMURF1	-1.59978	-3.11194	-9.71912	1.84129e-17	3.07041e-16	29.0154
FLVCR1	-0.73661	-0.232794	-9.71681	1.86664e-17	3.10746e-16	29.0019
C19orf29	-0.732633	-2.26111	-9.7157	1.87896e-17	3.12536e-16	28.9954
C9orf78	-0.610566	3.0468	-9.71372	1.90111e-17	3.15692e-16	28.9838
DZANK1	-0.917059	-3.02502	-9.71149	1.9264e-17	3.19625e-16	28.9707
IFT52	-1.05425	-3.49184	-9.71123	1.92929e-17	3.19837e-16	28.9692
XLOC_005730	0.59914	-2.11873	9.70776	1.96931e-17	3.25974e-16	28.9489
RNF183	-0.737498	-4.35082	-9.70469	2.00539e-17	3.31624e-16	28.931
C19orf38	0.755735	3.75149	9.7044	2.00889e-17	3.31927e-16	28.9292
ZNF197	-0.837437	-2.83094	-9.70308	2.02465e-17	3.33901e-16	28.9215
LOC441239	0.593256	0.595399	9.70307	2.02473e-17	3.33901e-16	28.9215
SDCBP2	0.929875	-1.38062	9.70297	2.02588e-17	3.33901e-16	28.9209
INSIG2	-0.823817	-2.98637	-9.70224	2.03466e-17	3.35069e-16	28.9166
TADA2B	-0.798047	-0.730842	-9.70012	2.06033e-17	3.38736e-16	28.9042
IL26	0.718348	0.479479	9.69532	2.11967e-17	3.47917e-16	28.8761
XLOC_002802	0.687561	-2.31304	9.69426	2.13308e-17	3.49829e-16	28.8699
NAE1	-0.68856	-1.08527	-9.6919	2.16305e-17	3.54166e-16	28.8561
MYLK2	0.753119	-2.58405	9.69178	2.16451e-17	3.54166e-16	28.8554
PLA2G10	0.648698	-0.685138	9.69175	2.16488e-17	3.54166e-16	28.8552
DYTN	0.739697	0.312814	9.68901	2.20036e-17	3.59676e-16	28.8392
BMS1P5	-0.882525	-0.245403	-9.68752	2.21978e-17	3.62552e-16	28.8305
ZBTB11	-1.23167	-1.43456	-9.68644	2.23402e-17	3.64579e-16	28.8241
ABT1	-0.988892	-1.09052	-9.68073	2.31071e-17	3.76475e-16	28.7908
METTL14	-0.589143	-0.181804	-9.67959	2.32632e-17	3.78708e-16	28.7841
SMC5	-0.996189	0.662869	-9.67671	2.36634e-17	3.84908e-16	28.7672
C2orf48	0.721356	0.105147	9.67647	2.36969e-17	3.85138e-16	28.7658
LOC338667	0.911055	-3.31128	9.67326	2.41511e-17	3.92198e-16	28.747
SPC24	0.779899	-2.71474	9.66809	2.49003e-17	4.04035e-16	28.7168
FNBP4	-0.892159	0.5044	-9.66465	2.54117e-17	4.11998e-16	28.6967
RGS9	-1.42508	-2.2034	-9.66444	2.54423e-17	4.12102e-16	28.6955
RNF151	0.603403	2.65495	9.66433	2.54596e-17	4.12102e-16	28.6948
SPTLC1	-0.712038	-1.71025	-9.65738	2.65276e-17	4.29039e-16	28.6542
PRIM2	-0.648595	-1.76115	-9.65156	2.74553e-17	4.43322e-16	28.6202
SCN1B	0.823961	-1.99914	9.64724	2.81642e-17	4.52371e-16	28.5949
PLA2G12B	0.653008	1.22438	9.64718	2.8175e-17	4.52371e-16	28.5946
TEX13B	0.940241	0.11225	9.6451	2.85233e-17	4.57223e-16	28.5824
CLASP1	-0.590569	0.659679	-9.63666	2.99819e-17	4.80218e-16	28.5331
MAST4	0.604916	0.176648	9.63206	3.08068e-17	4.92636e-16	28.5062
ABI1	-0.781972	0.248471	-9.63107	3.09877e-17	4.9513e-16	28.5004
SEC14L2	0.669559	1.18903	9.62973	3.12349e-17	4.9868e-16	28.4926
LOC100287526	0.65246	-1.06471	9.62923	3.13264e-17	4.99739e-16	28.4897
FAM208B	-0.893299	-1.54719	-9.62771	3.16091e-17	5.03844e-16	28.4808
PPP1R15B	-0.940978	-0.33526	-9.6245	3.22135e-17	5.11836e-16	28.4621
LOC729059	0.818867	-2.9679	9.62185	3.27227e-17	5.19097e-16	28.4465
IGF2BP2	0.704465	2.29546	9.61826	3.34238e-17	5.29375e-16	28.4256
LCOR	-0.639089	-1.65194	-9.61359	3.4357e-17	5.4329e-16	28.3983
C10orf35	0.724694	0.23714	9.6134	3.43972e-17	5.43491e-16	28.3972
MMP23B	-0.741308	-1.06364	-9.61237	3.46051e-17	5.46343e-16	28.3912
ALDH3A1	-0.828322	-0.44892	-9.61151	3.47833e-17	5.4872e-16	28.3861
ALDH1L1	0.860308	-1.28357	9.61051	3.49878e-17	5.51509e-16	28.3803
ETF1	-0.777144	-0.897384	-9.61031	3.50293e-17	5.51726e-16	28.3792
GABBR1	0.608856	0.791638	9.60939	3.52204e-17	5.54296e-16	28.3738
FAM48B2	0.641246	-0.048272	9.60923	3.52545e-17	5.54394e-16	28.3728
AANAT	0.742826	-0.354542	9.60211	3.6768e-17	5.76371e-16	28.3312
RLN3	0.617113	0.38771	9.60153	3.68934e-17	5.77606e-16	28.3279
FOSL2	-0.790826	3.0685	-9.60148	3.6905e-17	5.77606e-16	28.3276
SHH	0.771654	-2.12946	9.59734	3.78161e-17	5.91402e-16	28.3034
PPY	0.696662	-2.84518	9.59293	3.88148e-17	6.05716e-16	28.2776
ZNF75A	-0.657289	-1.2156	-9.59289	3.88229e-17	6.05716e-16	28.2774
TBX2	1.05361	-2.12292	9.58853	3.98359e-17	6.21034e-16	28.252
LMX1B	0.587474	-0.227996	9.58796	3.99692e-17	6.22624e-16	28.2486
TXNDC16	-0.652616	-1.74454	-9.57071	4.42517e-17	6.85573e-16	28.148
ZNF467	-0.887704	4.9807	-9.5677	4.50454e-17	6.97327e-16	28.1304
PTPN7	-0.690132	-0.429716	-9.56386	4.60767e-17	7.11629e-16	28.108
PPP2CA	-0.72378	2.06658	-9.56092	4.68812e-17	7.23492e-16	28.0909
ARHGEF10L	0.758678	0.257484	9.5604	4.7026e-17	7.25164e-16	28.0878
LOC100128338	0.856646	-1.7746	9.55353	4.89697e-17	7.54551e-16	28.0478
TMEM217	0.780805	-2.16108	9.5504	4.98835e-17	7.67442e-16	28.0295
CRTAC1	0.936116	-3.76725	9.54795	5.06087e-17	7.77395e-16	28.0152
GATA2	0.71712	0.342581	9.54524	5.14247e-17	7.87495e-16	27.9994
PRPS2	-0.858624	-1.1162	-9.53895	5.33675e-17	8.15989e-16	27.9627
ATXN8	0.740569	-0.884146	9.53271	5.53671e-17	8.45262e-16	27.9263
PHYHIP	0.723453	-1.05923	9.53218	5.55411e-17	8.47269e-16	27.9232
XLOC_l2_010650	0.786268	-2.05561	9.53121	5.58591e-17	8.50814e-16	27.9176
TROVE2	-0.855794	0.223944	-9.52995	5.6276e-17	8.56507e-16	27.9102
DYRK1B	0.595937	2.15228	9.52337	5.84985e-17	8.88292e-16	27.8719
LBX1	-0.637084	5.70054	-9.51461	6.15999e-17	9.33247e-16	27.8208
TWISTNB	-0.870572	-2.148	-9.51437	6.1685e-17	9.33826e-16	27.8194
TMCO2	0.719887	-2.40753	9.51268	6.23023e-17	9.42452e-16	27.8096
FAM177B	1.05129	2.60909	9.51076	6.30107e-17	9.52444e-16	27.7984
DTHD1	-1.14364	0.932534	-9.5056	6.49558e-17	9.80354e-16	27.7683
CAND1	-0.969547	3.14472	-9.49823	6.78413e-17	1.02313e-15	27.7253
TMEM190	0.819507	-0.308303	9.49489	6.91869e-17	1.04263e-15	27.7059
ABCB1	-0.768355	0.877633	-9.49356	6.97318e-17	1.05004e-15	27.6981
SENP6	-1.04971	-2.98874	-9.49213	7.03218e-17	1.05813e-15	27.6898
LAYN	0.794283	-2.27256	9.49131	7.0662e-17	1.06244e-15	27.685
SARS2	-1.19869	-3.14905	-9.48851	7.1835e-17	1.07763e-15	27.6688
CPNE9	0.841524	-0.461963	9.48639	7.27406e-17	1.0904e-15	27.6564
ZNF627	-1.12887	-4.01599	-9.48586	7.29654e-17	1.09294e-15	27.6533
LMO2	0.854166	1.12757	9.48475	7.3444e-17	1.09928e-15	27.6468
RUNX3	-0.726412	3.95247	-9.47826	7.63039e-17	1.14123e-15	27.6091
C19orf39	0.626223	-2.31015	9.47501	7.77786e-17	1.16154e-15	27.5901
NUDT6	0.618262	-1.41204	9.47038	7.99284e-17	1.19275e-15	27.5632
SRPX2	0.883769	-2.98867	9.46722	8.14303e-17	1.21425e-15	27.5448
ZNF268	-0.620045	-1.0642	-9.4658	8.21129e-17	1.22351e-15	27.5365
MAPK1IP1L	-0.981094	0.597926	-9.4646	8.26925e-17	1.23122e-15	27.5295
XLOC_002705	0.801023	-0.680162	9.46157	8.41803e-17	1.25243e-15	27.5119
YY1AP1	-0.616103	0.379413	-9.46064	8.4645e-17	1.25841e-15	27.5065
C11orf34	0.713978	-2.4339	9.45729	8.63302e-17	1.28123e-15	27.487
C5orf58	-1.12862	-3.02151	-9.4572	8.63734e-17	1.28123e-15	27.4865
GK5	-0.689066	0.640427	-9.45381	8.81178e-17	1.30613e-15	27.4667
LEPREL4	0.800365	-2.84516	9.44866	9.08272e-17	1.34529e-15	27.4367
IQSEC1	-0.606881	3.19252	-9.44705	9.16898e-17	1.3557e-15	27.4274
XLOC_003630	1.04857	-3.74871	9.44697	9.17347e-17	1.3557e-15	27.4269
TLN2	0.682307	-1.13688	9.44535	9.26125e-17	1.36765e-15	27.4175
INF2	0.601079	-0.756248	9.44356	9.35964e-17	1.38013e-15	27.407
XLOC_001327	0.61665	-0.210311	9.43596	9.7875e-17	1.44108e-15	27.3628
PHLDA1	-0.891912	-4.3798	-9.43449	9.87208e-17	1.45246e-15	27.3543
ANKRA2	-0.872071	-0.607568	-9.43429	9.88367e-17	1.45309e-15	27.3532
APITD1	0.648517	-1.67114	9.42951	1.01659e-16	1.49237e-15	27.3253
TULP1	0.60021	-1.81734	9.42465	1.04603e-16	1.53445e-15	27.2971
ACRV1	0.954178	-1.70779	9.41255	1.12319e-16	1.64159e-15	27.2267
XLOC_l2_006013	0.636157	-2.06355	9.41161	1.12937e-16	1.64941e-15	27.2213
CLCNKA	0.748399	-1.92149	9.40619	1.16593e-16	1.70156e-15	27.1898
LHX9	0.683917	-2.04725	9.40462	1.17675e-16	1.71259e-15	27.1806
TOR1AIP1	-1.05621	-0.288671	-9.4046	1.17694e-16	1.71259e-15	27.1805
XLOC_006915	0.793984	-0.968001	9.40426	1.17925e-16	1.7147e-15	27.1785
LOC100506047	0.672201	-1.55146	9.40318	1.18675e-16	1.72434e-15	27.1723
AKNA	-0.592388	2.56674	-9.40235	1.19258e-16	1.73155e-15	27.1674
ROGDI	0.770552	3.77539	9.40216	1.19389e-16	1.73219e-15	27.1663
C5orf41	-0.714258	-0.330368	-9.39369	1.25484e-16	1.814e-15	27.1171
GTF3C1	-0.829576	-1.26427	-9.39259	1.26299e-16	1.82445e-15	27.1107
NDUFA9	-0.841765	-1.01115	-9.38843	1.29424e-16	1.86823e-15	27.0865
NEUROG3	0.71443	2.0848	9.37959	1.36327e-16	1.9636e-15	27.0351
C19orf6	-0.63424	-0.0382417	-9.37741	1.38078e-16	1.98595e-15	27.0225
EXOG	-0.684199	-1.27362	-9.37218	1.4239e-16	2.04352e-15	26.9921
TCTN1	0.9219	0.260441	9.3694	1.44731e-16	2.07384e-15	26.976
PARP6	-0.687183	0.41873	-9.3623	1.50895e-16	2.1578e-15	26.9347
SLC35A3	-0.798086	-2.46168	-9.3544	1.58053e-16	2.25368e-15	26.8889
XLOC_l2_007770	0.670533	-1.5911	9.35247	1.59855e-16	2.2761e-15	26.8777
HNRNPA0	-1.38802	-2.11979	-9.35077	1.6146e-16	2.29731e-15	26.8678
PRODH	0.91274	0.465743	9.34435	1.67663e-16	2.38215e-15	26.8305
METTL7B	1.19747	-1.63106	9.34265	1.69341e-16	2.40256e-15	26.8207
OLIG1	1.11595	-1.55939	9.33851	1.73505e-16	2.45813e-15	26.7967
FIGNL1	-1.07257	-2.95042	-9.33194	1.80328e-16	2.55115e-15	26.7585
ZNF675	-0.89462	5.80664	-9.32969	1.82728e-16	2.58328e-15	26.7455
RALGAPB	-0.625948	0.684434	-9.32333	1.89672e-16	2.67763e-15	26.7086
PTGER4	-0.748219	0.998338	-9.32176	1.91434e-16	2.70059e-15	26.6994
ATG2B	-0.658077	-1.00723	-9.3196	1.93876e-16	2.73116e-15	26.6869
FBXO8	-0.823281	-0.766656	-9.31863	1.94977e-16	2.74472e-15	26.6813
CNDP2	0.715971	2.42416	9.31793	1.9578e-16	2.75287e-15	26.6772
CAPN13	1.1069	-3.19412	9.31788	1.95832e-16	2.75287e-15	26.677
TRIM59	-0.967878	-2.6338	-9.30883	2.06516e-16	2.89283e-15	26.6245
PTPLB	-0.878353	-0.67956	-9.30373	2.12787e-16	2.97648e-15	26.5949
PKIG	0.610265	-0.536718	9.30034	2.17059e-16	3.03129e-15	26.5752
FAM126B	-0.689109	0.294413	-9.30025	2.17163e-16	3.03129e-15	26.5747
XLOC_002303	1.03485	-3.26638	9.29617	2.2242e-16	3.10249e-15	26.5511
LARS2	-0.680328	-1.44317	-9.29305	2.26527e-16	3.15756e-15	26.533
SERTAD1	-1.06877	-1.31365	-9.29004	2.30567e-16	3.21162e-15	26.5155
S1PR1	-1.22112	2.60689	-9.28941	2.31416e-16	3.22118e-15	26.5119
XLOC_004844	0.683655	-1.82413	9.28672	2.35092e-16	3.27007e-15	26.4963
KCNAB3	0.617987	0.388002	9.28037	2.44005e-16	3.39167e-15	26.4595
HNRPLL	-0.755753	-0.376073	-9.28013	2.44351e-16	3.39411e-15	26.4581
LOC401433	0.861275	-1.20912	9.27828	2.4702e-16	3.42639e-15	26.4474
TMED10	-0.725693	1.48979	-9.27055	2.58468e-16	3.57521e-15	26.4026
MAN1A1	-1.30035	-0.960168	-9.26505	2.66927e-16	3.68452e-15	26.3707
CALHM3	1.00402	-2.72172	9.2642	2.68253e-16	3.69769e-15	26.3658
GINS4	-0.975648	-4.06352	-9.26375	2.68975e-16	3.70507e-15	26.3632
ADHFE1	-0.645737	1.819	-9.26344	2.69454e-16	3.7091e-15	26.3614
KIF27	0.664651	0.410202	9.25885	2.76806e-16	3.80766e-15	26.3348
FOLR2	0.596572	-0.543022	9.25816	2.77921e-16	3.82036e-15	26.3308
XLOC_l2_010422	0.870652	-2.77691	9.25705	2.79729e-16	3.8399e-15	26.3244
ADRBK2	0.609971	0.572378	9.25541	2.82434e-16	3.87168e-15	26.3149
TXK	-0.891219	0.105636	-9.25446	2.84015e-16	3.89067e-15	26.3094
SEC22C	-0.668866	0.241065	-9.25034	2.90943e-16	3.98009e-15	26.2856
XLOC_000508	0.737814	-0.553285	9.245	3.00191e-16	4.10378e-15	26.2546
FAM199X	-0.746164	-1.68633	-9.23767	3.13344e-16	4.27476e-15	26.2122
XLOC_011131	0.652169	-1.07932	9.23259	3.22814e-16	4.39793e-15	26.1828
XLOC_008033	0.722284	0.0556978	9.23116	3.25526e-16	4.4288e-15	26.1745
LTC4S	0.839964	-2.67335	9.23082	3.26168e-16	4.4345e-15	26.1726
INTS12	-0.719808	0.573001	-9.22158	3.443e-16	4.65872e-15	26.1191
GALR2	0.712538	-2.5253	9.21646	3.54759e-16	4.79045e-15	26.0895
ZFP161	-0.799905	-1.73115	-9.2115	3.65207e-16	4.92484e-15	26.0608
PAPD4	-0.900819	-0.452764	-9.21134	3.65553e-16	4.92617e-15	26.0599
ARHGAP25	-0.610211	2.86085	-9.21037	3.67627e-16	4.95076e-15	26.0543
SLTM	-0.876601	-0.60194	-9.20882	3.70994e-16	4.99246e-15	26.0453
CSNK1G3	-0.59528	-1.64627	-9.20871	3.71226e-16	4.99246e-15	26.0447
ESP33	0.835005	-2.16536	9.20546	3.78356e-16	5.07804e-15	26.0259
COQ10B	-0.797068	0.989609	-9.20498	3.79413e-16	5.08879e-15	26.0231
XLOC_l2_015101	0.604	-1.76544	9.20215	3.85748e-16	5.17027e-15	26.0067
ENTPD8	0.615079	0.677934	9.19245	4.08269e-16	5.46476e-15	25.9506
USP47	-0.637337	0.412702	-9.19153	4.10453e-16	5.49029e-15	25.9454
PDIK1L	-0.585392	-1.69188	-9.18509	4.2621e-16	5.69723e-15	25.9081
AGPAT4	-0.600177	1.44818	-9.18483	4.26856e-16	5.70202e-15	25.9066
NEGR1	0.694093	-3.0775	9.1826	4.32459e-16	5.773e-15	25.8937
EVPL	0.900581	-3.46573	9.18127	4.35851e-16	5.81047e-15	25.886
RBPJL	-1.16347	-1.2986	-9.1791	4.41413e-16	5.87674e-15	25.8735
KIAA1984	0.621421	-1.17318	9.17235	4.59161e-16	6.10484e-15	25.8345
TCTN3	-0.754552	-1.58052	-9.16364	4.83143e-16	6.41512e-15	25.7842
WIBG	0.603453	0.687223	9.16121	4.90046e-16	6.50243e-15	25.7702
ZNHIT3	-0.614807	0.513201	-9.15888	4.96778e-16	6.58736e-15	25.7567
MED4	-0.619166	0.604524	-9.15261	5.15296e-16	6.81927e-15	25.7205
GPHB5	0.94184	-2.67352	9.13981	5.55306e-16	7.33409e-15	25.6466
XLOC_000681	0.825729	-3.85969	9.13673	5.65396e-16	7.44757e-15	25.6288
GHITM	-0.625931	-0.0385957	-9.13433	5.73352e-16	7.54672e-15	25.615
FGF17	0.653658	-2.38709	9.13423	5.73683e-16	7.54672e-15	25.6144
HRASLS	0.629721	-0.00623757	9.13144	5.83102e-16	7.66048e-15	25.5983
LEPREL1	0.824072	-2.69343	9.13032	5.86942e-16	7.70584e-15	25.5918
HOMER3	0.737402	0.420349	9.12113	6.19276e-16	8.11427e-15	25.5388
ZNF639	0.589148	0.196557	9.11875	6.27967e-16	8.21731e-15	25.525
SYT3	0.889561	-3.19731	9.11301	6.49356e-16	8.48602e-15	25.4919
ZBED6	-1.0898	0.321805	-9.10863	6.66152e-16	8.6941e-15	25.4667
CCDC8	0.593737	-3.17847	9.10804	6.68453e-16	8.71269e-15	25.4633
KY	0.700303	-3.00597	9.10565	6.77832e-16	8.81758e-15	25.4495
ATIC	-1.06237	-0.731381	-9.10541	6.78794e-16	8.82432e-15	25.4481
LOC652119	0.683411	-0.231962	9.10504	6.80237e-16	8.8373e-15	25.446
ABCG8	0.674082	0.464613	9.10396	6.84539e-16	8.88738e-15	25.4398
CRYGA	0.93739	-3.90609	9.09825	7.07728e-16	9.15854e-15	25.4068
C1QTNF5	0.721651	-1.54782	9.09725	7.11889e-16	9.20639e-15	25.401
DCUN1D2	-0.783354	-1.66403	-9.09102	7.38225e-16	9.5222e-15	25.3651
METTL21CP1	0.913604	-2.33837	9.09028	7.41414e-16	9.55093e-15	25.3609
CAPN2	-0.628923	1.65618	-9.09006	7.42357e-16	9.55689e-15	25.3596
TMEM2	-0.633243	1.12465	-9.08624	7.59082e-16	9.76587e-15	25.3376
ZNF571	-1.19853	-1.70376	-9.08437	7.67435e-16	9.86695e-15	25.3268
SEMA3F	0.766505	-2.44191	9.07733	7.99572e-16	1.02602e-14	25.2862
ARHGEF19	-0.881516	-2.76222	-9.07596	8.0596e-16	1.03355e-14	25.2784
KCNJ11	1.06953	-3.10109	9.07574	8.06991e-16	1.03421e-14	25.2771
CHST10	-0.766166	-1.42844	-9.07336	8.18274e-16	1.04799e-14	25.2634
GIPR	0.689069	-2.11415	9.06862	8.41217e-16	1.07599e-14	25.2361
GPHA2	0.589274	-1.96526	9.06417	8.63297e-16	1.10281e-14	25.2105
ETV4	0.671873	-1.88435	9.06159	8.76412e-16	1.11885e-14	25.1956
LOC100507373	0.627725	-0.0964067	9.06123	8.7825e-16	1.12047e-14	25.1935
XLOC_002368	0.96562	-3.55568	9.05218	9.25763e-16	1.17807e-14	25.1414
VSIG2	0.804904	0.158728	9.04689	9.54747e-16	1.21417e-14	25.1109
XLOC_008793	0.924063	-2.93692	9.04036	9.91775e-16	1.25567e-14	25.0733
LOC158960	0.793886	-2.55071	9.04036	9.91798e-16	1.25567e-14	25.0733
WEE1	-1.26455	-4.15482	-9.03611	1.01661e-15	1.28627e-14	25.0489
XLOC_l2_008088	0.938658	-2.33314	9.03408	1.0287e-15	1.30073e-14	25.0372
KLRD1	-0.991625	2.59732	-9.03078	1.04868e-15	1.32263e-14	25.0182
LOC286238	0.713531	0.634253	9.02973	1.05511e-15	1.32989e-14	25.0122
PTGER2	-0.977398	3.2582	-9.02839	1.06338e-15	1.33947e-14	25.0044
IFNA4	1.03193	-1.15229	9.02334	1.0951e-15	1.37768e-14	24.9754
SLC38A5	0.632862	0.218248	9.01887	1.12398e-15	1.41222e-14	24.9497
MAP6	0.5866	1.17704	9.01707	1.13583e-15	1.4253e-14	24.9393
TFF1	0.858098	-3.38724	9.01612	1.14209e-15	1.43226e-14	24.9339
MEAF6	-0.595128	2.60594	-9.0149	1.15026e-15	1.44159e-14	24.9268
FAM108C1	-0.884325	-4.27923	-9.0135	1.15963e-15	1.45243e-14	24.9188
OR8U1	1.10627	-3.64144	9.0101	1.18284e-15	1.48056e-14	24.8992
VBP1	-0.594811	0.271819	-9.00946	1.18725e-15	1.48515e-14	24.8956
FAM76B	-0.727844	-1.57432	-9.00656	1.20743e-15	1.50944e-14	24.8789
OTP	1.00807	-3.67006	9.0037	1.22769e-15	1.53284e-14	24.8625
PLA2G4D	0.725168	-1.40035	9.00322	1.23112e-15	1.53616e-14	24.8597
XLOC_005589	0.84432	-2.5881	9.00015	1.2533e-15	1.56285e-14	24.8421
DLG3	-1.11376	-2.57061	-8.99839	1.26625e-15	1.57603e-14	24.8319
SGSM1	-0.759892	-1.4946	-8.99415	1.29781e-15	1.61229e-14	24.8076
FLI1	-0.666398	1.50341	-8.99179	1.31574e-15	1.63252e-14	24.794
NMB	-1.11758	-3.41167	-8.99086	1.32288e-15	1.64035e-14	24.7887
GRIN1	0.740726	-3.25349	8.98741	1.34969e-15	1.67256e-14	24.7688
SLC9A8	-0.673408	-1.27473	-8.98396	1.3771e-15	1.7044e-14	24.749
MDN1	-0.73167	-1.58191	-8.98354	1.3804e-15	1.70742e-14	24.7466
DUSP26	0.885208	-1.12098	8.98325	1.38279e-15	1.70932e-14	24.7449
MTERFD1	-0.710268	0.440925	-8.97802	1.42547e-15	1.76098e-14	24.7149
SUV420H2	0.81102	-0.978142	8.97746	1.4301e-15	1.7656e-14	24.7116
NGRN	-0.779905	0.164822	-8.97648	1.43831e-15	1.77353e-14	24.706
XLOC_003913	0.709621	-0.232905	8.97637	1.43922e-15	1.77356e-14	24.7054
HARS2	-0.691485	-1.11854	-8.97605	1.44186e-15	1.7757e-14	24.7036
BRD8	-0.695232	-2.60072	-8.97586	1.44344e-15	1.77654e-14	24.7025
DUSP14	-0.864016	-2.80079	-8.97315	1.46634e-15	1.80362e-14	24.6869
CCL19	0.66111	0.298386	8.9684	1.50741e-15	1.85282e-14	24.6596
LOC100286925	-0.852637	-0.505556	-8.96831	1.50821e-15	1.85282e-14	24.6591
SCTR	0.595119	-1.3006	8.96755	1.51489e-15	1.85988e-14	24.6547
LOC100131023	1.02291	-2.64725	8.96496	1.53786e-15	1.88692e-14	24.6399
BST1	0.744103	2.50125	8.96366	1.54956e-15	1.9001e-14	24.6324
KBTBD4	-0.591514	-1.50347	-8.96171	1.56724e-15	1.91823e-14	24.6212
CASP14	0.724404	-2.37095	8.95423	1.63679e-15	1.99965e-14	24.5783
MPHOSPH8	-0.589804	-0.13263	-8.95214	1.65681e-15	2.02287e-14	24.5663
ITCH	-0.60434	-1.55957	-8.9519	1.6591e-15	2.02443e-14	24.5649
BICD2	0.64974	0.782699	8.9469	1.708e-15	2.08026e-14	24.5362
XLOC_011882	0.816814	-2.52627	8.9427	1.75017e-15	2.12901e-14	24.5121
ZFP37	-1.06695	-4.41973	-8.9385	1.79343e-15	2.17897e-14	24.488
SEMA4A	0.638804	4.02456	8.93562	1.82364e-15	2.21298e-14	24.4714
LTBR	0.858895	0.0951538	8.93548	1.82518e-15	2.21349e-14	24.4706
MED30	-0.766306	-1.44782	-8.93219	1.86031e-15	2.25198e-14	24.4518
INMT	0.82983	-3.10228	8.93054	1.87823e-15	2.27228e-14	24.4423
ADAM21	0.715498	-3.24204	8.93041	1.87961e-15	2.27257e-14	24.4416
XLOC_005144	-0.832549	-4.63854	-8.92604	1.928e-15	2.32965e-14	24.4165
TCF12	-0.880771	-0.766894	-8.92504	1.93914e-15	2.34169e-14	24.4108
XLOC_012912	0.896758	-4.32904	8.92279	1.96468e-15	2.37109e-14	24.3978
PLK2	-1.41572	-2.56572	-8.92173	1.97679e-15	2.38427e-14	24.3918
HARS	-0.627095	1.12837	-8.91657	2.03688e-15	2.45377e-14	24.3622
MAK16	-0.964663	-0.570278	-8.91249	2.08565e-15	2.5074e-14	24.3388
LOC729879	0.765981	-4.05834	8.91165	2.09592e-15	2.51726e-14	24.334
OPTC	0.71612	-2.37314	8.90778	2.14353e-15	2.57289e-14	24.3118
ATP8A1	-0.611313	-0.343762	-8.90537	2.17368e-15	2.6075e-14	24.298
PRF1	-0.821531	3.57312	-8.90499	2.17852e-15	2.61016e-14	24.2958
EIF5A2	-0.991802	-2.76699	-8.90442	2.18572e-15	2.6172e-14	24.2925
LTBP1	0.760534	-0.720875	8.90135	2.22501e-15	2.66265e-14	24.2749
DEFB107A	1.02486	-2.44166	8.88931	2.38585e-15	2.84997e-14	24.206
CEP128	-0.588985	-0.537749	-8.88851	2.39692e-15	2.86148e-14	24.2014
C1orf111	0.821901	-3.27643	8.88419	2.45776e-15	2.93058e-14	24.1766
PARP11	-0.68938	-2.56512	-8.88395	2.46124e-15	2.93298e-14	24.1752
AFAP1L1	0.959752	-3.71752	8.87831	2.54305e-15	3.02706e-14	24.1429
XLOC_010570	0.697281	-3.29319	8.87829	2.54324e-15	3.02706e-14	24.1428
ACBD6	-0.788527	1.05893	-8.87566	2.58242e-15	3.07186e-14	24.1277
JAK1	-0.765475	2.92525	-8.87448	2.60004e-15	3.09096e-14	24.121
ADAP2	0.74051	1.34033	8.86929	2.67953e-15	3.18356e-14	24.0913
XLOC_002250	0.90364	-3.15297	8.86884	2.68646e-15	3.18989e-14	24.0887
SPAG1	-0.868671	-2.29053	-8.86686	2.71752e-15	3.221e-14	24.0774
LOC100653060	-0.909113	1.89135	-8.86508	2.74567e-15	3.25242e-14	24.0672
MPP1	0.670026	1.18324	8.86484	2.74949e-15	3.255e-14	24.0658
SAMD4A	0.630997	-0.687107	8.86366	2.76837e-15	3.27347e-14	24.059
RPS16P5	-0.799324	0.974792	-8.86232	2.78999e-15	3.29706e-14	24.0514
DUOXA1	0.604777	-0.998497	8.8619	2.79665e-15	3.30101e-14	24.049
AP1S1	0.602464	0.432725	8.86173	2.7995e-15	3.30241e-14	24.048
SH3GL3	0.756079	-1.02803	8.85764	2.86656e-15	3.37751e-14	24.0246
KLK2	0.632627	-1.01772	8.84813	3.02893e-15	3.56032e-14	23.9702
RABGGTB	-0.66424	-0.832852	-8.84243	3.13055e-15	3.67114e-14	23.9376
HERC2P7	0.594465	-2.06857	8.84127	3.15174e-15	3.69382e-14	23.9309
MUC6	0.65037	-0.464	8.84051	3.16565e-15	3.70793e-14	23.9266
SNIP1	-1.2026	-2.70733	-8.83924	3.18886e-15	3.73292e-14	23.9193
CSAG1	0.588097	1.19425	8.83905	3.19247e-15	3.73495e-14	23.9182
SPANXN5	0.798772	-1.93396	8.83661	3.23777e-15	3.78349e-14	23.9043
LOC100131170	0.675886	0.147163	8.836	3.24936e-15	3.7948e-14	23.9008
SMC4	-0.688861	-0.800443	-8.83553	3.25815e-15	3.8006e-14	23.8981
TMEM91	0.596677	2.82288	8.82563	3.4503e-15	4.01532e-14	23.8415
NT5C1A	0.655289	-1.4124	8.82046	3.55509e-15	4.12859e-14	23.812
CELSR2	-0.99976	-4.19371	-8.8158	3.65226e-15	4.233e-14	23.7853
PATL2	-0.742059	2.25502	-8.81483	3.67281e-15	4.25434e-14	23.7798
TMEM40	0.836552	-0.118525	8.80954	3.78705e-15	4.38411e-14	23.7495
MYL2	1.37895	-3.59933	8.8037	3.91699e-15	4.52926e-14	23.7162
XLOC_013785	0.633309	-0.673852	8.80326	3.92715e-15	4.53837e-14	23.7136
BRS3	1.08206	-3.45583	8.7997	4.00874e-15	4.62996e-14	23.6933
COPS5	-0.709393	0.836133	-8.7992	4.02046e-15	4.63922e-14	23.6904
VARS	-0.7629	0.538486	-8.79915	4.02142e-15	4.63922e-14	23.6902
ZCCHC10	-0.594281	-1.70694	-8.79448	4.1316e-15	4.7608e-14	23.6635
CNOT8	-0.646286	0.672671	-8.78862	4.27407e-15	4.91641e-14	23.63
KIR2DL4	-1.18534	3.50898	-8.78271	4.42259e-15	5.07844e-14	23.5963
KIAA1191	-0.75461	0.533545	-8.78235	4.43183e-15	5.08612e-14	23.5942
TXNDC3	-0.780299	0.164003	-8.78145	4.45473e-15	5.10945e-14	23.5891
CYP11A1	0.672653	-1.73345	8.77133	4.72325e-15	5.41118e-14	23.5313
POU3F4	0.83755	-1.88753	8.77071	4.73997e-15	5.42722e-14	23.5278
PSMB11	0.631938	-0.612587	8.76788	4.81808e-15	5.51347e-14	23.5117
RAB44	0.690597	-0.675049	8.76137	5.0028e-15	5.71498e-14	23.4745
XLOC_006044	0.972793	-3.68243	8.76004	5.0413e-15	5.75566e-14	23.4669
COLQ	-0.941683	-3.53542	-8.75825	5.09381e-15	5.80893e-14	23.4567
BOD1	-1.08854	-3.3202	-8.75655	5.14417e-15	5.85964e-14	23.447
SEC14L4	0.62289	-3.59376	8.75155	5.29472e-15	6.02077e-14	23.4185
MAP3K7	-0.604294	-0.793637	-8.75119	5.3059e-15	6.03004e-14	23.4164
C10orf12	-0.61758	1.01457	-8.74898	5.374e-15	6.10395e-14	23.4038
RRP8	-0.616002	-1.20808	-8.74857	5.38653e-15	6.11468e-14	23.4015
TRIM10	0.637574	-3.22246	8.7475	5.42016e-15	6.14583e-14	23.3954
CLEC2L	0.969061	-3.3518	8.74524	5.49131e-15	6.21942e-14	23.3825
WTAP	-0.623707	0.0263502	-8.7363	5.78215e-15	6.53393e-14	23.3315
ENPP5	-1.26355	-1.95995	-8.73283	5.89887e-15	6.66204e-14	23.3118
CDC42SE1	-0.944314	1.959	-8.73115	5.95644e-15	6.72324e-14	23.3022
LOC100129447	0.595184	-1.11413	8.72842	6.05093e-15	6.82214e-14	23.2866
LGR6	-1.207	-1.26305	-8.72538	6.15815e-15	6.93516e-14	23.2693
PIK3R6	0.611326	1.27417	8.72201	6.27914e-15	7.06741e-14	23.2501
XLOC_005887	0.607277	-1.45329	8.72142	6.30042e-15	7.08735e-14	23.2467
LOC100132146	1.01835	-4.01596	8.72013	6.34744e-15	7.1362e-14	23.2394
NHSL1	-1.5333	-2.99356	-8.70953	6.74771e-15	7.56482e-14	23.179
IRF5	0.589311	1.65625	8.70732	6.83424e-15	7.65751e-14	23.1664
HELB	-0.854642	1.544	-8.70664	6.86082e-15	7.68296e-14	23.1626
TMEM194A	-0.598967	-1.22114	-8.70335	6.99241e-15	7.8259e-14	23.1438
LOC643327	0.766922	-1.96328	8.6953	7.32426e-15	8.1743e-14	23.098
ZXDA	-0.885068	-0.653862	-8.69343	7.40387e-15	8.24926e-14	23.0874
DOCK6	0.774987	-2.62496	8.68875	7.60601e-15	8.46498e-14	23.0608
ANKRD37	-0.709675	-1.90043	-8.68686	7.68941e-15	8.55302e-14	23.05
ZNF146	-0.90838	-1.29994	-8.68495	7.77469e-15	8.63821e-14	23.0391
TRAPPC9	0.608181	0.471904	8.6781	8.08733e-15	8.97053e-14	23.0002
DRD4	0.603402	0.4207	8.67498	8.23425e-15	9.12331e-14	22.9824
LOC100132147	0.710615	0.15417	8.67282	8.33736e-15	9.23241e-14	22.9701
GCFC1	-0.627019	3.37617	-8.67009	8.46937e-15	9.36815e-14	22.9546
SYAP1	-0.754573	0.907443	-8.6692	8.51274e-15	9.41088e-14	22.9495
MAP4K5	-1.11985	-0.810559	-8.66467	8.73795e-15	9.64913e-14	22.9238
GNAO1	-0.656475	-2.67363	-8.65756	9.10307e-15	1.00245e-13	22.8833
CD68	0.687447	3.48529	8.65695	9.13519e-15	1.00543e-13	22.8799
ARHGEF9	-0.839266	2.3484	-8.65531	9.22143e-15	1.01324e-13	22.8706
CREBBP	-0.818502	-1.81511	-8.65388	9.29765e-15	1.02048e-13	22.8624
XLOC_l2_006944	0.787281	-1.41003	8.64981	9.51846e-15	1.04414e-13	22.8393
ZFP36L2	-0.750115	3.6427	-8.64875	9.57633e-15	1.04933e-13	22.8333
NCF2	0.768288	3.23529	8.64822	9.6055e-15	1.05195e-13	22.8303
UTP15	-0.77096	-2.50073	-8.64676	9.68677e-15	1.06026e-13	22.822
XLOC_013028	0.911904	-3.81388	8.64641	9.70618e-15	1.0618e-13	22.82
XLOC_009021	0.932388	-3.24144	8.64461	9.80712e-15	1.07226e-13	22.8098
OR5A2	1.3001	-3.15342	8.64362	9.86343e-15	1.07782e-13	22.8041
ANXA10	0.681786	0.139981	8.6417	9.97274e-15	1.08917e-13	22.7932
FRMD1	0.832944	-3.15405	8.64003	1.00691e-14	1.09804e-13	22.7837
SIGLEC9	0.750921	0.485657	8.64001	1.00706e-14	1.09804e-13	22.7836
FBXO5	-0.748846	-0.842375	-8.63221	1.05327e-14	1.14591e-13	22.7393
LIPH	0.70834	-1.00599	8.62925	1.07134e-14	1.16494e-13	22.7225
SLC22A7	0.736965	-1.95508	8.62256	1.11337e-14	1.20799e-13	22.6845
FNTA	-1.1546	0.574042	-8.61858	1.13913e-14	1.23325e-13	22.6619
ETNK2	-0.662793	-4.58285	-8.61769	1.14494e-14	1.23819e-13	22.6569
REV1	-0.597844	-1.14874	-8.61452	1.16602e-14	1.2603e-13	22.6389
XLOC_000423	0.720647	-2.16477	8.61122	1.18832e-14	1.28301e-13	22.6202
DUSP3	0.624163	1.47565	8.61076	1.19148e-14	1.28573e-13	22.6175
LY6G6D	0.611	-2.38002	8.61015	1.19565e-14	1.28953e-13	22.6141
MFSD9	-0.922571	-3.38988	-8.60702	1.2174e-14	1.31085e-13	22.5963
CST7	-0.922701	4.50497	-8.60645	1.22138e-14	1.31442e-13	22.5931
RXFP3	0.59801	-1.75259	8.60507	1.23112e-14	1.32418e-13	22.5852
RNF139	-0.797945	0.326391	-8.5993	1.27257e-14	1.36541e-13	22.5525
EBAG9	-0.621262	1.64176	-8.59926	1.27288e-14	1.36541e-13	22.5523
PLAU	-0.954856	-2.26873	-8.59876	1.27652e-14	1.36857e-13	22.5495
CTPS	-0.717444	-1.37642	-8.59781	1.28351e-14	1.37458e-13	22.5441
SF3B14	-0.772312	-0.472177	-8.59532	1.30205e-14	1.39219e-13	22.5299
OTOF	0.60486	-0.678629	8.59155	1.33051e-14	1.42109e-13	22.5086
ADCYAP1R1	0.844962	-3.41357	8.59108	1.33409e-14	1.42339e-13	22.5059
RIBC1	-0.831415	-3.66071	-8.57211	1.48763e-14	1.57873e-13	22.3984
BRMS1L	-1.0382	-4.14797	-8.57187	1.4897e-14	1.58008e-13	22.397
PTPRJ	-0.686026	-1.51923	-8.56625	1.53851e-14	1.62925e-13	22.3652
SULF2	0.723479	2.17297	8.56586	1.542e-14	1.63208e-13	22.3629
LOC100131000	0.596596	-1.53888	8.5637	1.56121e-14	1.65064e-13	22.3507
OR3A3	1.02429	-3.76059	8.56076	1.58777e-14	1.67695e-13	22.3341
PLCXD2	-0.62966	-0.543276	-8.56045	1.59058e-14	1.67903e-13	22.3323
PIP5KL1	0.607411	0.110156	8.55995	1.59519e-14	1.68299e-13	22.3295
H1FOO	0.774623	-2.45072	8.55981	1.59647e-14	1.68345e-13	22.3287
FCRL6	-1.0465	2.24893	-8.5597	1.59743e-14	1.68357e-13	22.3281
AIM1	-0.712677	0.473631	-8.55915	1.60247e-14	1.68709e-13	22.325
FAM189A2	0.712624	-3.41223	8.55679	1.62437e-14	1.70834e-13	22.3116
SPAG9	-0.614835	0.294618	-8.55403	1.65029e-14	1.73468e-13	22.2959
FERMT2	0.627345	-3.00723	8.55212	1.66848e-14	1.75195e-13	22.2851
FCGR3A	-1.03589	2.06107	-8.55126	1.67675e-14	1.7597e-13	22.2802
USP8	-0.602239	2.29017	-8.55104	1.67884e-14	1.76097e-13	22.279
HERC3	-0.775497	-2.08942	-8.54481	1.73987e-14	1.82401e-13	22.2438
TIGD2	-0.843433	-4.5244	-8.54414	1.74663e-14	1.83014e-13	22.2399
HIRIP3	-1.0133	-2.95693	-8.54258	1.76231e-14	1.84559e-13	22.2311
LOC100131432	0.999082	-3.18331	8.53978	1.79079e-14	1.87246e-13	22.2153
TGM7	0.700768	-1.38795	8.53635	1.82635e-14	1.90763e-13	22.1959
TMX1	-0.606795	0.600117	-8.52695	1.92745e-14	2.00691e-13	22.1427
SEC24A	-0.614492	-2.06113	-8.52663	1.93102e-14	2.00957e-13	22.1409
DOCK11	-0.927733	-1.27373	-8.52568	1.94154e-14	2.01947e-13	22.1355
C6orf64	-1.16646	-3.78629	-8.5252	1.94693e-14	2.02401e-13	22.1328
SLC9A6	-0.836811	-1.199	-8.52316	1.96977e-14	2.04455e-13	22.1212
TEAD3	0.679528	-0.0886007	8.52206	1.98222e-14	2.05639e-13	22.115
BDP1	-0.943129	-2.03092	-8.51966	2.00963e-14	2.08374e-13	22.1015
ITPR1	-0.599831	-0.524232	-8.51946	2.01195e-14	2.08506e-13	22.1003
OR2C1	0.667342	-2.46456	8.51862	2.0217e-14	2.09407e-13	22.0956
ZNF805	-0.836296	-3.61552	-8.5156	2.05696e-14	2.12949e-13	22.0785
ACER2	0.68818	0.09827	8.51063	2.11632e-14	2.18866e-13	22.0504
LSM3	-0.677338	-1.2665	-8.50721	2.15822e-14	2.22736e-13	22.031
CMYA5	0.935179	-2.92084	8.50368	2.20233e-14	2.26934e-13	22.0111
OR1J4	0.812047	-2.81188	8.50346	2.20508e-14	2.271e-13	22.0098
NAP1L5	-1.07328	-1.49747	-8.50083	2.23847e-14	2.30301e-13	21.995
LOC100131821	0.746923	-0.999939	8.49627	2.29768e-14	2.36026e-13	21.9692
XLOC_l2_015034	0.776053	-1.45011	8.49567	2.30571e-14	2.36606e-13	21.9658
XLOC_009827	-1.06724	-4.58336	-8.49064	2.37294e-14	2.43254e-13	21.9374
DCUN1D3	-0.950646	-3.18115	-8.49031	2.37752e-14	2.43472e-13	21.9355
SMU1	-0.773942	3.69445	-8.48305	2.4783e-14	2.53271e-13	21.8945
C15orf38	1.76987	0.129979	8.48258	2.48497e-14	2.53822e-13	21.8919
C11orf91	0.721532	-2.4033	8.4813	2.50334e-14	2.55305e-13	21.8846
SLFN13	-1.11434	-3.00523	-8.48003	2.52154e-14	2.57029e-13	21.8775
XLOC_011940	0.689418	-0.473793	8.47555	2.58705e-14	2.63167e-13	21.8522
THAP9	-0.875739	-3.89909	-8.47297	2.62538e-14	2.66793e-13	21.8376
FUT8	-0.621029	-0.425568	-8.46151	2.8032e-14	2.84282e-13	21.773
XLOC_003343	0.788656	-2.85095	8.45896	2.84451e-14	2.8803e-13	21.7585
KRT33B	-1.82555	-3.53311	-8.45865	2.84945e-14	2.88237e-13	21.7568
C9orf95	-0.870595	-0.850137	-8.45705	2.87565e-14	2.90591e-13	21.7478
NRGN	0.791991	6.41813	8.45581	2.8961e-14	2.92509e-13	21.7408
VPS54	-0.914922	-1.14654	-8.45533	2.9041e-14	2.9302e-13	21.7381
PLXNA4	-0.708921	-2.44738	-8.45338	2.93657e-14	2.95845e-13	21.7271
ABLIM3	0.960884	0.634475	8.45015	2.99136e-14	3.00755e-13	21.7088
TPPP	-1.15179	-3.43157	-8.44808	3.02691e-14	3.04176e-13	21.6972
NKG7	-0.778984	4.8119	-8.44714	3.04318e-14	3.05656e-13	21.6919
ENPP4	-0.591395	-0.950047	-8.44514	3.07827e-14	3.09024e-13	21.6806
UPK1A	0.715397	-1.1337	8.44381	3.10162e-14	3.11211e-13	21.6731
CNTN3	0.887624	-3.20158	8.43861	3.19524e-14	3.20443e-13	21.6438
NPDC1	0.689249	-2.47353	8.4311	3.33524e-14	3.33474e-13	21.6014
KRT10	-0.772583	1.20172	-8.43041	3.34849e-14	3.34631e-13	21.5975
NANOS1	-0.889263	-4.63832	-8.42934	3.36893e-14	3.36497e-13	21.5915
TP53AIP1	-0.683559	-1.22337	-8.42653	3.4235e-14	3.40927e-13	21.5757
CCNDBP1	-0.661878	1.30218	-8.42595	3.43476e-14	3.41877e-13	21.5724
C17orf109	0.612935	-0.949599	8.4246	3.46139e-14	3.44354e-13	21.5648
XLOC_l2_008427	1.02034	-2.6265	8.42304	3.49238e-14	3.47264e-13	21.556
RFX4	0.817348	-4.28484	8.4225	3.50305e-14	3.48151e-13	21.553
DEFB124	0.731381	-2.25898	8.41997	3.55413e-14	3.52522e-13	21.5387
GAFA2	-1.17406	0.58186	-8.41972	3.55909e-14	3.52838e-13	21.5373
RRAS2	-0.730986	0.897162	-8.41614	3.63261e-14	3.59589e-13	21.5171
XLOC_010462	1.06595	-4.15466	8.4137	3.68364e-14	3.64458e-13	21.5034
NIM1	0.949338	-3.68945	8.40931	3.77712e-14	3.7315e-13	21.4786
PLXNB2	0.616266	3.59229	8.4087	3.79019e-14	3.74255e-13	21.4752
THAP6	-1.17634	-1.69761	-8.40825	3.79995e-14	3.74847e-13	21.4727
XLOC_l2_006021	0.639681	-2.18213	8.40703	3.8265e-14	3.77092e-13	21.4658
GPBAR1	0.589979	1.40312	8.40457	3.88068e-14	3.82052e-13	21.452
TGFB3	-0.777034	-3.28082	-8.40241	3.9288e-14	3.86406e-13	21.4398
B4GALT4	-0.732717	-1.53044	-8.40081	3.96482e-14	3.89564e-13	21.4308
CCT5	-0.85968	-3.22434	-8.39994	3.98437e-14	3.91291e-13	21.4259
ERGIC2	-0.952651	-0.62605	-8.39901	4.00556e-14	3.93178e-13	21.4207
NUP98	-0.686029	-0.866598	-8.39889	4.00832e-14	3.93254e-13	21.42
RNMT	-0.66173	-0.379589	-8.39462	4.10732e-14	4.02372e-13	21.3959
ZNF32	-0.812526	-0.291623	-8.39372	4.1284e-14	4.04237e-13	21.3909
DIP2B	-0.744633	-1.67983	-8.39113	4.18982e-14	4.09847e-13	21.3763
CIITA	0.61288	2.59457	8.38885	4.2446e-14	4.14798e-13	21.3635
HIF1A	-1.02794	1.62797	-8.38831	4.25772e-14	4.15876e-13	21.3605
ARMC2	-0.8276	-4.22628	-8.38782	4.26954e-14	4.16825e-13	21.3577
TUBA8	0.613592	0.685709	8.38741	4.27962e-14	4.17604e-13	21.3554
RASSF4	0.862718	1.96608	8.38668	4.29751e-14	4.19041e-13	21.3513
HABP4	-0.712434	0.115365	-8.38664	4.29856e-14	4.19041e-13	21.351
NAV1	0.598944	0.221672	8.38625	4.30792e-14	4.19748e-13	21.3489
XLOC_008183	0.901958	-2.41302	8.37669	4.54937e-14	4.42623e-13	21.2951
KIAA1429	-0.638515	0.904348	-8.37657	4.5525e-14	4.4271e-13	21.2944
CDKN2AIP	-0.618055	-0.668029	-8.37511	4.59041e-14	4.45961e-13	21.2862
KIAA1432	-1.04898	-2.32906	-8.37449	4.6066e-14	4.47315e-13	21.2827
NAA15	-0.94038	-2.29996	-8.37292	4.6482e-14	4.51134e-13	21.2739
XLOC_000543	0.680342	-1.92123	8.37261	4.65637e-14	4.51707e-13	21.2721
ARSI	0.710432	-2.83703	8.36827	4.77278e-14	4.62097e-13	21.2478
DSTN	-0.989609	-0.988827	-8.36732	4.7989e-14	4.63781e-13	21.2424
G3BP2	-1.02858	-0.0845741	-8.36729	4.7995e-14	4.63781e-13	21.2423
C20orf24	-0.751237	1.131	-8.3589	5.03465e-14	4.85323e-13	21.1951
SPEF2	-0.735043	-3.43671	-8.35844	5.0477e-14	4.86345e-13	21.1925
XLOC_l2_009182	-1.11589	-2.70209	-8.35718	5.08409e-14	4.89615e-13	21.1854
NKRF	-0.592395	-1.78284	-8.35415	5.17254e-14	4.97651e-13	21.1684
CREM	-0.749091	-1.58559	-8.35347	5.19257e-14	4.99336e-13	21.1646
ZBTB9	-0.750851	-0.87043	-8.34792	5.3594e-14	5.14632e-13	21.1334
CCL4	-1.63917	2.52573	-8.34553	5.4327e-14	5.21167e-13	21.12
SSTR4	0.923008	-3.78398	8.34468	5.45916e-14	5.23452e-13	21.1152
PAK2	-2.27378	-2.57362	-8.34351	5.4958e-14	5.26712e-13	21.1086
C22orf32	-0.748083	0.269942	-8.34307	5.50933e-14	5.27754e-13	21.1062
SMR3A	0.744861	-3.08736	8.34297	5.51267e-14	5.2782e-13	21.1056
LOC285300	0.971475	-3.74553	8.33887	5.64282e-14	5.39242e-13	21.0825
ISLR2	0.635097	1.85698	8.33551	5.75174e-14	5.49123e-13	21.0637
BCL2L10	0.61814	-2.1952	8.33499	5.76874e-14	5.50481e-13	21.0608
TWF1	-0.771986	0.409158	-8.3348	5.77507e-14	5.50821e-13	21.0597
RHOH	-0.643395	0.521681	-8.33349	5.81822e-14	5.5467e-13	21.0523
OR10A6	0.709609	-1.94432	8.33207	5.86535e-14	5.58628e-13	21.0444
XLOC_013631	-1.01465	-4.0032	-8.33168	5.87839e-14	5.59333e-13	21.0422
ICMT	-0.635373	-2.69362	-8.32468	6.11725e-14	5.81782e-13	21.0029
GNA15	0.741617	4.04972	8.32234	6.19906e-14	5.88999e-13	20.9898
PCDH10	0.658287	-1.43747	8.32202	6.21055e-14	5.8981e-13	20.9879
C10orf88	-1.03061	-2.81671	-8.32026	6.27306e-14	5.95177e-13	20.9781
RORB	-1.34253	-1.25619	-8.31009	6.64641e-14	6.29398e-13	20.921
LIM2	0.737853	-0.885288	8.30887	6.69274e-14	6.33484e-13	20.9142
TFDP2	-0.719911	-1.47245	-8.30272	6.93083e-14	6.54773e-13	20.8797
TSPAN9	1.34288	0.267647	8.29958	7.05567e-14	6.66249e-13	20.8621
MRPL30	-0.656636	-1.893	-8.29916	7.07246e-14	6.67518e-13	20.8597
HIGD1A	-0.585159	-1.6339	-8.29832	7.10634e-14	6.7008e-13	20.855
HVCN1	0.600256	2.89309	8.29647	7.18132e-14	6.76507e-13	20.8447
PION	-0.601347	1.38123	-8.29155	7.38469e-14	6.9432e-13	20.8171
TRIM32	-0.752603	-1.45485	-8.29148	7.38787e-14	6.9432e-13	20.8167
ZBTB1	-1.00087	-1.26577	-8.28983	7.45744e-14	7.00527e-13	20.8074
IPO5	-0.654227	-1.88904	-8.2857	7.63442e-14	7.16017e-13	20.7843
C11orf75	0.731129	1.16822	8.28535	7.64943e-14	7.16868e-13	20.7824
GPX3	-0.594188	1.53331	-8.28391	7.71231e-14	7.2242e-13	20.7743
ZFAND1	-0.664563	0.953922	-8.28259	7.77033e-14	7.26828e-13	20.7669
CAPZA3	1.03857	-3.7045	8.27964	7.90143e-14	7.38743e-13	20.7504
ZNF518A	-0.744033	-1.19667	-8.27936	7.91419e-14	7.39588e-13	20.7488
C1orf227	-0.615901	-3.98058	-8.27893	7.93353e-14	7.41047e-13	20.7464
ERCC5	-0.960024	1.97915	-8.27132	8.28393e-14	7.71963e-13	20.7038
ACAD8	-0.70386	-1.59488	-8.2645	8.61055e-14	8.00898e-13	20.6656
SLBP	-0.671956	-0.808568	-8.26434	8.61853e-14	8.01266e-13	20.6647
CHAF1B	-1.06833	-1.8699	-8.26369	8.65058e-14	8.03869e-13	20.661
DUSP12	-0.655693	-0.175587	-8.26312	8.6782e-14	8.06059e-13	20.6579
NUDCD2	-0.648484	-1.42796	-8.25631	9.02028e-14	8.36659e-13	20.6197
MORF4L2	-0.83937	0.642161	-8.25557	9.05813e-14	8.39778e-13	20.6156
TANC2	-0.760781	-2.55111	-8.25021	9.33791e-14	8.6491e-13	20.5856
NCALD	-0.718883	-1.1656	-8.24793	9.45919e-14	8.7492e-13	20.5729
OCR1	-0.886958	1.05367	-8.24698	9.51056e-14	8.79262e-13	20.5675
ADH5	-0.812959	-1.97737	-8.2463	9.54721e-14	8.81831e-13	20.5637
ZNF429	-0.714894	6.54113	-8.24155	9.80779e-14	9.04638e-13	20.5372
CUL3	-0.886349	-0.388565	-8.23918	9.94056e-14	9.16459e-13	20.5239
XLOC_009862	0.851193	-3.02188	8.23901	9.95027e-14	9.16929e-13	20.5229
CKS2	-0.757852	-3.97282	-8.23096	1.04145e-13	9.58373e-13	20.478
PLA2G5	0.707576	-4.24044	8.23052	1.04408e-13	9.60354e-13	20.4755
SLC30A4	-0.864943	-3.42889	-8.22712	1.06435e-13	9.77642e-13	20.4565
ZNF366	0.740231	-3.45185	8.22652	1.068e-13	9.80536e-13	20.4531
PRR20B	-1.34299	-0.0354389	-8.22375	1.08488e-13	9.95113e-13	20.4377
ZBTB3	0.606822	-1.42548	8.22322	1.08813e-13	9.97639e-13	20.4347
SDIM1	0.945107	-3.03515	8.21797	1.12103e-13	1.02543e-12	20.4053
PPP1R16B	-0.692169	0.617738	-8.2143	1.14453e-13	1.04645e-12	20.3849
C21orf2	-0.603396	-0.501594	-8.21417	1.1454e-13	1.04677e-12	20.3841
OTOP2	0.71401	-2.51305	8.21234	1.15733e-13	1.05718e-12	20.3739
XLOC_007995	0.649549	-0.384622	8.20995	1.17311e-13	1.07061e-12	20.3606
LOC100289094	0.79641	-3.07679	8.20911	1.17868e-13	1.0752e-12	20.3559
KAT7	-0.836628	2.422	-8.2088	1.18073e-13	1.07658e-12	20.3542
RABEPK	-0.656528	1.28883	-8.20507	1.20595e-13	1.09907e-12	20.3333
MAGED4B	0.607654	0.125837	8.20449	1.20989e-13	1.10216e-12	20.3301
NOTCH2	-0.590978	2.03664	-8.1956	1.27234e-13	1.15428e-12	20.2805
PDXDC1	-0.687035	-0.769338	-8.19473	1.27861e-13	1.15944e-12	20.2756
GNG13	0.751917	0.523525	8.19342	1.28813e-13	1.16754e-12	20.2683
CASC4	-0.612337	-0.0738308	-8.19155	1.30185e-13	1.1789e-12	20.2578
MAP7D3	-0.610808	-2.90617	-8.19056	1.30916e-13	1.18444e-12	20.2523
TEF	0.621529	0.146493	8.19019	1.31192e-13	1.1864e-12	20.2502
C2orf62	0.611701	-1.11901	8.18749	1.33208e-13	1.20353e-12	20.2352
EAF1	-0.690058	0.767791	-8.18702	1.33564e-13	1.20621e-12	20.2326
F2RL3	0.712951	3.47783	8.18509	1.35033e-13	1.21891e-12	20.2218
PKDREJ	0.652398	-2.2956	8.18414	1.35758e-13	1.2249e-12	20.2165
OXER1	0.591592	-0.168079	8.18282	1.36777e-13	1.23354e-12	20.2091
LIN7A	0.95168	2.80584	8.1788	1.39918e-13	1.2613e-12	20.1867
IFRD1	-0.831921	-0.778208	-8.1732	1.44421e-13	1.30011e-12	20.1555
C8orf33	-0.970189	-3.49114	-8.17087	1.46336e-13	1.31676e-12	20.1425
ZNF26	-1.07308	-2.20604	-8.16759	1.49075e-13	1.33777e-12	20.1242
ST6GALNAC5	0.882242	-2.93386	8.16502	1.51262e-13	1.35678e-12	20.1099
PRRT2	0.634376	0.677187	8.16044	1.55223e-13	1.38833e-12	20.0844
NRXN2	0.857398	-2.35938	8.16039	1.55268e-13	1.38833e-12	20.0841
FCN3	0.932842	-3.4984	8.15646	1.58753e-13	1.41821e-12	20.0622
KLB	-1.01086	-4.16397	-8.15087	1.63847e-13	1.46176e-12	20.031
DNAJB1	-0.725733	0.445672	-8.14554	1.68858e-13	1.50376e-12	20.0013
LOC100506549	0.873104	-1.40544	8.14488	1.69484e-13	1.50817e-12	19.9977
MRPL42	-0.779486	-0.628033	-8.14062	1.73615e-13	1.54267e-12	19.9739
SLC38A2	-0.748444	1.42559	-8.13462	1.79598e-13	1.59369e-12	19.9405
XLOC_l2_012871	0.621255	-1.41422	8.12923	1.85143e-13	1.63997e-12	19.9105
HRASLS5	-1.22673	5.9741	-8.12904	1.85344e-13	1.64102e-12	19.9095
STXBP5	-1.22958	-2.01609	-8.12501	1.89601e-13	1.67721e-12	19.8871
BFSP1	-1.1497	-3.66428	-8.12478	1.89853e-13	1.67869e-12	19.8858
BCOR	-0.75613	-1.61945	-8.12386	1.90837e-13	1.68664e-12	19.8807
OR4F15	0.793676	-3.12043	8.12096	1.93986e-13	1.71219e-12	19.8645
DLG5	-1.15156	-3.43938	-8.11943	1.95663e-13	1.72623e-12	19.856
PC	0.705744	-2.42752	8.11893	1.96218e-13	1.73035e-12	19.8532
TTBK1	0.832877	-1.97033	8.118	1.97255e-13	1.73873e-12	19.848
MED21	-0.928061	-1.2469	-8.11218	2.03834e-13	1.79275e-12	19.8157
ZNF236	-0.999013	-3.11632	-8.10947	2.06975e-13	1.81715e-12	19.8006
XLOC_007502	0.589955	0.720647	8.10861	2.07977e-13	1.82514e-12	19.7959
CHURC1	-0.84513	-0.999951	-8.10774	2.08999e-13	1.83331e-12	19.791
KLHDC2	-1.03799	-0.510094	-8.10721	2.09628e-13	1.8372e-12	19.7881
XLOC_006978	0.692988	-2.45644	8.10486	2.12423e-13	1.86026e-12	19.775
B3GNT2	-0.862072	-2.14844	-8.10184	2.1607e-13	1.88949e-12	19.7582
CDC42SE2	-1.09278	2.87553	-8.09882	2.19784e-13	1.92113e-12	19.7414
OR4D1	0.763013	-1.75731	8.09788	2.20945e-13	1.93043e-12	19.7362
FBXO41	-0.768415	-1.9646	-8.09417	2.25621e-13	1.96955e-12	19.7156
SYCE3	0.585698	-1.93865	8.09362	2.26311e-13	1.97471e-12	19.7126
SFR1	-1.01469	-0.0658392	-8.0921	2.28268e-13	1.99003e-12	19.7041
SFTPD	0.654121	-2.53205	8.091	2.29682e-13	2.00149e-12	19.698
BRMS1	-0.659934	-2.60779	-8.08974	2.3132e-13	2.01488e-12	19.691
RNF187	-0.724043	-0.736683	-8.08658	2.35474e-13	2.04837e-12	19.6734
LOC100507145	0.967964	-3.77631	8.08552	2.36888e-13	2.05977e-12	19.6675
CSTF2T	-1.09796	-1.79518	-8.08427	2.38563e-13	2.07342e-12	19.6606
NARS2	-0.895788	-1.26125	-8.07632	2.49483e-13	2.16171e-12	19.6164
KIR3DL1	-1.12539	2.03474	-8.07491	2.51466e-13	2.17795e-12	19.6086
OR2T6	0.743342	-4.11702	8.07476	2.51681e-13	2.17886e-12	19.6078
SLC38A8	0.873137	-3.61129	8.07311	2.54025e-13	2.1982e-12	19.5987
CAMK2N1	-0.867363	2.97803	-8.06128	2.71516e-13	2.34242e-12	19.533
CTDSP2	-0.654909	0.615309	-8.05957	2.74145e-13	2.36407e-12	19.5235
STOML3	0.62528	-2.42138	8.05542	2.80622e-13	2.41783e-12	19.5005
MTMR8	-0.616479	-1.46331	-8.0523	2.85589e-13	2.45956e-12	19.4832
PPID	-0.811952	-1.29855	-8.05219	2.85777e-13	2.46011e-12	19.4825
RAPGEFL1	-1.15317	-3.99448	-8.05014	2.89081e-13	2.4864e-12	19.4712
GPER	0.774024	-1.69834	8.0482	2.92252e-13	2.51041e-12	19.4604
ZFYVE20	-0.751043	-2.47861	-8.04564	2.9649e-13	2.54242e-12	19.4463
PAPSS2	-1.15201	-3.59759	-8.04301	3.00908e-13	2.57919e-12	19.4317
MAP7	-0.687	-1.84496	-8.03247	3.19283e-13	2.72846e-12	19.3732
MAP4K3	-0.916196	-3.26062	-8.03098	3.21972e-13	2.75025e-12	19.365
CD300A	-1.63603	-0.495025	-8.02861	3.26283e-13	2.78396e-12	19.3519
SETMAR	-0.635955	3.44861	-8.02858	3.26339e-13	2.78396e-12	19.3517
PHLPP2	-0.736795	-1.87154	-8.02239	3.37879e-13	2.87994e-12	19.3174
TBC1D23	-1.36816	-1.66787	-8.0214	3.39763e-13	2.89475e-12	19.3119
MAGED1	-0.617302	-1.06459	-8.01988	3.42691e-13	2.91596e-12	19.3035
C6orf204	-0.716759	-0.833641	-8.01522	3.51779e-13	2.98945e-12	19.2777
KCNK15	0.623832	-2.40682	8.01406	3.54062e-13	3.00628e-12	19.2713
XLOC_013052	0.756761	-3.98702	8.00939	3.63469e-13	3.08352e-12	19.2455
TSPAN31	-0.917161	-2.34819	-8.00798	3.66357e-13	3.10669e-12	19.2377
ST8SIA6	-0.732697	1.17671	-8.00744	3.67469e-13	3.11479e-12	19.2347
SAR1A	-0.611863	2.39571	-7.99943	3.84388e-13	3.24574e-12	19.1903
TRMT12	-0.784472	-2.17398	-7.99878	3.85779e-13	3.25611e-12	19.1867
KIAA1598	0.659291	-0.160184	7.99805	3.87359e-13	3.26805e-12	19.1827
DLEU7	-1.61476	-2.70371	-7.99609	3.91649e-13	3.30285e-12	19.1719
PDGFA	0.764737	-0.45637	7.9918	4.01183e-13	3.38038e-12	19.1481
TREH	1.4333	-3.32827	7.99042	4.04312e-13	3.4053e-12	19.1405
ZNF676	0.751035	0.498055	7.98989	4.05517e-13	3.41401e-12	19.1376
COMMD10	-0.914307	-1.50719	-7.98549	4.15643e-13	3.49629e-12	19.1132
C1orf50	-0.640067	-0.494157	-7.98528	4.16132e-13	3.49893e-12	19.1121
PDZK1IP1	0.941602	1.15271	7.97973	4.29289e-13	3.60498e-12	19.0814
ZNF566	-0.967604	-3.0428	-7.97833	4.32684e-13	3.63195e-12	19.0736
PDCD2L	-0.798097	-4.08739	-7.97606	4.38216e-13	3.67374e-12	19.0611
XLOC_l2_015342	0.757174	-1.81655	7.97534	4.39993e-13	3.68707e-12	19.0571
ZNF615	-0.589471	-1.61237	-7.97193	4.48481e-13	3.75345e-12	19.0383
TFDP3	-1.31044	-0.917891	-7.96739	4.60041e-13	3.84535e-12	19.0132
PLXNA1	-0.773739	-2.3577	-7.9606	4.77874e-13	3.98937e-12	18.9757
FXYD6	0.814339	0.416789	7.9601	4.79222e-13	3.99779e-12	18.973
BMPR2	-0.779561	-0.33125	-7.95339	4.97563e-13	4.13983e-12	18.9359
NUAK1	-1.15777	-3.38869	-7.95135	5.03297e-13	4.18054e-12	18.9246
ATAD2	-0.677829	-1.74237	-7.94826	5.12076e-13	4.24991e-12	18.9076
GINS2	0.614932	0.137899	7.94346	5.26023e-13	4.36202e-12	18.8811
CNTF	-0.746754	-2.16199	-7.94275	5.28108e-13	4.37748e-12	18.8772
CTAG1A	0.686546	-0.336645	7.94219	5.29784e-13	4.38954e-12	18.8741
RNASE11	0.897899	-3.94896	7.93573	5.49281e-13	4.54351e-12	18.8385
TBX10	0.623993	-1.477	7.93358	5.55916e-13	4.59457e-12	18.8266
HIST1H1A	0.900358	1.07802	7.92813	5.73131e-13	4.72899e-12	18.7966
IGFBP3	-1.28621	-2.36094	-7.92526	5.82425e-13	4.79969e-12	18.7807
LDOC1	-0.845138	-1.69398	-7.92489	5.8362e-13	4.80755e-12	18.7787
TM6SF2	0.959298	-3.05395	7.92049	5.98174e-13	4.92539e-12	18.7544
IMPA2	0.672848	-0.176207	7.90624	6.4777e-13	5.31396e-12	18.6759
CDC37L1	-0.746749	-1.8039	-7.89961	6.72202e-13	5.50757e-12	18.6395
JAKMIP1	-0.916771	0.689488	-7.89797	6.78408e-13	5.55612e-12	18.6304
GORAB	-0.648371	-2.02303	-7.89764	6.79634e-13	5.56388e-12	18.6286
CCDC126	-0.775045	-2.48181	-7.89271	6.98627e-13	5.7123e-12	18.6015
LOC100287718	0.598995	-0.527216	7.88832	7.15956e-13	5.84198e-12	18.5773
PODN	-1.45336	-2.93431	-7.88773	7.18335e-13	5.85899e-12	18.5741
ALDOAP2	0.895256	-2.19987	7.88465	7.30769e-13	5.95552e-12	18.5571
C18orf1	-0.597751	-2.71613	-7.88072	7.47002e-13	6.08033e-12	18.5355
NWD1	0.706372	0.22664	7.87543	7.6936e-13	6.25719e-12	18.5064
OR2D2	0.764938	-3.01422	7.87533	7.69829e-13	6.25844e-12	18.5058
RNF4	-0.753493	0.286361	-7.87414	7.74954e-13	6.29753e-12	18.4993
NR3C2	-0.735123	-1.73507	-7.87027	7.91877e-13	6.42979e-12	18.478
CCR2	0.887611	1.29135	7.86224	8.28148e-13	6.71334e-12	18.4339
KCND2	0.705494	-2.03503	7.86105	8.33643e-13	6.74687e-12	18.4274
GCM1	0.792689	-3.54383	7.85671	8.54082e-13	6.89545e-12	18.4035
YSK4	-0.713271	-4.39486	-7.8562	8.56483e-13	6.91203e-12	18.4007
XLOC_012564	0.765842	-4.51266	7.85403	8.66933e-13	6.98784e-12	18.3888
DENND4A	-0.65631	-0.178112	-7.85137	8.79883e-13	7.08648e-12	18.3742
C1QTNF4	0.738663	-2.27458	7.85055	8.83901e-13	7.11596e-12	18.3697
STAC2	0.875573	-2.16471	7.84787	8.97228e-13	7.22032e-12	18.3549
RC3H1	-0.646029	1.77827	-7.84758	8.98666e-13	7.22605e-12	18.3534
LOC100130865	-1.90259	-2.37407	-7.8465	9.04083e-13	7.26373e-12	18.3474
TMEM239	0.585869	-1.31644	7.84366	9.18514e-13	7.37073e-12	18.3318
TMEM199	-0.838688	-1.8121	-7.84351	9.19299e-13	7.37406e-12	18.331
POU2F2	0.606674	-0.33129	7.83946	9.4023e-13	7.52676e-12	18.3088
NFU1	-0.75275	-2.51198	-7.83018	9.90121e-13	7.91341e-12	18.2579
DHRS13	-0.735512	-2.67245	-7.82969	9.92862e-13	7.93212e-12	18.2552
ODF3L2	0.879441	-1.06007	7.82573	1.01499e-12	8.1024e-12	18.2334
CRH	0.814513	-4.28543	7.82298	1.03065e-12	8.21885e-12	18.2184
XLOC_l2_010897	0.97656	-0.401024	7.81962	1.0501e-12	8.36583e-12	18.1999
TGM3	0.748674	-2.58294	7.81858	1.05617e-12	8.40749e-12	18.1943
C20orf111	-0.687685	0.365876	-7.81534	1.07539e-12	8.55364e-12	18.1765
XLOC_013475	0.884698	0.24377	7.81356	1.08611e-12	8.62167e-12	18.1667
TOMM70A	-0.601053	-1.04818	-7.81064	1.10393e-12	8.75608e-12	18.1507
XLOC_l2_015260	0.740542	-2.30389	7.80807	1.11982e-12	8.87859e-12	18.1366
DNAJC8	-1.23611	-3.68542	-7.80608	1.13227e-12	8.96966e-12	18.1257
D4S234E	-0.781443	-1.18646	-7.80443	1.14269e-12	9.0419e-12	18.1167
OR5H1	1.08842	-3.56018	7.80069	1.16671e-12	9.22829e-12	18.0962
SUV39H1	-0.621266	-1.42772	-7.80016	1.17015e-12	9.25182e-12	18.0933
SLC1A5	0.611543	1.03084	7.79957	1.17401e-12	9.27863e-12	18.0901
ZNF25	-0.630091	-2.17068	-7.79407	1.21047e-12	9.5592e-12	18.0599
UAP1	-0.585348	0.716101	-7.79211	1.22371e-12	9.64944e-12	18.0492
PLEKHH3	0.633509	-1.03665	7.79202	1.22432e-12	9.64944e-12	18.0487
XLOC_007602	0.651351	0.851014	7.79024	1.23654e-12	9.74185e-12	18.0389
HIAT1	-0.645037	-0.621839	-7.78961	1.24086e-12	9.77201e-12	18.0355
XLOC_002487	-0.877762	-3.79336	-7.78944	1.24204e-12	9.77748e-12	18.0346
LRRC42	-0.586534	-0.225722	-7.7868	1.26035e-12	9.91764e-12	18.0202
COX19	-0.731103	-1.49945	-7.78624	1.26432e-12	9.94492e-12	18.0171
CACNA2D2	-0.797814	0.0930619	-7.78504	1.27273e-12	1.00071e-11	18.0105
TRIM2	0.747798	-1.72177	7.78232	1.29213e-12	1.01516e-11	17.9956
XLOC_l2_000649	-0.924776	-3.10924	-7.77656	1.33416e-12	1.04612e-11	17.9641
PRKD1	0.65537	-1.93424	7.7688	1.39292e-12	1.0909e-11	17.9216
C11orf52	0.698656	-2.69034	7.7677	1.40141e-12	1.09712e-11	17.9157
FANK1	0.716323	-2.70222	7.76254	1.44219e-12	1.12638e-11	17.8874
LRRN4	0.727116	-4.04138	7.75498	1.50392e-12	1.17229e-11	17.8461
DEFB134	0.809511	-3.4313	7.7522	1.52736e-12	1.18917e-11	17.8309
DLD	-0.67284	-2.61933	-7.75043	1.54237e-12	1.19991e-11	17.8213
XLOC_004050	0.790434	-3.09414	7.75036	1.54299e-12	1.19992e-11	17.8209
CRBN	-1.07435	2.58772	-7.7481	1.56244e-12	1.21458e-11	17.8085
MCPH1	-0.739889	-2.45889	-7.74047	1.63001e-12	1.26512e-11	17.7668
MS4A4A	0.716809	2.28012	7.73956	1.63822e-12	1.271e-11	17.7619
XLOC_l2_000217	0.875147	-1.93525	7.73926	1.64098e-12	1.27214e-11	17.7602
GTF2H3	-0.868373	-0.624028	-7.73704	1.6613e-12	1.28639e-11	17.7481
CHI3L2	-1.09354	-3.40158	-7.73352	1.69406e-12	1.30971e-11	17.7289
XLOC_011801	0.875454	-2.94384	7.73161	1.71208e-12	1.32262e-11	17.7184
CLEC12B	0.639341	-0.410016	7.73139	1.71418e-12	1.32373e-11	17.7172
ZDHHC6	-1.20043	-1.0446	-7.72918	1.73529e-12	1.33907e-11	17.7052
TRIM66	-0.90753	-4.16063	-7.72901	1.73696e-12	1.33976e-11	17.7042
KRTAP13-1	0.816518	-3.0825	7.72602	1.76594e-12	1.36158e-11	17.6879
FOXO1	-0.601328	1.43871	-7.72148	1.81088e-12	1.39383e-11	17.6632
ACTG2	0.809929	-2.86738	7.72144	1.81127e-12	1.39383e-11	17.663
XLOC_001704	0.669394	-1.17606	7.71929	1.83299e-12	1.41e-11	17.6512
LOC283713	-1.11952	-3.54973	-7.71416	1.88588e-12	1.449e-11	17.6232
ZNF259P1	-0.859378	-1.37719	-7.71339	1.89389e-12	1.454e-11	17.6191
RPP38	-0.731814	1.17487	-7.70887	1.94187e-12	1.48914e-11	17.5944
C12orf61	-1.07624	-2.68405	-7.70799	1.95133e-12	1.49467e-11	17.5896
SLA	-0.754396	1.02219	-7.70722	1.95975e-12	1.50054e-11	17.5854
PADI3	0.806374	-3.50117	7.70645	1.96808e-12	1.50575e-11	17.5812
LYZL2	0.681793	-0.990268	7.69882	2.053e-12	1.56515e-11	17.5396
ECT2	0.684955	-3.19801	7.69308	2.11927e-12	1.61274e-11	17.5083
DBR1	-0.92654	-2.67784	-7.69112	2.14237e-12	1.62907e-11	17.4977
LYRM7	-0.751588	-2.09091	-7.68978	2.15827e-12	1.64053e-11	17.4904
SLC17A7	0.726012	-2.98912	7.68835	2.17544e-12	1.65295e-11	17.4826
KIR2DS2	-1.09351	1.79874	-7.68715	2.18986e-12	1.66327e-11	17.4761
TRMT11	-0.61268	0.203272	-7.6815	2.25933e-12	1.71211e-11	17.4453
ELMOD2	-0.830986	-2.45564	-7.68126	2.26232e-12	1.71373e-11	17.444
XLOC_011672	0.611223	-0.726523	7.67557	2.33461e-12	1.76579e-11	17.413
RNASE2	0.989222	3.51497	7.67404	2.35443e-12	1.78011e-11	17.4047
TNFSF9	-1.16809	-1.8524	-7.67153	2.3874e-12	1.80335e-11	17.391
ENO4	0.683192	-1.78525	7.66647	2.45512e-12	1.8499e-11	17.3635
CDK8	-0.613643	-2.09627	-7.66044	2.53824e-12	1.90891e-11	17.3307
CHMP1B	-1.09881	-3.03208	-7.65769	2.57707e-12	1.9357e-11	17.3158
NAP1L2	-0.913661	-3.44827	-7.65764	2.57776e-12	1.9357e-11	17.3155
PDE6H	-1.45398	-3.07316	-7.65169	2.66377e-12	1.99878e-11	17.2832
NKIRAS1	-0.992506	-2.09332	-7.65002	2.68853e-12	2.0166e-11	17.2741
NXNL1	0.747944	-3.22322	7.64877	2.70713e-12	2.02902e-11	17.2673
TEAD2	0.84594	-1.13424	7.64672	2.73794e-12	2.04979e-11	17.2561
RRN3	-1.15605	-2.88761	-7.64227	2.80592e-12	2.09911e-11	17.232
TMEM144	1.26496	-2.3145	7.64142	2.81924e-12	2.10828e-11	17.2273
LOC100287437	-0.830362	-4.4263	-7.63903	2.85658e-12	2.13459e-11	17.2144
POMT1	-0.801081	-2.22355	-7.63845	2.86581e-12	2.14069e-11	17.2112
LOC100133145	0.790594	-2.6796	7.63488	2.92279e-12	2.18161e-11	17.1918
ZBTB41	-0.763903	-3.8465	-7.63452	2.92859e-12	2.18446e-11	17.1899
RHOBTB3	-0.867577	-1.65757	-7.62692	3.05382e-12	2.27259e-11	17.1486
PET117	-0.930199	-1.86498	-7.6264	3.0627e-12	2.27834e-11	17.1458
NUDT15	-0.875944	-2.33531	-7.62341	3.11363e-12	2.31536e-11	17.1295
HIRA	-1.04214	-1.7905	-7.61909	3.1885e-12	2.36838e-11	17.1061
LRRC30	0.82068	-2.75706	7.61229	3.31039e-12	2.45159e-11	17.0692
XLOC_009417	0.870334	-3.27607	7.6108	3.33768e-12	2.47088e-11	17.0611
HMGXB4	-0.633544	0.259857	-7.61034	3.34608e-12	2.47525e-11	17.0587
SLC30A5	-0.586588	0.332907	-7.60982	3.35561e-12	2.48138e-11	17.0559
XLOC_009509	0.614386	-2.92229	7.60658	3.41619e-12	2.52242e-11	17.0382
FGF8	0.79065	-2.9213	7.60555	3.43559e-12	2.53487e-11	17.0327
ERRFI1	-0.898931	-3.83786	-7.60472	3.4512e-12	2.54544e-11	17.0282
ASB2	-0.817503	-3.57691	-7.60197	3.50399e-12	2.58246e-11	17.0133
RYR3	-0.85163	-4.30758	-7.60184	3.50644e-12	2.5833e-11	17.0126
LPPR3	0.846335	-0.207809	7.60065	3.52951e-12	2.59933e-11	17.0061
TIGIT	-0.681725	-0.387968	-7.59563	3.62844e-12	2.66824e-11	16.9789
GPR17	0.608723	-1.89736	7.58986	3.74546e-12	2.74819e-11	16.9477
XLOC_003912	-0.944442	-3.34428	-7.58748	3.79475e-12	2.7823e-11	16.9348
PPIE	-0.597072	-0.282009	-7.58714	3.80186e-12	2.78649e-11	16.933
XLOC_001151	0.674749	-3.31534	7.58637	3.81799e-12	2.79728e-11	16.9288
C2orf71	0.587188	-0.412119	7.58563	3.83368e-12	2.8067e-11	16.9247
XLOC_006079	-1.18507	-3.51669	-7.58018	3.95033e-12	2.88785e-11	16.8952
RHOV	0.812111	-3.61422	7.58001	3.9541e-12	2.88955e-11	16.8943
SENP5	-0.742817	2.17188	-7.57987	3.95704e-12	2.89063e-11	16.8936
GNAT2	-0.951625	-3.81009	-7.57726	4.0142e-12	2.93023e-11	16.8795
XLOC_013945	0.710499	-4.22137	7.5686	4.21001e-12	3.06754e-11	16.8326
RWDD2B	-0.657764	0.304526	-7.56812	4.22112e-12	3.0745e-11	16.83
NDFIP2	-1.02568	-2.022	-7.56748	4.23607e-12	3.08426e-11	16.8265
OR10R3P	0.641463	-3.24061	7.56681	4.25175e-12	3.09342e-11	16.8229
LOC100653120	-1.13307	-0.677001	-7.56327	4.33523e-12	3.15184e-11	16.8037
KLHL15	-0.742646	0.911331	-7.56241	4.35581e-12	3.16564e-11	16.7991
DHDH	0.897502	-2.54337	7.56135	4.3812e-12	3.18178e-11	16.7933
TRIM13	0.585458	0.0765826	7.56111	4.38704e-12	3.18485e-11	16.792
ACTR6	-0.809058	-1.78128	-7.561	4.38963e-12	3.18556e-11	16.7915
GPR123	0.712919	-4.1293	7.5601	4.41126e-12	3.19893e-11	16.7866
XLOC_003444	0.720622	-3.29146	7.55843	4.4521e-12	3.22619e-11	16.7775
AKTIP	-0.618029	0.761855	-7.55475	4.54279e-12	3.29071e-11	16.7577
XLOC_009948	0.679732	-2.11371	7.55206	4.61057e-12	3.33616e-11	16.7431
WFIKKN1	0.754297	-3.84886	7.54947	4.67647e-12	3.38261e-11	16.7292
MUC3	0.786306	-2.82878	7.54632	4.75825e-12	3.44051e-11	16.7121
XLOC_007586	0.789561	-3.39528	7.5457	4.77437e-12	3.45091e-11	16.7088
NPSA	-0.894448	-3.001	-7.53995	4.92759e-12	3.55778e-11	16.6777
SLC4A1	0.712234	-1.10354	7.53692	5.01017e-12	3.61478e-11	16.6613
XLOC_l2_010011	-0.69792	-3.44653	-7.53654	5.02068e-12	3.62105e-11	16.6593
SPIRE2	-0.882527	-4.21078	-7.53429	5.08287e-12	3.66457e-11	16.6471
GOLGA6C	-0.751941	0.626972	-7.52987	5.20766e-12	3.7491e-11	16.6233
DHX40	-0.764883	-1.75098	-7.52487	5.35255e-12	3.85201e-11	16.5963
RBBP9	-0.821213	2.34491	-7.524	5.37819e-12	3.86767e-11	16.5916
NDUFB2	-0.787322	0.967702	-7.52285	5.41199e-12	3.88916e-11	16.5854
ZNF430	-1.1394	4.06397	-7.52143	5.45442e-12	3.91824e-11	16.5777
C16orf82	0.616077	1.31863	7.52125	5.45971e-12	3.92044e-11	16.5768
SV2B	0.603654	-0.201785	7.52119	5.46144e-12	3.92044e-11	16.5764
ELMO2	-0.640437	0.88134	-7.52076	5.47449e-12	3.92839e-11	16.5741
PCDHA13	0.599054	-0.899984	7.51811	5.55464e-12	3.98303e-11	16.5598
ZNF613	-0.875638	-3.99905	-7.50851	5.85459e-12	4.18603e-11	16.508
PRODH2	0.724772	-2.71756	7.50764	5.88251e-12	4.20448e-11	16.5034
LOC100506765	0.636023	-0.174644	7.50639	5.92289e-12	4.2303e-11	16.4966
TUBGCP5	-0.779335	-1.23723	-7.50354	6.0161e-12	4.29071e-11	16.4813
ZFYVE16	-0.737544	-2.48812	-7.50265	6.04572e-12	4.31029e-11	16.4764
PPP4R1	-1.02994	-1.68346	-7.49851	6.18421e-12	4.40428e-11	16.4541
MAP1LC3C	0.67586	-4.1611	7.49786	6.2062e-12	4.41836e-11	16.4506
XLOC_l2_013808	-0.64459	2.45083	-7.4958	6.2767e-12	4.46376e-11	16.4395
GNL2	-0.884774	1.88559	-7.49556	6.28512e-12	4.46814e-11	16.4382
SRD5A1	0.610608	0.48901	7.49513	6.29966e-12	4.47528e-11	16.4359
MPHOSPH6	-1.10169	-2.46548	-7.48943	6.49955e-12	4.61563e-11	16.4052
SESN2	-0.612851	-0.396583	-7.48602	6.62181e-12	4.69909e-11	16.3869
DNAJC28	-0.983785	-4.15935	-7.48546	6.64236e-12	4.71031e-11	16.3838
LOC100505750	-0.811197	-0.393943	-7.48318	6.72569e-12	4.76431e-11	16.3715
IGFL3	0.640818	-0.210952	7.48104	6.8047e-12	4.81685e-11	16.3601
SHISA3	-1.0213	-3.91082	-7.47848	6.90069e-12	4.87958e-11	16.3463
NUP205	-0.687057	-0.131128	-7.47203	7.14875e-12	5.04781e-11	16.3115
GPA33	-1.01755	-2.46877	-7.46769	7.32012e-12	5.15965e-11	16.2882
human	-1.00472	-4.43815	-7.46503	7.42732e-12	5.22779e-11	16.2739
ZNF395	-0.709319	0.0691069	-7.46442	7.45244e-12	5.24362e-11	16.2706
HDGFL1	0.681236	-1.87438	7.46206	7.54908e-12	5.30785e-11	16.2579
XLOC_000811	0.634434	-0.609972	7.46149	7.57274e-12	5.32261e-11	16.2548
HBQ1	1.26013	0.693493	7.46132	7.57959e-12	5.32554e-11	16.2539
ZNF180	-0.98361	-3.55425	-7.4608	7.60101e-12	5.33871e-11	16.2512
OR52K2	1.06417	-0.833047	7.46061	7.60925e-12	5.3426e-11	16.2501
AMH	0.603045	-2.51235	7.45741	7.7433e-12	5.42905e-11	16.2329
DHX36	-0.67355	0.836806	-7.45337	7.9161e-12	5.54629e-11	16.2112
PCDHB11	0.858556	-2.45289	7.44125	8.45789e-12	5.91338e-11	16.1461
KCTD12	0.607149	3.54237	7.44005	8.51351e-12	5.94809e-11	16.1396
GABRD	0.663861	-2.43359	7.43535	8.73467e-12	6.09403e-11	16.1144
GATA3	-0.929778	-2.69082	-7.43313	8.84118e-12	6.16186e-11	16.1025
UBR7	-0.679277	-1.84649	-7.43029	8.97922e-12	6.25149e-11	16.0872
TTYH3	0.629602	3.11974	7.42573	9.20519e-12	6.39973e-11	16.0628
NCLN	-0.79081	-1.6299	-7.42371	9.3072e-12	6.45833e-11	16.0519
METTL6	-0.88762	-2.71926	-7.42332	9.32721e-12	6.46884e-11	16.0498
IGSF1	0.627116	-0.468694	7.42277	9.35522e-12	6.486e-11	16.0469
SPNS2	-0.852474	-2.11617	-7.42201	9.39378e-12	6.51047e-11	16.0428
XLOC_004609	-0.713812	-0.326327	-7.41985	9.50523e-12	6.58083e-11	16.0312
LOC100129113	0.672942	-0.339229	7.41815	9.59365e-12	6.6351e-11	16.0221
LILRA6	0.731542	1.69288	7.41648	9.6818e-12	6.69374e-11	16.0131
CCT6B	-0.919817	-2.94194	-7.41559	9.72884e-12	6.72159e-11	16.0084
SLC43A1	-0.851055	-3.95315	-7.41522	9.74828e-12	6.73268e-11	16.0064
RPS6KC1	-0.711038	0.723889	-7.40758	1.0163e-11	7.01545e-11	15.9654
LRRC10	0.669276	-2.58777	7.40355	1.03885e-11	7.16243e-11	15.9438
SNORA12	-1.0828	-2.8182	-7.39479	1.0896e-11	7.49672e-11	15.8969
PROM1	0.815855	-4.2366	7.39007	1.11795e-11	7.67844e-11	15.8716
XLOC_014097	0.680657	2.36305	7.3879	1.13125e-11	7.76714e-11	15.86
SRRD	-0.81566	-2.00291	-7.38762	1.13299e-11	7.77643e-11	15.8585
LONP2	-1.00579	-2.17611	-7.38745	1.13405e-11	7.781e-11	15.8576
POMT2	0.703118	-2.41316	7.38705	1.13647e-11	7.79492e-11	15.8555
OSBPL8	-0.666331	-0.278984	-7.38315	1.1609e-11	7.95423e-11	15.8346
FGFBP2	-0.800809	6.01416	-7.37991	1.18153e-11	8.08428e-11	15.8172
TUBB2A	0.697962	4.06397	7.37544	1.21058e-11	8.26894e-11	15.7934
TMPO	-0.894967	-0.520795	-7.36099	1.30953e-11	8.92032e-11	15.7161
CLDN11	0.739017	-3.30929	7.3597	1.31879e-11	8.98035e-11	15.7091
XBP1	-0.6501	1.88277	-7.35559	1.34856e-11	9.17365e-11	15.6872
FAM126A	-0.670976	-2.14045	-7.35506	1.35242e-11	9.1967e-11	15.6844
DKFZp547J222	0.591721	-1.65632	7.35402	1.3601e-11	9.24263e-11	15.6788
HMGCS1	-0.819479	-2.2349	-7.35026	1.38819e-11	9.42388e-11	15.6587
LOC100287482	-0.66086	-3.5584	-7.3493	1.39542e-11	9.4697e-11	15.6536
MYO3B	-0.690686	-4.46346	-7.34899	1.39777e-11	9.48241e-11	15.6519
LOC100506950	-1.1655	-3.34397	-7.34877	1.39946e-11	9.49064e-11	15.6508
DGKG	0.590668	-0.208327	7.34863	1.40048e-11	9.49431e-11	15.65
HIST1H4G	1.21203	-3.78592	7.34149	1.45584e-11	9.8428e-11	15.6119
XLOC_001098	0.685798	-2.32623	7.34092	1.46034e-11	9.8665e-11	15.6089
CLEC3B	0.794923	-3.78396	7.33891	1.47643e-11	9.97178e-11	15.5981
TNFSF10	0.700118	3.10197	7.33098	1.5413e-11	1.03993e-10	15.5558
LOC221946	-1.0439	-3.84145	-7.32964	1.55252e-11	1.04715e-10	15.5487
XLOC_009416	-1.19038	-3.31063	-7.32105	1.62665e-11	1.09343e-10	15.5028
KMO	0.618476	0.260141	7.31502	1.68062e-11	1.12781e-10	15.4707
WARS2	-0.962724	-3.53686	-7.31403	1.68971e-11	1.13314e-10	15.4654
ZNF680	-0.866166	-3.22466	-7.31264	1.70245e-11	1.1413e-10	15.458
XLOC_008088	-0.857773	-3.62638	-7.31245	1.70423e-11	1.14173e-10	15.457
RNF165	-1.17308	-3.46864	-7.30835	1.74256e-11	1.16504e-10	15.4351
ZNF83	-1.17373	-1.84381	-7.30749	1.75064e-11	1.16966e-10	15.4306
LOC100271722	0.643154	-2.63196	7.30714	1.75399e-11	1.17151e-10	15.4287
XLOC_l2_001440	-0.846229	-4.85723	-7.30453	1.77899e-11	1.18661e-10	15.4148
GPR179	0.682067	-2.17225	7.30387	1.78529e-11	1.19041e-10	15.4113
C20orf85	0.628206	-1.77281	7.30153	1.80808e-11	1.2052e-10	15.3988
MUC5AC	0.713136	-1.60355	7.29709	1.85206e-11	1.23411e-10	15.3752
ZNF649	-0.879815	-4.13173	-7.29665	1.85652e-11	1.23666e-10	15.3729
FRMD5	-0.585736	-4.12223	-7.29334	1.89011e-11	1.25862e-10	15.3552
FLYWCH2	-0.922264	-2.38847	-7.29169	1.90705e-11	1.26862e-10	15.3465
SNORA58	-1.23075	-1.20715	-7.28687	1.95749e-11	1.30043e-10	15.3208
LOC442366	0.698352	-2.98128	7.28501	1.97723e-11	1.31267e-10	15.3109
FASLG	-0.80286	0.116308	-7.27714	2.0633e-11	1.3648e-10	15.269
TGFB1I1	0.669921	-0.173347	7.27332	2.10627e-11	1.3923e-10	15.2488
PLEKHG4	-0.613337	-4.81444	-7.26804	2.1673e-11	1.43216e-10	15.2207
PDCD1	-0.800166	-4.47568	-7.26275	2.23017e-11	1.47273e-10	15.1926
ARRDC3	-1.00419	-1.31776	-7.26112	2.24986e-11	1.48474e-10	15.1839
OR13G1	0.612949	-0.474805	7.26021	2.26102e-11	1.49161e-10	15.1791
ACTRT1	0.770672	-3.99174	7.25997	2.26397e-11	1.49306e-10	15.1778
PRADC1	-0.815767	-3.89347	-7.25268	2.35492e-11	1.5515e-10	15.1391
ZNF250	-0.58512	-1.24781	-7.25055	2.38216e-11	1.56893e-10	15.1278
SRSF12	-0.837392	-4.43673	-7.24547	2.44833e-11	1.61037e-10	15.1008
ZNF251	-0.710633	-1.82681	-7.24114	2.50619e-11	1.64516e-10	15.0779
WWTR1	-0.644129	-3.42683	-7.23996	2.52224e-11	1.65515e-10	15.0716
ESPL1	0.759303	-2.08602	7.23906	2.53453e-11	1.66223e-10	15.0668
LATS1	-0.770427	1.21317	-7.23345	2.6125e-11	1.71099e-10	15.037
ATXN7	-0.793967	2.47524	-7.23323	2.6155e-11	1.71239e-10	15.0359
FAM3C	-0.697386	-1.90243	-7.23116	2.6449e-11	1.72937e-10	15.0249
C7orf74	-0.653238	-1.2444	-7.22876	2.6793e-11	1.74955e-10	15.0122
EID3	-0.962811	-2.20691	-7.22494	2.73519e-11	1.7837e-10	14.9919
XLOC_003693	0.639339	-2.49318	7.22292	2.7651e-11	1.80262e-10	14.9812
ZNF227	-0.77431	-3.13377	-7.22264	2.76923e-11	1.80472e-10	14.9798
OTUD7B	-0.749002	-3.57176	-7.221	2.7939e-11	1.8202e-10	14.971
POMP	-0.662748	-2.49269	-7.21647	2.86296e-11	1.86275e-10	14.947
MTPAP	-0.719404	-0.861007	-7.21587	2.87215e-11	1.86812e-10	14.9439
KRTAP9-7	0.763988	-2.51394	7.21395	2.90206e-11	1.88634e-10	14.9337
XLOC_005010	0.765845	-3.40209	7.21072	2.95304e-11	1.9176e-10	14.9166
RAB2A	-0.970315	2.0969	-7.20842	2.98977e-11	1.94018e-10	14.9044
DPH3	-0.925534	-1.68594	-7.2061	3.02747e-11	1.964e-10	14.8921
CEACAM16	0.689292	-1.46305	7.2043	3.0569e-11	1.9818e-10	14.8826
KAZALD1	0.610178	-4.26134	7.20338	3.07204e-11	1.99096e-10	14.8778
XLOC_006092	0.738748	-3.44101	7.2019	3.09667e-11	2.00627e-10	14.8699
PNMA6A	0.64351	-2.35101	7.19698	3.17983e-11	2.0568e-10	14.8439
SLC30A7	-0.689086	2.47624	-7.18463	3.39832e-11	2.19242e-10	14.7786
LOC100652915	-0.995297	-3.60636	-7.18345	3.41992e-11	2.20564e-10	14.7723
ZFP42	-0.954551	-3.6009	-7.18021	3.48002e-11	2.24222e-10	14.7552
AASS	-0.826869	-2.00487	-7.17943	3.49471e-11	2.25022e-10	14.7511
KCNMB4	0.758589	-0.926549	7.17089	3.65871e-11	2.34822e-10	14.706
CCNB3	-0.732407	0.885735	-7.16996	3.6772e-11	2.35932e-10	14.7011
BEST2	0.715806	-3.86737	7.16819	3.71219e-11	2.37793e-10	14.6918
XLOC_006144	0.600082	-2.96292	7.16331	3.81091e-11	2.43803e-10	14.666
COX18	-1.12578	-3.4448	-7.16308	3.81567e-11	2.44029e-10	14.6647
C17orf58	-0.886611	-4.05542	-7.16068	3.86514e-11	2.46954e-10	14.6521
SIRPB2	0.83787	0.664194	7.15658	3.95123e-11	2.51888e-10	14.6304
SNTB2	-0.756786	0.361395	-7.15499	3.98508e-11	2.53964e-10	14.622
MRPL3	-0.620799	-0.239838	-7.15451	3.99536e-11	2.54537e-10	14.6195
SIRPD	0.591768	1.20658	7.15286	4.03081e-11	2.5655e-10	14.6108
OR51B6	-0.746145	-4.20326	-7.15171	4.05593e-11	2.58065e-10	14.6047
ZNF419	-0.631226	-2.39223	-7.15099	4.07145e-11	2.5897e-10	14.601
NUP54	-0.814942	-1.80479	-7.1508	4.07576e-11	2.59162e-10	14.5999
DHRS2	0.587688	1.83149	7.14971	4.09968e-11	2.60433e-10	14.5942
C7orf52	0.933867	-2.72492	7.14866	4.12275e-11	2.61814e-10	14.5887
SH2D4A	-1.7084	-1.1293	-7.1473	4.15293e-11	2.63647e-10	14.5815
XLOC_001062	-0.628839	-4.38016	-7.14617	4.17833e-11	2.65175e-10	14.5755
SPATA5L1	-0.616128	-1.81188	-7.14559	4.19135e-11	2.65916e-10	14.5725
MNDA	0.647719	4.31426	7.14549	4.19344e-11	2.65964e-10	14.572
CENPC1	-0.587197	2.10323	-7.14302	4.24949e-11	2.69261e-10	14.5589
XLOC_011521	0.820406	-3.64738	7.14263	4.25825e-11	2.6973e-10	14.5569
RECQL	-0.919391	-0.858249	-7.14111	4.29331e-11	2.71691e-10	14.5488
PLAC4	0.899514	-1.24236	7.14054	4.30635e-11	2.7243e-10	14.5459
SLC22A12	0.615099	-1.12956	7.13693	4.39056e-11	2.77563e-10	14.5268
SERF1A	-0.58678	1.21417	-7.13104	4.53135e-11	2.85754e-10	14.4958
EZH2	-0.989742	-2.70932	-7.12516	4.67659e-11	2.94446e-10	14.4648
TRIAP1	-1.1805	-1.70371	-7.12178	4.76195e-11	2.99674e-10	14.4471
PRPSAP1	-0.689891	-1.07378	-7.12051	4.79444e-11	3.01484e-10	14.4404
XLOC_001097	-0.679804	1.83919	-7.11939	4.82338e-11	3.03112e-10	14.4345
MTRNR2L1	0.712409	4.41572	7.11715	4.8817e-11	3.06583e-10	14.4227
RXFP2	0.967402	-3.56105	7.114	4.96461e-11	3.11574e-10	14.4061
P06788	-0.941574	-3.1687	-7.11395	4.96587e-11	3.11574e-10	14.4059
RAB11FIP3	-0.615364	-1.57005	-7.111	5.04516e-11	3.16249e-10	14.3903
KLHL3	-0.674621	-1.83155	-7.11008	5.06987e-11	3.17698e-10	14.3855
XLOC_010897	-0.816434	-2.26523	-7.1063	5.17369e-11	3.23897e-10	14.3656
[truncated: 869 more rows]
