# Supplementary material for: Epithelial-mesenchymal transition-related genes in coronary artery disease
Source: Open Med (Wars). 2022 Apr 22;17(1):781–800. doi: 10.1515/med-2022-0476 (PMC9034345; doi:10.1515/med-2022-0476)
Supplement: Supplementary Table 7 [file med-2022-0476-Table-S7.xlsx]

## Sheet: Supplementary Table 5
FeatureName	FeatureID	AvgRank
p5961	200	1.3
p25083	140	9.8
p2383	196	10.7
p19458	215	11.2
p44600_v4	137	12.2
p21151	90	14.2
p20065	5	15.2
p5821	55	15.9
p8126	82	16.8
p4940	204	19.6
p460	185	21.2
p40724_v4	212	21.6
p24715	26	22.5
p25298	224	22.9
p34065_v4	11	23.6
p4630	225	23.9
p28003	115	24.3
p35910_v4	61	24.7
p9704	153	25.2
p12614	88	28.8
p22710	103	29.1
p23433	217	30.1
p16077	112	31
p21007	79	32.8
p34937_v4	7	34.8
p17985	179	35.4
p33550	219	39.3
p37739_v4	21	42.2
p8896	47	42.4
p34538_v4	132	43.2
p16363	226	43.7
p13124	108	43.8
p35078_v4	4	44
p24067	199	44.7
p33442	73	44.9
p34701_v4	19	45.3
p8756	202	46.1
p19160	198	46.5
p11978	118	46.9
p3657	111	48
p36478_v4	157	48.4
p5948	117	49.8
p15204	125	51.8
p8400	45	54.3
p21970	187	54.8
p28111	1	55.5
p20657	147	56.3
p11014	110	57.4
p18853	190	57.8
p8415	28	58.4
p15307	100	60.1
p22564	33	60.6
p35020_v4	32	62.4
p35085_v4	182	62.7
p8055	134	63.7
p40173_v4	14	64.5
p18481	130	65.9
p2883	232	68.3
p13704	122	69.1
p25362	81	69.8
p16650	209	69.9
p38043_v4	96	70
p7117	42	73.1
p34484_v4	109	73.7
p23217	143	73.8
p23876	67	76.1
p34935_v4	20	77.2
p16022	133	77.9
p37890_v4	34	78.6
p34125_v4	174	79.6
p41971_v4	59	79.7
p41462_v4	57	83.4
p4922	27	84.1
p11291	138	86.4
p34533_v4	223	87.2
p27360	38	87.7
p6576	165	88.3
p3011	121	90.2
p8809	85	90.9
p17029	228	91.1
p28085	164	91.2
p8139	127	91.3
p20538	172	92.7
p651	155	94.7
p36685_v4	183	94.7
p16609	170	94.8
p29557	149	96.1
p35079_v4	9	97
p3121	64	97.2
p2977	70	99.6
p35970_v4	124	100.1
p17346	43	100.7
p28104	156	102.3
p781	71	103.6
p6172	220	103.8
p20488	123	104.2
p38876_v4	44	104.3
p20614	83	104.3
p18885	160	105.4
p13494	191	107.2
p39220_v4	221	109.7
p6190	207	110
p15622	52	110.3
p3500	145	111
p24015	197	113.5
p963	56	113.7
p21229	154	113.7
p33870	12	114.8
p19532	107	116.7
p7994	126	117
p1857	166	120.5
p16197	3	120.9
p13024	98	121.5
p28035	74	121.7
p25027	6	123.2
p9796	230	123.2
p11001	144	123.8
p22848	168	124.5
p33373	142	125.3
p11405	152	126.4
p22698	181	126.5
p3890	86	126.8
p15806	17	128.5
p22277	186	128.7
p26689	16	128.9
p8216	201	129.5
p21650	84	130.2
p9612	177	130.4
p13883	51	133.1
p19897	163	134.5
p26136	119	135.2
p35316_v4	136	136.2
p36331_v4	29	136.4
p35331_v4	210	137.7
p41463_v4	104	138.5
p3461	203	138.6
p6653	161	139.9
p22332	192	142.3
p2892	141	142.6
p3009	216	142.7
p23066	102	143.4
p39065_v4	233	144.4
p36616_v4	91	145.5
p2534	15	147.5
p4681	189	148.1
p43956_v4	75	149.7
p17724	23	150.1
p11509	150	150.3
p18949	105	154.1
p8377	151	155.7
p6342	62	156.3
p9545	93	157.4
p15994	214	157.9
p2726	159	158.7
p4665	77	158.9
p29321	22	159.9
p10786	76	160.4
p8206	25	160.6
p36699_v4	97	160.6
p34858_v4	92	160.8
p21286	229	160.8
p41819_v4	35	161.7
p33389	50	161.7
p23390	60	163.3
p26999	131	163.3
p14058	89	164.2
p35160_v4	128	164.4
p6662	40	164.8
p36234_v4	66	164.8
p26747	31	165
p20595	173	165.1
p18979	69	166
p10500	162	166.1
p7021	231	166.8
p21566	129	167.2
p35990_v4	120	168
p4987	206	168.3
p8575	99	168.6
p11239	48	169.6
p34261_v4	24	169.8
p5731	222	170.4
p15165	158	170.7
p20923	41	170.8
p17683	63	171.5
p35273_v4	180	173.1
p42754_v4	10	173.8
p34528_v4	227	173.8
p4712	87	174
p34632_v4	178	174.1
p10813	211	174.2
p7262	54	174.9
p36751_v4	188	175.4
p34047_v4	176	176.1
p34319_v4	46	176.8
p16967	37	177
p920	2	177.1
p3434	135	177.2
p36533_v4	36	177.4
p8348	13	177.8
p25185	30	178.1
p35573_v4	80	179.8
p28981	78	182.4
p24198	68	182.8
p34479_v4	94	182.9
p20171	218	183.3
p1982	193	184.3
p36647_v4	205	184.3
p4717	213	184.8
p20389	194	185.6
p34087_v4	116	186.2
p13616	171	188.2
p36526_v4	39	189.2
p37109_v4	49	189.2
p11300	175	191.2
p35167_v4	148	191.3
p42317_v4	184	191.5
p16827	167	191.7
p21086	169	192.7
p20031	139	192.9
p25263	8	193
p21651	101	193.8
p36229_v4	72	194.2
p21770	65	196.3
p338	208	197.8
p9119	195	198.7
p29505	58	200.2
p38709_v4	106	200.2
p4754	113	201.1
p7709	146	201.6
p10985	18	202.2
p18151	53	203.3
p7762	114	205.3
p26188	95	210.9
